# Supplementary material for: Identifying priorities for research on financial risk protection to achieve universal health coverage: a scoping overview of reviews
Source: PubMed Central journal article supplement — BMJ Open. 2022 Mar 9;12(3):e052041. doi: 10.1136/bmjopen-2021-052041 (PMC8915291; doi:10.1136/bmjopen-2021-052041), 2022-03-09
Supplement: bmjopen-2021-052041.draft_revisions.pdf [file bmjopen-2021-052041.draft_revisions.pdf]

# BMJ Open

BMJ Open is committed to open peer review. As part of this commitment we make the peer review history of every article we publish publicly available.

When an article is published we post the peer reviewers' comments and the authors' responses online. We also post the versions of the paper that were used during peer review. These are the versions that the peer review comments apply to.

The versions of the paper that follow are the versions that were submitted during the peer review process. They are not the versions of record or the final published versions. They should not be cited or distributed as the published version of this manuscript.

BMJ Open is an open access journal and the full, final, typeset and author-corrected version of record of the manuscript is available on our site with no access controls, subscription charges or pay-per-view fees (<http://bmjopen.bmj.com>).

If you have any questions on BMJ Open's open peer review process please email [info.bmjopen@bmj.com](mailto:info.bmjopen@bmj.com)

# BMJ Open

## Identifying priorities for research on financial risk protection to achieve universal health coverage: A scoping overview of reviews

|                               |                                                                                                                                                                                                                                                                                                                                                                                                                                                                                |
|-------------------------------|--------------------------------------------------------------------------------------------------------------------------------------------------------------------------------------------------------------------------------------------------------------------------------------------------------------------------------------------------------------------------------------------------------------------------------------------------------------------------------|
| Journal:                      | <i>BMJ Open</i>                                                                                                                                                                                                                                                                                                                                                                                                                                                                |
| Manuscript ID                 | bmjopen-2021-052041                                                                                                                                                                                                                                                                                                                                                                                                                                                            |
| Article Type:                 | Original research                                                                                                                                                                                                                                                                                                                                                                                                                                                              |
| Date Submitted by the Author: | 03-Apr-2021                                                                                                                                                                                                                                                                                                                                                                                                                                                                    |
| Complete List of Authors:     | Bhatia, Dominika; University of Toronto, Institute of Health Policy, Management and Evaluation<br>Mishra, Sujata; University of Toronto, Institute of Health Policy, Management and Evaluation; University of Toronto Dalla Lana School of Public Health<br>Kirubarajan, Abirami<br>Yanful, Bernice; University of Toronto Dalla Lana School of Public Health, Allin, Sara; University of Toronto, Institute of Health Policy, Management and Evaluation<br>Di Ruggiero, Erica |
| Keywords:                     | Health policy < HEALTH SERVICES ADMINISTRATION & MANAGEMENT, PUBLIC HEALTH, International health services < HEALTH SERVICES ADMINISTRATION & MANAGEMENT                                                                                                                                                                                                                                                                                                                        |
|                               |                                                                                                                                                                                                                                                                                                                                                                                                                                                                                |

SCHOLARONE™  
Manuscripts

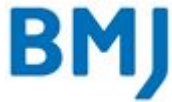

I, the Submitting Author has the right to grant and does grant on behalf of all authors of the Work (as defined in the below author licence), an exclusive licence and/or a non-exclusive licence for contributions from authors who are: i) UK Crown employees; ii) where BMJ has agreed a CC-BY licence shall apply, and/or iii) in accordance with the terms applicable for US Federal Government officers or employees acting as part of their official duties; on a worldwide, perpetual, irrevocable, royalty-free basis to BMJ Publishing Group Ltd ("BMJ") its licensees and where the relevant Journal is co-owned by BMJ to the co-owners of the Journal, to publish the Work in this journal and any other BMJ products and to exploit all rights, as set out in our [licence](#).

The Submitting Author accepts and understands that any supply made under these terms is made by BMJ to the Submitting Author unless you are acting as an employee on behalf of your employer or a postgraduate student of an affiliated institution which is paying any applicable article publishing charge ("APC") for Open Access articles. Where the Submitting Author wishes to make the Work available on an Open Access basis (and intends to pay the relevant APC), the terms of reuse of such Open Access shall be governed by a Creative Commons licence – details of these licences and which [Creative Commons](#) licence will apply to this Work are set out in our licence referred to above.

Other than as permitted in any relevant BMJ Author's Self Archiving Policies, I confirm this Work has not been accepted for publication elsewhere, is not being considered for publication elsewhere and does not duplicate material already published. I confirm all authors consent to publication of this Work and authorise the granting of this licence.

1  
2  
3 **Identifying priorities for research on financial risk protection to achieve universal**  
4 **health coverage: A scoping overview of reviews**  
5  
6  
7

8 **Authors**  
9

10 Dominika Bhatia<sup>1\*‡</sup> [dominika.bhatia@mail.utoronto.ca](mailto:dominika.bhatia@mail.utoronto.ca) ORCID: 0000-0002-9621-0672

11 Sujata Mishra<sup>1,2\*</sup> [sujata.mishra@mail.utoronto.ca](mailto:sujata.mishra@mail.utoronto.ca)

12 Abirami Kirubarajan<sup>1,2</sup> [abi.kirubarajan@gmail.com](mailto:abi.kirubarajan@gmail.com)

13 Bernice Yanful<sup>2</sup> [b.yanful@utoronto.ca](mailto:b.yanful@utoronto.ca)

14 Sara Allin<sup>1§</sup> [sara.allin@utoronto.ca](mailto:sara.allin@utoronto.ca)

15 Erica Di Ruggiero<sup>2§</sup> [e.diruggiero@utoronto.ca](mailto:e.diruggiero@utoronto.ca)  
16  
17  
18  
19  
20  
21  
22

23 **Author affiliations**

24 <sup>1</sup> Institute of Health Policy Management and Evaluation, Dalla Lana School of Public Health,  
25 University of Toronto, Toronto, Ontario, Canada

26 <sup>2</sup> Public Health Sciences Division, Dalla Lana School of Public Health, University of Toronto,  
27 Toronto, Ontario, Canada  
28  
29  
30  
31  
32

33 \*co-lead authors

34 § co-senior authors

35 ‡ corresponding author  
36  
37  
38  
39  
40  
41

42 **Word count:** 4,995

43 **Tables and figures:** 5/5

44 **References:** 79/100  
45  
46  
47  
48  
49  
50  
51  
52  
53  
54  
55  
56  
57  
58  
59  
60

## ABSTRACT

**Objective:** Achievement of universal health coverage (UHC) through financial risk protection (FRP) is embedded in the Sustainable Development Goals. We conducted a scoping overview of reviews to characterize what is known about FRP in the UHC context and to identify priorities for future research.

**Methods:** We used the Arksey & O'Malley and Levac & Colquhoun framework to guide the review process. MEDLINE, PsycINFO, CINAHL-Plus, and PAIS Index were searched systematically for studies published between January 1, 1995 and April 29, 2020. Titles, abstracts, and full-text articles were screened by two independent reviewers in duplicate using the following eligibility criteria: (i) literature review methodology; (ii) focus on FRP in the UHC context; (iii) written in English or French; (iv) published after 1995; and (v) peer-reviewed. Descriptive content analysis was performed to synthesize findings.

**Results:** 35 studies were included. Most studies were systematic reviews focusing on low- and middle-income countries. Study periods spanned 1990 and 2018. While FRP was generally recognized as a dimension of UHC, it was rarely defined as a concept. Out-of-pocket, catastrophic, and impoverishing health expenditures were most commonly used to measure FRP. Pooling arrangements, expansion of insurance coverage, and financial incentives were the most frequent interventions for achieving FRP. Evidence gaps pertained to the effectiveness, cost-effectiveness, and equity implications of efforts aimed at increasing FRP. Methodological gaps related to trade-offs between single-country and multi-country analyses; lack of process evaluations; inadequate mixed-methods evidence, disaggregated by relevant sociodemographic characteristics; lack of comparable data and standardized measurement; and short follow-up periods.

**Conclusion:** This scoping overview of reviews mapped out the state of the evidence on FRP in the UHC context and found evidence gaps related to the effectiveness, cost-effectiveness, and equity implications of FRP interventions. Theory-informed research using high-quality, longitudinal, mixed-methods, and disaggregated data is needed to address these objectives.

**Abstract word count:** 299/300

**Keywords:** evidence gaps, financial risk protection, research priority setting, scoping review, universal health coverage

## STRENGTHS AND LIMITATIONS OF THIS STUDY

- This is the first scoping overview of reviews synthesizing the research priorities on financial risk protection as a concept, intervention, and outcome in the context of universal health coverage.
- This study was guided by a prospectively registered protocol, a rigorous search strategy, and systematic evidence review methods.
- Our searches were limited by language (English and French) and publication year (1995-2020); however, the study periods of the individual included reviews ranged from 1990 to 2018.
- We sought to characterize the published evidence base and, as such, relied on academic peer-reviewed literature.
- As recommended in scoping review guidelines, we relied on the interpretations of the authors of the included reviews, rather than impose our own meanings.

## INTRODUCTION

According to the World Health Organization (WHO), the goal of universal health coverage (UHC) is achieved when “all people and communities can use the promotive, preventive, curative, rehabilitative and palliative health services they need, of sufficient quality to be effective, while also ensuring that the use of these services does not expose the user to financial hardship” (1). The goal of UHC has been articulated in the Sustainable Development Goal (SDG) 3 of the global 2030 Agenda (2). The WHO Thirteenth General Programme of Work (GPW13) also specified a goal of one billion more people benefitting from UHC by the year 2023 (3).

Despite notable progress towards UHC over the past 30 years, an estimated 389 million people will benefit from UHC by 2023, significantly undershooting the GPW13 target (4). Moreover, over 925 million people have been estimated to experience health-related financial hardship and nearly 90 million are pushed into extreme poverty each year (5). Health-related impoverishments also tend to disproportionately affect individuals in low- and middle-income countries (LMIC), as well as populations experiencing social and economic marginalization in high-income countries (HIC) (6).

Financial risk protection (FRP) is one of the three core dimensions of the goal of UHC, along with quality of care and equity. Although FRP has been of interest to economists and researchers for many years, there is substantial debate regarding its conceptualization, measurement, and implementation (7). Since the goal of UHC has also been interpreted as a universal human right to health, equity can be understood as an inherent and cross-cutting dimension (8). As such, evaluating whether FRP is achieved uniformly within the population is a necessary prerequisite to eliminating systemic barriers that produce unjust inequities in healthcare access and health outcomes (9).

Bibliometric analyses suggest that the release of SDGs has stimulated considerable volume of scholarly research activity related to UHC, with nearly half of the studies published after 2015 (10). Research priority setting is an important function of health policy and systems research that ensures alignment between evidence needs and research efforts (11,12). While some recent studies have outlined research priorities related to SDGs implementation (13,14), no studies have focused on priorities related to ensuring equitable FRP to achieve UHC. To assess this need, we performed a scoping overview of reviews (i) to

1  
2  
3 synthesize the existing knowledge on FRP in the context of UHC and (ii) to identify  
4 evidence gaps that should be prioritized in future work.  
5  
6  
7

## 8 **METHODS**

9

10 Conducting a scoping overview of reviews of academic literature using systematic  
11 methods is a common methodology for research priority setting (11,12), as it allows (i) to  
12 provide a high-level summary of the state of the evidence, and (ii) to map out the evidence  
13 gaps and directions for future research, as identified by the research community. We used  
14 the five-step scoping review methodological framework by Arksey & O'Malley and Levac &  
15 Colquhoun (15–17). We adhered to the Preferred Reporting Items for Systematic Reviews  
16 and Meta-Analyses Extension for Scoping Reviews (PRISMA-ScR) reporting guidelines  
17 (18,19) and were guided by a research protocol published prospectively on Open Science  
18 Framework (20).  
19  
20  
21  
22  
23  
24  
25  
26  
27

### 28 **Information sources and search strategy**

29 The search strategy (**Supplementary file 1**) was developed in consultation with an  
30 information specialist with expertise in public health. We searched MEDLINE (Ovid), APA  
31 PsycINFO (Ovid), CINAHL-Plus (EBSCO), and PAIS Index (ProQuest) for English and  
32 French-language sources published between January 1, 1995 and April 29, 2020. This cut-  
33 off was chosen because >97% of the literature on UHC was published after 1995 (10), likely  
34 due to the adoption of the Millennium Development Goals (MDGs) in 2000, in which MDGs  
35 1 and 4-7 expressed a need for universal access to treatment for select health issues (21).  
36 We used validated search filters to identify review articles (22). The search terms included  
37 controlled vocabulary and keywords related to the concepts of (i) UHC, (ii) FRP, and (iii)  
38 equity or impoverishment (23). The bibliographic searches were supplemented by a  
39 review of forward, backward, and co-citations (24).  
40  
41  
42  
43  
44  
45  
46  
47  
48  
49

### 50 **Study selection process**

51 Search strategies were imported into a web-based systematic review management  
52 software, Covidence ([www.covidence.org](http://www.covidence.org)), to remove duplicate citations and perform  
53 citation screening against the predefined selection criteria (**Supplementary file 2**). Studies  
54  
55  
56  
57



1  
2  
3 were eligible if they (i) employed a literature review methodology; (ii) focused on  
4 discussing FRP in the UHC context; (iii) were written in English or French; (iv) were  
5 published after 1995; (v) were an original peer-reviewed published work; and (vi) could be  
6 retrieved through the University of Toronto library. The selection criteria were first piloted  
7 on a sample of 100 citations by two independent researchers (DB, SM). Citations were then  
8 screened in full by the two independent researchers in two phases: (i) titles and abstracts  
9 and (ii) full-text articles. The average Cohen's kappa was calculated to be 0.5, reflecting fair  
10 inter-rater agreement (25). Conflicting votes at both screening phases were resolved  
11 through discussion with other members of the research team.  
12  
13  
14  
15  
16  
17  
18  
19  
20

### 21 **Data extraction and synthesis**

22 The data were extracted verbatim from the included articles. A data charting  
23 template was first piloted in duplicate by two independent reviewers (DB, SM) on a  
24 random selection of 15 articles and discrepancies were discussed with the other co-  
25 authors. Data extraction on the remaining set of articles was divided between the two  
26 reviewers. Data items included publication information; study methodology; study  
27 objectives; descriptive characteristics; definitions of FRP (concepts, measurements, and  
28 interventions); and evidence gaps. Evidence gaps were retrieved from the results,  
29 discussion, and limitation sections of the included articles.  
30  
31  
32  
33  
34  
35  
36

37 To address the first objective, we summarized what is currently known in the  
38 literature about FRP, including its conceptualization, measurement, and implementation.  
39 To address the second objective, we performed a descriptive content analysis of the  
40 extracted data to identify what remains unknown in the literature on FRP and  
41 methodological considerations for future research. Similar to the approach taken by other  
42 studies on research priority-setting in global health (26), this information was framed  
43 more broadly to enable applicability to multiple contexts and research topics. Descriptive  
44 approaches to content analysis involve staying close to the data and are less interpretive  
45 than other meta-aggregative approaches, such as grounded theory or meta-ethnography  
46 (27,28). Descriptive approaches to synthesis are recommended for scoping reviews, as  
47 scoping reviews seek to characterize the state of the literature and clarify concepts (19).  
48  
49  
50  
51  
52  
53  
54  
55  
56  
57  
58  
59  
60

## **Patient and public involvement**

No patients or members of the public were involved in this study.

## **RESULTS**

Following the review of 2,224 records and handsearching, 35 peer-reviewed articles were included (**Figure 1**), with their characteristics presented in **Tables 1** and **2**.

Publication years ranged from 2010 to 2020, with most reviews (n = 24, 69%) published between 2015 and 2020, covering study periods between 1990 and 2018. Most designs were systematic reviews (n = 26, 74%), followed by narrative reviews (n = 3, 9%), and review-based comparative analyses (n = 3, 9%). Among the geographical regions covered by the included reviews, 66% considered countries in the African region; 60% in the South-East Asian and Western-Pacific regions, each; 43% in the Pan-American region; 23% in the European region; and 6% in the Eastern-Mediterranean region. Over half the studies (n = 18, 51%) comprised two or more WHO regions. Over three-quarters (n = 27, 77%) of the reviews focused on LMIC and seven (20%) considered both LMIC and HIC. Ten studies (29%) focused on FRP in specific populations, including women and children, low-income groups, individuals with multimorbidity, and those with mental health issues.

### **What is known in the literature about financial risk protection?**

**Financial risk protection as a concept.** Sixteen studies (46%) explicitly defined FRP and recognized FRP as a necessary step to achieving UHC (29–44). Some studies suggested that FRP is achieved when households are able to use safe, effective, and high-quality health services, without sacrificing other necessities of wellbeing, such as nutrition (29–31,43). Others considered FRP more narrowly as a means of reducing illness-related expenditures (32–34,45–48). Studies further suggested that a lack of FRP may exacerbate health and socioeconomic inequalities by reducing access to health services and discouraging or delaying care-seeking (31,49).

**Financial risk protection as a measure.** Twenty-eight studies (80%) described one or more of the following FRP measures: (i) out-of-pocket expenditures (OOPE) (n = 21, 60%); (ii) catastrophic health expenditures (CHE) (n = 17, 49%); and (iii) impoverishing health expenditures (IHE) (n = 8, 23%), with 13 (37%) studies mentioning at least two

1  
2  
3 measures, and six (17%) considering all three. These measures may be calculated for all  
4 health-related expenditures or specific categories of services, such as chronic disease,  
5 infectious disease, or maternal health (38). As CHE and IHE are measured against  
6 thresholds, some studies may also calculate the mean positive overshoot of the threshold to  
7 quantify the intensity of financial hardship (38,43,50).  
8  
9

10  
11  
12 *Out-of-pocket expenditures.* OOPE include payments, not reimbursed by insurance,  
13 made by individuals or households to meet health-related needs (31,36,44,45,51). Direct  
14 payments include health service costs and indirect payments may include transportation  
15 costs and losses in productivity or income when accessing health services (31,36,45,51).  
16 OOPE indicators may be measured as changes in spending due to illness (44,52); as the  
17 proportion of annual wages or disposable income (37); or as a proportion of the ability to  
18 pay, defined as basic need expenditures (with food often used as a proxy for basic needs)  
19 (31,38,53). OOPE may reflect a low degree of FRP because even small OOPE can cause  
20 financial hardship for poor households (31).  
21  
22  
23  
24  
25  
26  
27

28 *Catastrophic health expenditures.* CHE was defined as excess spending on health that  
29 may cause financial catastrophe, measured as health-related OOPE in the numerator and  
30 total income or consumption (budget share method) or spending on basic needs (ability to  
31 pay method) in the denominator (31,38,43,45,52,53). Thresholds of 10-25% are used for  
32 the budget share method (10% of total household expenditures or 20-25% of total  
33 household income) (31,43,45), and 25-40% for the ability to pay method (31,45,50,53).  
34 Some studies use the normative food spending approach to define ability to pay, where a  
35 household's food-related expenditures are subtracted from total consumption and the  
36 remaining amount is used in the denominator to calculate CHE (31,43,45,53). An advantage  
37 of CHE indicators is that they can be calculated for all income groups; however, these  
38 indicators do not capture descent into poverty owed to healthcare expenditures (43).  
39  
40  
41  
42  
43  
44  
45  
46

47 *Impoverishing health expenditures.* To understand whether health needs push  
48 households into poverty, health-related OOPE may be measured against predefined  
49 poverty lines (31,38,43,44,47,50,52). Poverty lines represent the level at which the basic  
50 needs of life cannot be met (43). Absolute poverty lines may be used, such as the World  
51 Bank international poverty line (currently, \$1.90 per person per day) (31,50) or national  
52 poverty lines based on the World Bank poverty assessment, food poverty (cost of minimum  
53  
54  
55  
56  
57  
58  
59  
60

1  
2  
3 food requirements), or basic needs (cost of the basket of goods considered to satisfy basic  
4 biological needs) (31). Relative thresholds may also be considered, calculated as household  
5 income over the national mean or median income (31).  
6  
7

8 **Financial risk protection as an intervention.** Among the included studies, the  
9 following interventions were employed to increase FRP in the population: (i) pooling  
10 arrangements (n = 8, 23%); (ii) expanding insurance coverage (including either the benefit  
11 package or the proportion of the population or covered) (n = 19, 54%); and (iii)  
12 implementing financial incentives (n = 7, 20%).  
13  
14  
15

16 *Pooling arrangements.* Risk pooling involves de-linking health-related financial  
17 contributions from health risk, enabling lower-need (and by extension, younger and/or  
18 wealthier) individuals to subsidize higher-need (and by extension, older and/or poorer)  
19 individuals (29,34,36,54–56). Consequently, health-related financial risk is spread to a pool  
20 of individuals, rather than being borne by a single person experiencing ill health (54,56).  
21 The design of pooling arrangements, including whether contributions are compulsory or  
22 voluntary, the size of the pool, the number of pools, and government subsidization, affects  
23 the extent to which risk pooling is achieved (29,34,54,56). The pooling arrangements  
24 examined by the included studies comprised social health insurance (SHI; compulsory  
25 schemes operated by the government) (29,42,44,55–57), community-based health  
26 insurance (CBHI; voluntary schemes operated by non-profit and non-governmental  
27 entities) (29,33,40,57,58), and private health insurance (PHI; voluntary schemes operated  
28 by private for-profit entities) (29,42,57).  
29  
30  
31  
32  
33  
34  
35  
36  
37  
38  
39

40 *Expanding coverage.* Several studies examined the effects of expanding the benefit  
41 package (i.e., the health services covered by insurance schemes) and extending coverage to  
42 a greater proportion of the population (41,43–46,48,50,51,58–60). Limited health service  
43 coverage may result in greater OOPE, thereby reducing FRP (44,45,48,50). Populations  
44 experiencing socioeconomic marginalization may also be more vulnerable to increased  
45 OOPEs due to barriers to insurance enrollment, such as premiums (32,59,61). While  
46 previously, many health benefits packages tended to prioritize coverage for low-  
47 probability, high-cost inpatient services, there has been increasing recognition that  
48 outpatient chronic disease prevention and management, including prescription drugs,  
49 drive health-related OOPE (37,43,44).  
50  
51  
52  
53  
54  
55  
56  
57  
58  
59  
60

1  
2  
3 *Financial incentives.* Financial incentives, including cash transfers, vouchers,  
4 removal of user fees, and other subsidies, seek to reduce financial barriers to specific health  
5 services and facilitate utilization, adherence to long-term or chronic treatments, and  
6 health-promotive behaviours in targeted populations experiencing marginalization  
7 (29,30,44,46,49,62,63).  
8  
9  
10  
11  
12

### 13 **Which evidence gaps remain in the literature on financial risk protection?**

14  
15 Studies identified evidence gaps related to the effectiveness of FRP interventions,  
16 their equity implications, and their cost-effectiveness. The identified research evidence  
17 gaps are summarized in **Table 3**.  
18  
19

20  
21 **Evidence of effectiveness.** Studies (n = 16, 46%) recognized that implementation  
22 of FRP programs should be informed by evidence of their effectiveness in relation to health  
23 service use, FRP, health status, and patient experiences.  
24  
25

26 *Impact on health service utilization.* Expansion of the benefit package, SHI and CBHI  
27 insurance models, as well as incentive programs have shown mixed impacts on health  
28 service use (29,43,44,52,56,57). The effects of PHI have been uncertain due to scant impact  
29 evaluations (29,57). In addition to considering the type of FRP intervention, studies may  
30 consider stratifying utilization by health service type. Since many countries are expanding  
31 coverage to outpatient chronic disease and mental health services and prescription drugs,  
32 future studies will need to understand whether this yields increased access and utilization  
33 (29,39,43,44). There is also little evidence regarding the role of FRP interventions in  
34 incentivizing overuse of health services, particularly high-cost invasive procedures  
35 (46,49,56).  
36  
37  
38  
39  
40  
41  
42  
43

44 *Impact on financial risk protection.* The impact of FRP interventions on measures of  
45 FRP, including OOPE, CHE, and IHE, has been unclear (35,43,52,55,56). Studies have  
46 provided the following suggestions for future research to clarify impact: (i) investigating  
47 the specific health services that drive high OOPE (31,43); (ii) the role of chronic illness and  
48 multimorbidity in driving high OOPE (37,38); (iii) the role of non-medical services, such as  
49 transportation and food, in exacerbating health-related OOPE (38,45); and (iv) whether the  
50 cost of premiums or entry fees into insurance schemes (which are presently not included in  
51 health-related OOPE calculations) affect FRP (56).  
52  
53  
54  
55  
56  
57

1  
2  
3 *Impact on experience of care.* Reviews suggested the need to monitor patient  
4 experiences and perceptions of care, as these factors may enable or hinder care-seeking  
5 and there is currently little evidence on how FRP interventions affect this outcome  
6 (41,45,63).  
7  
8  
9

10 *Impact on health status.* Several reviews found little to no evidence regarding the  
11 impact of FRP interventions on population health outcomes, including morbidity, mortality,  
12 disability, or health utility measures (quality-adjusted life years, QALY, or disability-  
13 adjusted life years, DALY), and identified this to be a need for future research  
14 (29,46,52,55,62,63). Among the studies that considered health status, intervention impacts  
15 were characterized as uncertain (29,56,57). Health outcomes may also be tailored to target  
16 populations and health system contexts. For example, the impact of interventions related to  
17 maternal and neonatal may be measured by considering maternal and neonatal health  
18 status (46,62) and outcomes of home-based versus facility-based deliveries, as FRP  
19 interventions may lead to more facility-based deliveries (62).  
20  
21  
22  
23  
24  
25  
26  
27

28 **Equity considerations.** Studies noted that evaluations of effectiveness should also  
29 assess whether FRP intervention impacts are equitable (n = 13, 37%). Specifically, studies  
30 recommended stratifying (i) FRP intervention coverage and (ii) FRP indicators and other  
31 outcomes across subgroups experiencing marginalization. Although poverty is the most  
32 frequent stratification variable, studies have further suggested expanding the definition of  
33 marginalization to other considerations, including advanced geographic area of residence,  
34 age, gender, chronic illness, migration status, employment status, homelessness, and  
35 institutionalization (e.g., residing in penitentiaries or long-term care homes)  
36 (31,32,34,37,39,43).  
37  
38  
39  
40  
41  
42  
43

44 *Stratification of FRP intervention coverage.* Two reviews suggested monitoring new  
45 enrollees in FRP interventions and estimating what proportion of the population covered  
46 was part of a marginalized group, as enrollment may induce selection effects, which may, in  
47 turn, affect downstream outcomes like OOPE or health status (44,56,57,63).  
48  
49  
50

51 *Stratification of FRP intervention impacts.* Some reviews observed that there were  
52 few studies that collected and analyzed OOPE, CHE, or IHE data disaggregated across  
53 relevant subgroups to identify those more likely to experience financial hardship  
54 (31,39,43). These issues contributed to a limited understanding of whether FRP  
55  
56  
57

1  
2  
3 interventions reduced inequities in health-related expenditures among marginalized  
4 groups, compared to the general population (29–31,43,60). Interestingly, among studies  
5 that provided disaggregated data, high expenditures persisted in marginalized groups,  
6 suggesting that either FRP interventions were of limited effectiveness or that the evidence  
7 base is not mature enough to be conclusive (32,38). As it is hypothesized that removing  
8 financial barriers to healthcare would improve population health, studies should similarly  
9 disaggregate other intervention impacts, including health service utilization and long-term  
10 health status (39,56,57,60).

11  
12 **Evidence of cost-effectiveness.** In addition to demonstrating effectiveness, studies  
13 (n = 8, 23%) noted that cost-effectiveness should be considered, given its relevance to  
14 decision-makers. This involves gaining a comprehensive understanding of program  
15 resource requirements, resource management, and comparative cost-effectiveness.

16  
17 *Estimating resource requirements and input costs.* Studies highlighted the need to  
18 estimate start-up (45,49), operating (49,62), and scale-up (55,62) costs of FRP  
19 interventions to ensure adequate coverage of the target population and inform  
20 intervention sustainability. This includes standardizing program costing approaches to  
21 enable robust comparisons (45,62).

22  
23 *Mobilizing and managing resources.* Other key evidence gaps related to articulating  
24 clear approaches to mobilizing resources to meet the needs of FRP programs; determining  
25 optimal program financing models, including the roles of governments and other payers;  
26 and understanding how to best manage resources once programs are funded (34,55,57).

27  
28 *Establishing comparative cost-effectiveness.* Cost-effectiveness includes a broad class  
29 of analyses that seek to estimate the benefit of programs, such as improvements in health  
30 status or changes in health service use, relative to their resource inputs (30,62,63). In  
31 addition to estimating the cost-effectiveness of individual FRP programs, researchers  
32 should consider how cost-effective programs are relative to alternative programs seeking  
33 to achieve the same impacts (49,55,62).

34  
35  
36  
37  
38  
39  
40  
41  
42  
43  
44  
45  
46  
47  
48  
49  
50  
51  
52 **Which methodological gaps remain in the literature on financial risk protection?**  
53  
54  
55  
56  
57

1  
2  
3 A number of methodological issues should be considered when designing studies to  
4 address the identified evidence gaps. A concept map outlining the evidence gaps and  
5 methodological considerations is presented in **Figure 2**.  
6  
7

8 **Country focus.** Researchers should consider the trade-offs of performing single-  
9 country versus multi-country analyses. While multi-country studies provide a snapshot of a  
10 large body of evidence, these analyses tend to lack depth in terms of time-trends and  
11 context-specific factors, prohibiting the ability to infer a link between FRP and national  
12 healthcare schemes, population subgroups with inequitable access to care, and factors  
13 outside of the healthcare system, such as social welfare policies (31,32). In addition,  
14 countries may be unequally represented in multi-country reviews, leading to biased  
15 conclusions (31,33,55,57,61). On the other hand, although findings from single-country  
16 case studies may not be generalizable to other settings (31,41,50,53), they may provide  
17 more detailed contextual information (31,44,57). Multi-jurisdictional case-studies may  
18 provide an opportunity to capitalize on the strengths of both approaches (31).  
19  
20  
21  
22  
23  
24  
25  
26  
27

28 **Process evaluations.** Despite the widespread political commitment to UHC through  
29 FRP, studies noted that implementation of these aims has been suboptimal and there is a  
30 lack of understanding of how contextual factors, including political environment, culture,  
31 population size, historical investment in the healthcare system, economic growth, and the  
32 number of payers (e.g., government, private, and users) may facilitate or hinder  
33 implementation, operation, and scaling up of FRP programs (44,47,55,57). More research is  
34 also needed to elucidate how implementation of new FRP interventions, such as CBHI or  
35 incentive-based programs, could complement the existing health financing arrangements  
36 to progress to UHC (33). In addition to implementation issues, studies highlighted a lack of  
37 evidence regarding the underlying reasons for why FRP interventions do not achieve their  
38 intended impacts after implementation (52). This is especially relevant when considering  
39 the failures of some FRP interventions to reduce inequities in coverage; incurred OOPe,  
40 CHE, and IHE; and poor health outcomes among socially marginalized segments of the  
41 population (36,42,48).  
42  
43  
44  
45  
46  
47  
48  
49  
50  
51

52 Process evaluation could address research questions related to the optimal contexts  
53 and mechanisms for implementing and ensuring the success of FRP interventions (35).  
54 Realist evaluation may be a particularly well-suited methodology, as it seeks to describe  
55  
56  
57



1  
2  
3 what works, for whom and in which circumstances to identify relevant context-  
4 mechanism-outcome configurations (32). Finally, two reviews noted that it is challenging  
5 to infer whether FRP programs are rooted in specific theories of change (30,60). As such,  
6 future studies should consider using conceptual frameworks to inform process evaluations  
7 (30). Consensus should also be reached regarding the relevant process indicators to enable  
8 process evaluation comparability (35).

9  
10  
11  
12  
13  
14 **Qualitative data.** Reviews acknowledged the limited availability of qualitative  
15 evidence (32,35,52). Qualitative data are particularly useful for process evaluations and  
16 realist approaches, as such data can illuminate the reasons for intervention-outcome  
17 associations observed in the quantitative data (particularly counterintuitive ones),  
18 including to understand implementation issues, contextual influences, mechanisms of  
19 change, and inequitable impacts (32,52,55). Hunter and Murray (2017) also cautioned that  
20 studies to date that did include qualitative evidence tended to be situated within large  
21 mixed-methods evaluations, which focused their reporting on the quantitative components  
22 (49). Future qualitative and mixed methods studies should thus provide more thorough  
23 descriptions and rationale regarding the data collection process, analytic methods, and a  
24 reflection on the role of the researcher in generating findings (49).

25  
26  
27  
28  
29  
30  
31  
32  
33 **Quantitative data.** Poorly controlled observational study designs – particularly,  
34 self-reported cross-sectional household surveys – are abundant in the evidence base  
35 (32,40,42,43,45,46,52,56,57,61,62) and most have been rated to be of low to medium  
36 quality (30,37,45,49). This limits the ability to make causal inferences about FRP efforts  
37 and leaves the possibility of residual confounding related to population and health system  
38 factors (33,45,49,62). While the use of randomized-controlled trials may clarify  
39 intervention impacts (46,52), using such study designs to evaluate government reforms or  
40 SHI schemes may not be feasible or ethical, compared to evaluating CBHI or incentive-  
41 based interventions (30,52). Future studies may consider alternative designs, such as well-  
42 controlled quasi-experimental studies, to evaluate programs (56,61). Further, since  
43 countries may employ multiple complex interventions to implement FRP, studies may need  
44 to evaluate combinations of interventions over individual programs (61).

45  
46  
47  
48  
49  
50  
51  
52  
53  
54 **Indicator measurement.** Reviews note that many studies focus on the incidence of  
55 OOPE or CHE, but few consider IHE (31,38). The number of households estimated to be

1  
2  
3 experiencing CHE or IHE is also contingent on the choice of thresholds, which has  
4 implications for equity analyses (31,38,43,44). For instance, IHE measures are affected by  
5 poverty lines, and while international poverty lines may be more suitable for comparative  
6 studies, they may result in less sensitive indicators for HIC and some middle-income  
7 countries (31,38). Using national poverty lines may overcome this issue, but hinder  
8 international comparisons (31). In regard to CHE, studies have shown that the budget  
9 share method tends to find that health-related financial hardship is concentrated among  
10 more wealthy households (31). As such, ability to pay approaches for estimating CHE have  
11 been recommended, particularly when considering equity (31).

12  
13 **Data aggregation.** Meta-analyses could not be performed in many quantitative  
14 reviews (32,45,46,52,53,60). Robust inferences also could not be drawn due to different  
15 data sources (38,45), different data scope (e.g., national vs. targeted population surveys)  
16 (38), different recall periods (45), unclear documentation of data collection processes  
17 (31,43,45), and lack of standardization in data collection across survey cycles and countries  
18 (31,43). In some countries, the wait period to receive insurance coverage for new enrollees  
19 or migrants may also contribute to the risk of misclassification bias, as these groups would  
20 be considered uninsured and may incur higher healthcare costs (45). Finally, it is unclear  
21 how the data collected for purposes other than FRP assessment, such as administrative  
22 data, may affect estimates of incurred costs (38).

23  
24 **Follow-up duration.** Most quantitative studies were conducted early in the FRP  
25 program implementation periods, particularly those evaluating program pilots  
26 (31,38,42,47,49,62). This may explain few evaluations of population health outcomes and  
27 equity, as well as an unclear understanding of long-term trends in FRP indicators, such as  
28 OPE, CHE, or IHE (38,47,62). Future studies should consider using longitudinal and panel  
29 data to analyze FRP intervention impacts over time (31,38,42,43,47).

## 30 31 32 33 34 35 36 37 38 39 40 41 42 43 44 45 46 47 48 49 **DISCUSSION**

50 In this scoping overview of 35 academic literature reviews, we described the  
51 current state of the evidence on FRP in the UHC context and identified evidence gaps that  
52 should be prioritized in future research. We found that although FRP is recognized as a  
53 necessary component for achieving UHC, it remains unclear whether FRP interventions are  
54  
55  
56  
57

1  
2  
3 effective at reducing health-related financial burden and optimizing health service  
4 utilization, experience of care, and health outcomes. The lack of disaggregated information  
5 across sociodemographic groups may further explain the limited understanding regarding  
6 how to equitably improve FRP among segments of the population most vulnerable to  
7 experiencing poor health and its financial consequences. Finally, there is little evidence  
8 regarding the resources required to implement and sustain FRP interventions and  
9 regarding their cost-effectiveness. These evidence gaps are further compounded by  
10 methodological challenges.

### 11 **Interpretation and future directions**

12  
13 Previous work has suggested that the theory of change for SDG 3 has notable  
14 limitations, including an omission of impact indicators for FRP (where impacts are defined  
15 as changes occurring in communities or systems as a result of FRP) (64). This may explain  
16 few effectiveness studies of FRP interventions and underscores the need to evaluate their  
17 impacts on service utilization, financial risk, experience of care, and health status. Reliance  
18 on cross-sectional self-reported surveys in LMIC settings may also underlie data quality  
19 issues, including the lack of longitudinal follow-up and poor inter-jurisdictional  
20 comparability, that way contributing to the inconclusiveness of effectiveness and cost-  
21 effectiveness evaluations (65–67). The growing use of routine health information data  
22 systems for research purposes in LMIC may present an opportunity to conduct higher-  
23 quality effectiveness and cost-effectiveness studies, as these data sources may be better-  
24 equipped to support longitudinal program evaluations (43,67,68). In addition, since impact  
25 evaluations are limited in their ability to understand intervention mechanisms of action  
26 (69), we note that process evaluations should accompany impact evaluations in future  
27 work. The use of qualitative methods may further explain differential intervention impacts  
28 across population subgroups and inform equity implications (69).

29  
30 Inconsistencies in concept definitions may underlie methodological issues. While  
31 there is general agreement on the importance of UHC, interpretations of the concepts of  
32 universality, health, and coverage vary in breadth, affecting the scope of FRP interventions  
33 and the choice of indicators used to monitor progress (8,70,71). The common indicators of  
34 FRP – OOPe, CHE, and IHE – may also not sufficiently capture the concept, as these  
35 measures rely on healthcare utilization and do not account for individuals deterred from  
36  
37  
38  
39  
40  
41  
42  
43  
44  
45  
46  
47  
48  
49  
50  
51  
52  
53  
54  
55  
56  
57  
58  
59  
60

1  
2  
3 care-seeking by financial barriers (7,72). In addition, expenditure-based metrics do not  
4 take into consideration whether those at risk of financial hardship opt for lower-quality  
5 health services (7,44). Equity has often been considered to be implicit in the goal of UHC  
6 and an assumed consequence of its achievement (9,73). However, there is an increasing  
7 recognition that striving for health for all and reducing disparities are two separate aims,  
8 warranting the need to measure and monitor equity in research on UHC (9,73). Similar to  
9 our findings, scholars have also suggested broadening the definition of equity from wealth  
10 to geographic and cultural disparities (73).

11  
12  
13  
14  
15  
16  
17 The focus on LMIC in the literature may not be surprising, as the concurrent burden  
18 of poverty and infectious and chronic diseases makes the achievement of UHC even more  
19 salient in these settings (74). Nonetheless, the underrepresentation of HIC in the literature  
20 is notable. In Canada, 7% of households faced CHE between 2010 and 2015, with rural and  
21 low-income households spending a greater share of their ability to pay on healthcare (75).  
22 In the United States, 29 million people remained uninsured in 2015, with a greater  
23 proportion of poor and near-poor households affected (76). Up to 17% of European  
24 households experienced CHE between 2011 and 2016, with up to 40% of households in the  
25 poorest quintile affected (72). High OOPe in both Europe and North America have largely  
26 been driven by expenditures on pharmaceuticals, medical devices, outpatient services, and  
27 dental care, likely due to gaps in insurance coverage (72,77,78). Our identified research  
28 objectives may therefore be appropriate for investigation in HIC settings to improve FRP  
29 among socially marginalized groups.

### 30 31 32 33 34 35 36 37 38 39 40 **Strengths and limitations**

41  
42 We conducted the first scoping study to identify priorities for research on FRP. A  
43 strength of our study is our use of rigorous systematic searching and evidence review  
44 methods. Some limitations should also be considered. First, we limited our search by  
45 language and publication dates. Although prior work has shown that the conclusions of  
46 systematic reviews of the medical literature are not modified by language restrictions (79),  
47 this has not been evaluated in regard to global health. We thus recognize that we may have  
48 missed relevant studies written in languages other than English or French. We believe our  
49 inclusion of evidence published after 1995 to be reasonable, as bibliometric analyses have  
50 shown that research interest in UHC began to grow around the adoption of MDGs in 2000  
51  
52  
53  
54  
55  
56  
57

1  
2  
3 (10). Furthermore, the study periods of the primary studies within the included reviews  
4 covered 1990 and 2018. Second, as our objective was to review the academic evidence base  
5 and characterize knowledge gaps, we relied on published peer-reviewed work, rather than  
6 grey literature. Third, we employed descriptive content analysis methods, which involve  
7 greater reliance on the original study authors' interpretations. As noted earlier, such  
8 approaches are appropriate for scoping reviews, which have descriptive aims and do not  
9 seek to generate in-depth theories (19).  
10  
11  
12  
13  
14

### 15 **Conclusion**

16  
17 This scoping overview of reviews mapped out the state of the evidence on FRP in  
18 the UHC context and found evidence gaps related to the effectiveness, cost-effectiveness,  
19 and equity implications of FRP interventions. Theory-informed research using high-quality,  
20 longitudinal, mixed-methods data, disaggregated by socioeconomic marginalization status,  
21 is needed to address these objectives.  
22  
23  
24  
25  
26  
27  
28  
29

30 **CONTRIBUTION:** All listed authors were involved in conceptualizing and designing the  
31 study. DB and SM performed citation screening, data extraction, data synthesis, and drafted  
32 the first version of the manuscript. All authors contributed critically to subsequent  
33 revisions and approved the final manuscript.  
34  
35  
36  
37

38 **ACKNOWLEDGEMENTS:** We gratefully acknowledge Vincci Lui (Gerstein Science  
39 Information Centre, University of Toronto) for providing expert advice on the bibliographic  
40 database search strategy. We also thank our grant collaborators, Drs. Beverley Essue, Garry  
41 Aslanyan, Miguel Gonzalez Block, Gregory Marchildon, and Jeremy Veillard, for their helpful  
42 comments on earlier versions of this work. This research was supported by a grant from  
43 the Canadian Institutes for Health Research (CIHR) (#407149) for the project titled  
44 "*Towards Equitable Universal Health Coverage in a Globalized Era: A Research Agenda-  
45 Setting Workshop*".  
46  
47  
48  
49  
50  
51  
52  
53

54 **COMPETING INTERESTS:** The authors have no competing interest to declare.  
55  
56  
57  
58  
59  
60

**ETHICS APPROVAL:** Not required.

**DATA SHARING:** This work analyzed secondary sources, which are cited and are accessible publicly or with academic institutional credentials. Search strategies are provided in the supplementary material and data extraction templates can be made available upon reasonable request to the corresponding author.

## REFERENCES

1. World Health Organization. What is health financing for universal coverage? 2019b.
2. United Nations Department of Economic and Social Affairs. The Sustainable Development Goals Report 2016 (The Sustainable Development Goals Report) [Internet]. United Nations; 2016. Available from: <https://doi.org/10.18356/3405d09f-en>
3. World Health Organization. Thirteenth General Programme of Work 2019–2023 [Internet]. World Health Organization; 2019. Available from: <https://www.who.int/about/what-we-do/thirteenth-general-programme-of-work-2019---2023>
4. Lozano R, Fullman N, Mumford JE, Knight M, Barthelemy CM, Abbafati C, et al. Measuring universal health coverage based on an index of effective coverage of health services in 204 countries and territories, 1990–2019: a systematic analysis for the Global Burden of Disease Study 2019. *The Lancet*. 2020 Oct;396(10258):1250–84.
5. World Health Organization. Primary health care on the road to universal health coverage: 2019 monitoring report: executive summary [Internet]. World Health Organization; 2019. Available from: <https://www.who.int/docs/default-source/documents/2019-uhc-report-executive-summary>
6. World Health Organization. Chapter 2: NCDs and development. [Internet]. Available from: [https://www.who.int/nmh/publications/ncd\\_report\\_chapter2.pdf?ua=1](https://www.who.int/nmh/publications/ncd_report_chapter2.pdf?ua=1)
7. Saksena P, Hsu J, Evans DB. Financial Risk Protection and Universal Health Coverage: Evidence and Measurement Challenges. *PLoS Med*. 2014 Sep 22;11(9):e1001701.
8. Abihiro GA, De Allegri M. Universal health coverage from multiple perspectives: a synthesis of conceptual literature and global debates. *BMC Int Health Hum Rights*. 2015 Dec;15(1):17.

- 1  
2  
3 9. Rodney AM, Hill PS. Achieving equity within universal health coverage: a narrative  
4 review of progress and resources for measuring success. *International Journal for*  
5 *Equity in Health* [Internet]. 2014 Dec [cited 2020 Apr 24];13(1). Available from:  
6 <http://equityhealthj.biomedcentral.com/articles/10.1186/s12939-014-0072-8>  
7  
8
- 9 10. Ghanbari MK, Behzadifar M, Doshmangir L, Martini M, Bakhtiari A, Alikhani M, et al.  
10 Mapping Research Trends of Universal Health Coverage From 1990 to 2019:  
11 Bibliometric Analysis. *JMIR Public Health Surveill*. 2021 Jan 11;7(1):e24569.  
12
- 13 11. Ranson MK, Bennett SC. Priority setting and health policy and systems research.  
14 *Health Research Policy and Systems* [Internet]. 2009 Dec [cited 2020 Apr 26];7(1).  
15 Available from: [https://health-policy-](https://health-policy-systems.biomedcentral.com/articles/10.1186/1478-4505-7-27)  
16 [systems.biomedcentral.com/articles/10.1186/1478-4505-7-27](https://health-policy-systems.biomedcentral.com/articles/10.1186/1478-4505-7-27)  
17  
18
- 19 12. Nyanchoka L, Tudur-Smith C, Thu VN, Iversen V, Tricco AC, Porcher R. A scoping  
20 review describes methods used to identify, prioritize and display gaps in health  
21 research. *Journal of Clinical Epidemiology*. 2019 May;109:99–110.  
22
- 23 13. Bennett S, Jessani N, Glandon D, Qiu M, Scott K, Meghani A, et al. Understanding the  
24 implications of the Sustainable Development Goals for health policy and systems  
25 research: results of a research priority setting exercise. *Globalization and Health*  
26 [Internet]. 2020 Dec [cited 2020 Apr 23];16(1). Available from:  
27 [https://globalizationandhealth.biomedcentral.com/articles/10.1186/s12992-019-](https://globalizationandhealth.biomedcentral.com/articles/10.1186/s12992-019-0534-2)  
28 [0534-2](https://globalizationandhealth.biomedcentral.com/articles/10.1186/s12992-019-0534-2)  
29  
30
- 31 14. Qiu M, Jessani N, Bennett S. Identifying health policy and systems research priorities  
32 for the sustainable development goals: social protection for health. *International*  
33 *Journal for Equity in Health* [Internet]. 2018 Dec [cited 2020 Nov 2];17(1). Available  
34 from: <https://equityhealthj.biomedcentral.com/articles/10.1186/s12939-018-0868-z>  
35  
36
- 37 15. Arksey H, O'Malley L. Scoping studies: towards a methodological framework.  
38 *International journal of social research methodology*. 2005;8(1):19–32.  
39
- 40 16. Levac D, Colquhoun H, O'Brien KK. Scoping studies: advancing the methodology.  
41 *Implementation science : IS*. 2010 Sep 20;5:69.  
42  
43
- 44 17. Colquhoun HL, Levac D, O'Brien KK, Straus S, Tricco AC, Perrier L, et al. Scoping  
45 reviews: time for clarity in definition, methods, and reporting. *Journal of clinical*  
46 *epidemiology*. 2014 Dec;67(12):1291–4.  
47
- 48 18. Tricco AC, Lillie E, Zarin W, O'Brien KK, Colquhoun H, Levac D. PRISMA Extension for  
49 Scoping Reviews (PRISMA-ScR): Checklist and Explanation. *Ann Intern Medicine*.  
50 2018;169:467–73.  
51  
52
- 53 19. Peters MDJ, Marnie C, Tricco AC, Pollock D, Munn Z, Alexander L, et al. Updated  
54 methodological guidance for the conduct of scoping reviews. *JBIM Evidence Synthesis*.  
55 2020 Oct;18(10):2119–26.  
56  
57

- 1  
2  
3 20. Mishra S, Bhatia D, Allin S, Yanful B, Kirubarajan A, Di Ruggiero E. Financial Risk  
4 Protection under Universal Health Coverage: A Scoping Review Protocol [Internet].  
5 Open Science Framework; 2020. Available from:  
6 [https://osf.io/kqamx/?view\\_only=6315dbae7133475d8a294ff9db45df01](https://osf.io/kqamx/?view_only=6315dbae7133475d8a294ff9db45df01)  
7  
8
- 9 21. World Health Organization. Millennium Development Goals (MDGs) [Internet]. World  
10 Health Organization; 2018. Available from: [https://www.who.int/news-room/fact-](https://www.who.int/news-room/fact-sheets/detail/millennium-development-goals-(mdgs))  
11 [sheets/detail/millennium-development-goals-\(mdgs\)](https://www.who.int/news-room/fact-sheets/detail/millennium-development-goals-(mdgs))  
12
- 13 22. InterTASC Information Specialists SubGroup. Systematic Reviews: Filters [Internet].  
14 InterTASC Information Specialists SubGroup; 2020. Available from:  
15 [https://sites.google.com/a/york.ac.uk/issg-search-filters-resource/home/systematic-](https://sites.google.com/a/york.ac.uk/issg-search-filters-resource/home/systematic-reviews?authuser=0)  
16 [reviews?authuser=0](https://sites.google.com/a/york.ac.uk/issg-search-filters-resource/home/systematic-reviews?authuser=0)  
17  
18
- 19 23. Hosking J, Macmillan A, Jones R, Ameratunga S, Woodward A. Searching for health  
20 equity: validation of a search filter for ethnic and socioeconomic inequalities in  
21 transport. *Systematic Reviews* [Internet]. 2019 Dec [cited 2020 Apr 26];8(1).  
22 Available from:  
23 [https://systematicreviewsjournal.biomedcentral.com/articles/10.1186/s13643-019-](https://systematicreviewsjournal.biomedcentral.com/articles/10.1186/s13643-019-1009-5)  
24 [1009-5](https://systematicreviewsjournal.biomedcentral.com/articles/10.1186/s13643-019-1009-5)  
25  
26
- 27 24. Connected Papers [Internet]. 2021. Available from:  
28 <https://www.connectedpapers.com/about>  
29
- 30 25. Higgins JPT, Green S (editors). *Cochrane Handbook for Systematic Reviews of*  
31 *Interventions*. [Internet]. Version 5.1.0 [updated March 2011]. The Cochrane  
32 Collaboration; 2011. Available from: <http://handbook.cochrane.org>  
33  
34
- 35 26. Glandon D, Meghani A, Jessani N, Qiu M, Bennett S. Identifying health policy and  
36 systems research priorities on multisectoral collaboration for health in low-income  
37 and middle-income countries. *BMJ Global Health*. 2018 Oct;3(Suppl 4):e000970.  
38
- 39 27. Sandelowski M. Whatever happened to qualitative description? *Research in Nursing &*  
40 *Health*. 2000;23:334–40.  
41
- 42 28. Sandelowski M. What's in a name? Qualitative description revisited: QUALITATIVE  
43 DESCRIPTION REVISITED. *Res Nurs Health*. 2010 Feb;33(1):77–84.  
44  
45
- 46 29. Wiysonge C.S., Paulsen E., Lewin S., Ciapponi A., Herrera C.A., Opiyo N., et al. Financial  
47 arrangements for health systems in low-income countries: An overview of systematic  
48 reviews. *Cochrane Database Syst Rev*. 2017;2017(9):CD011084.  
49  
50
- 51 30. Bright T, Felix L, Kuper H, Polack S. A systematic review of strategies to increase  
52 access to health services among children in low and middle income countries. *BMC*  
53 *Health Services Research* [Internet]. 2017 Dec [cited 2020 Nov 17];17(1). Available  
54 from: [http://bmchealthservres.biomedcentral.com/articles/10.1186/s12913-017-](http://bmchealthservres.biomedcentral.com/articles/10.1186/s12913-017-2180-9)  
55 [2180-9](http://bmchealthservres.biomedcentral.com/articles/10.1186/s12913-017-2180-9)  
56  
57



- 1  
2  
3 31. Yerramilli P, Fernández Ó, Thomson S. Financial protection in Europe: a systematic  
4 review of the literature and mapping of data availability. *Health Policy*. 2018  
5 May;122(5):493–508.  
6
- 7  
8 32. van Hees SGM, O’Fallon T, Hofker M, Dekker M, Polack S, Banks LM, et al. Leaving no  
9 one behind? Social inclusion of health insurance in low- and middle-income countries:  
10 a systematic review. *International Journal for Equity in Health* [Internet]. 2019 Dec  
11 [cited 2020 Dec 7];18(1). Available from:  
12 <https://equityhealthj.biomedcentral.com/articles/10.1186/s12939-019-1040-0>  
13
- 14  
15 33. Fadlallah R, El-Jardali F, Hemadi N, Morsi RZ, Abou Samra CA, Ahmad A, et al. Barriers  
16 and facilitators to implementation, uptake and sustainability of community-based  
17 health insurance schemes in low- and middle-income countries: a systematic review.  
18 *International Journal for Equity in Health* [Internet]. 2018 Dec [cited 2020 Dec  
19 7];17(1). Available from:  
20 <https://equityhealthj.biomedcentral.com/articles/10.1186/s12939-018-0721-4>  
21
- 22  
23 34. Uzochukwu B, Ughasoro M, Okwuosa C, Onwujekwe O, Envuladu E, Etiaba E. Health  
24 care financing in Nigeria: Implications for achieving universal health coverage.  
25 *Nigerian Journal of Clinical Practice*. 2015;18(4):437.  
26
- 27  
28 35. Prinja S, Chauhan AS, Karan A, Kaur G, Kumar R. Impact of Publicly Financed Health  
29 Insurance Schemes on Healthcare Utilization and Financial Risk Protection in India: A  
30 Systematic Review. Xia C-Y, editor. *PLOS ONE*. 2017 Feb 2;12(2):e0170996.  
31
- 32  
33 36. Myint C-Y, Pavlova M, Thein K-N-N, Groot W. A systematic review of the health-  
34 financing mechanisms in the Association of Southeast Asian Nations countries and the  
35 People’s Republic of China: Lessons for the move towards universal health coverage.  
36 Hotchkiss D, editor. *PLOS ONE*. 2019 Jun 14;14(6):e0217278.  
37
- 38  
39 37. Sum G, Hone T, Atun R, Millett C, Suhrcke M, Mahal A, et al. Multimorbidity and out-of-  
40 pocket expenditure on medicines: a systematic review. *BMJ Global Health*. 2018  
41 Feb;3(1):e000505.  
42
- 43  
44 38. Njagi P, Arsenijevic J, Groot W. Understanding variations in catastrophic health  
45 expenditure, its underlying determinants and impoverishment in Sub-Saharan African  
46 countries: a scoping review. *Systematic Reviews* [Internet]. 2018 Dec [cited 2020 Dec  
47 6];7(1). Available from:  
48 <https://systematicreviewsjournal.biomedcentral.com/articles/10.1186/s13643-018-0799-1>  
49
- 50  
51 39. Docrat S, Besada D, Cleary S, Lund C. The impact of social, national and community-  
52 based health insurance on health care utilization for mental, neurological and  
53 substance-use disorders in low- and middle-income countries: a systematic review.  
54 *Health Economics Review* [Internet]. 2020 Dec [cited 2020 Dec 6];10(1). Available  
55 from: <https://healtheconomicsreview.biomedcentral.com/articles/10.1186/s13561-020-00268-x>  
56  
57

- 1  
2  
3 40. Adebayo EF, Uthman OA, Wiysonge CS, Stern EA, Lamont KT, Ataguba JE. A systematic  
4 review of factors that affect uptake of community-based health insurance in low-  
5 income and middle-income countries. *BMC Health Services Research* [Internet]. 2015  
6 Jun [cited 2020 Nov 17];15(1). Available from:  
7 <http://bmchealthservres.biomedcentral.com/articles/10.1186/s12913-015-1179-3>  
8  
9
- 10 41. Sanogo NA, Fantaye AW, Yaya S. Universal Health Coverage and Facilitation of  
11 Equitable Access to Care in Africa. *Frontiers in Public Health* [Internet]. 2019 Apr 26  
12 [cited 2020 Nov 17];7. Available from:  
13 <https://www.frontiersin.org/article/10.3389/fpubh.2019.00102/full>  
14  
15
- 16 42. Izzanie M, Khaled N, Aidalina M. HEALTH INSURANCE INEQUITY IN SELECTED ASIA  
17 COUNTRIES. *International Journal of Public Health and Clinical Sciences* [Internet].  
18 2019 Nov 1 [cited 2020 Dec 7];6(5). Available from:  
19 <http://publichealthmy.org/ejournal/ojs2/index.php/ijphcs/article/view/1046/671>  
20  
21
- 22 43. Koch KJ, Cid Pedraza C, Schmid A. Out-of-pocket expenditure and financial protection  
23 in the Chilean health care system—A systematic review. *Health Policy*. 2017  
24 May;121(5):481–94.  
25
- 26 44. Lagomarsino G, Garabrant A, Adyas A, Muga R, Otoo N. Moving towards universal  
27 health coverage: health insurance reforms in nine developing countries in Africa and  
28 Asia. *The Lancet*. 2012 Sep;380(9845):933–43.  
29
- 30 45. Okoroh J, Essoun S, Seddoh A, Harris H, Weissman JS, Dsane-Selby L, et al. Evaluating  
31 the impact of the national health insurance scheme of Ghana on out of pocket  
32 expenditures: a systematic review. *BMC Health Services Research* [Internet]. 2018 Dec  
33 [cited 2020 Dec 6];18(1). Available from:  
34 <https://bmchealthservres.biomedcentral.com/articles/10.1186/s12913-018-3249-9>  
35  
36
- 37 46. Comfort AB, Peterson LA, Hatt LE. Effect of Health Insurance on the Use and Provision  
38 of Maternal Health Services and Maternal and Neonatal Health Outcomes: A  
39 Systematic Review. 2013;31(4):25.  
40  
41
- 42 47. Van Minh H, Pocock NS, Chaiyakunapruk N, Chhorvann C, Duc HA, Hanvoravongchai P,  
43 et al. Progress toward universal health coverage in ASEAN. *Global Health Action*. 2014  
44 Dec;7(1):25856.  
45
- 46 48. Ökem ZG, Çakar M. What have health care reforms achieved in Turkey? An appraisal of  
47 the “Health Transformation Programme.” *Health Policy*. 2015 Sep;119(9):1153–63.  
48  
49
- 50 49. Hunter BM, Murray SF. Demand-side financing for maternal and newborn health: what  
51 do we know about factors that affect implementation of cash transfers and voucher  
52 programmes? *BMC Pregnancy and Childbirth* [Internet]. 2017 Dec [cited 2020 Nov  
53 17];17(1). Available from:  
54 [http://bmcpregnancychildbirth.biomedcentral.com/articles/10.1186/s12884-017-](http://bmcpregnancychildbirth.biomedcentral.com/articles/10.1186/s12884-017-1445-y)  
55 [1445-y](http://bmcpregnancychildbirth.biomedcentral.com/articles/10.1186/s12884-017-1445-y)  
56  
57

- 1  
2  
3  
4  
5  
6  
7  
8  
9  
10  
11  
12  
13  
14  
15  
16  
17  
18  
19  
20  
21  
22  
23  
24  
25  
26  
27  
28  
29  
30  
31  
32  
33  
34  
35  
36  
37  
38  
39  
40  
41  
42  
43  
44  
45  
46  
47  
48  
49  
50  
51  
52  
53  
54  
55  
56  
57  
58  
59  
60
50. Okedo-Alex IN, Akamike IC, Ezeanosike OB, Uneke CJ. A review of the incidence and determinants of catastrophic health expenditure in Nigeria: Implications for universal health coverage. *The International Journal of Health Planning and Management* [Internet]. 2019 Oct [cited 2020 Dec 8];34(4). Available from: <https://onlinelibrary.wiley.com/doi/abs/10.1002/hpm.2847>
  51. Odeyemi IA, Nixon J. Assessing equity in health care through the national health insurance schemes of Nigeria and Ghana: a review-based comparative analysis. *Int J Equity Health*. 2013;12(1):9.
  52. Erlangga D, Suhrcke M, Ali S, Bloor K. The impact of public health insurance on health care utilisation, financial protection and health status in low- and middle-income countries: A systematic review. Buttigieg SC, editor. *PLOS ONE*. 2019 Aug 28;14(8):e0219731.
  53. Rezaei S, Woldemichael A, Hajizadeh M, Kazemi Karyani A. Catastrophic healthcare expenditures among Iranian households: a systematic review and meta-analysis. *International Journal of Human Rights in Healthcare*. 2019 May 7;12(2):105–15.
  54. Mathauer I, Saksena P, Kutzin J. Pooling arrangements in health financing systems: a proposed classification. *International Journal for Equity in Health* [Internet]. 2019 Dec [cited 2020 Nov 17];18(1). Available from: <https://equityhealthj.biomedcentral.com/articles/10.1186/s12939-019-1088-x>
  55. Angell B, Dodd R, Palagyi A, Gadsden T, Abimbola S, Prinja S, et al. Primary health care financing interventions: a systematic review and stakeholder-driven research agenda for the Asia-Pacific region. *BMJ Global Health*. 2019 Aug;4(Suppl 8):e001481.
  56. Acharya A, Vellakkal S, Taylor F, Masset E, Satija A, Burke M, et al. The Impact of Health Insurance Schemes for the Informal Sector in Low- and Middle-Income Countries: A Systematic Review. *The World Bank Research Observer*. 2013 Aug 1;28(2):236–66.
  57. Spaan E, Mathijssen J, Tromp N, McBain F, ten Have A, Baltussen R. The impact of health insurance in Africa and Asia: a systematic review. *Bull World Health Org*. 2012 Sep 1;90(9):685–92.
  58. Odeyemi IA. Community-based health insurance programmes and the national health insurance scheme of Nigeria: challenges to uptake and integration. *International Journal for Equity in Health*. 2014;13(1):20.
  59. Bucagu M, Kagubare JM, Basinga P, Ngabo F, Timmons BK, Lee AC. Impact of health systems strengthening on coverage of maternal health services in Rwanda, 2000–2010: a systematic review. *Reproductive Health Matters*. 2012 Jan;20(39):50–61.
  60. Salmi L-R, Barsanti S, Bourgueil Y, Daponte A, Piznal E, Ménival S, et al. Interventions addressing health inequalities in European regions: the AIR project. *Health Promotion International*. 2017 Jun 1;32(3):430–41.

- 1  
2  
3 61. Meng Q, Yuan B, Jia L, Wang J, Yu B, Gao J, et al. Expanding health insurance coverage  
4 in vulnerable groups: a systematic review of options. *Health Policy and Planning*. 2011  
5 Mar 1;26(2):93–104.  
6
- 7  
8 62. Bellows BW, Conlon CM, Higgs ES, Townsend JW, Nahed MG, Cavanaugh K, et al. A  
9 Taxonomy and Results from a Comprehensive Review of 28 Maternal Health Voucher  
10 Programmes. 2013;31(4):23.  
11
- 12 63. Grainger C, Gorter A, Okal J, Bellows B. Lessons from sexual and reproductive health  
13 voucher program design and function: a comprehensive review. *International Journal  
14 for Equity in Health*. 2014;13(1):33.  
15
- 16 64. Seidman G. Does SDG 3 have an adequate theory of change for improving health  
17 systems performance? *Journal of Global Health*. 2017 Jun;7(1):010302.  
18
- 19 65. Aftab W, Siddiqui FJ, Tasic H, Perveen S, Siddiqui S, Bhutta ZA. Implementation of health  
20 and health-related sustainable development goals: progress, challenges and  
21 opportunities – a systematic literature review. *BMJ Glob Health*. 2020  
22 Aug;5(8):e002273.  
23
- 24 66. Luz A, Santatiwongchai B, Pattanaphesaj J, Teerawattananon Y. Identifying priority  
25 technical and context-specific issues in improving the conduct, reporting and use of  
26 health economic evaluation in low- and middle-income countries. *Health Res Policy  
27 Sys*. 2018 Dec;16(1):4.  
28
- 29 67. Griffiths UK, Legood R, Pitt C. Comparison of Economic Evaluation Methods Across  
30 Low-income, Middle-income and High-income Countries: What are the Differences  
31 and Why?: *Economic Evaluation Methods: Differences Across Country Income Groups*.  
32 *Health Econ*. 2016 Feb;25:29–41.  
33
- 34 68. Hung YW, Hoxha K, Irwin BR, Law MR, Grépin KA. Using routine health information  
35 data for research in low- and middle-income countries: a systematic review. *BMC  
36 Health Serv Res*. 2020 Dec;20(1):790.  
37
- 38 69. McGill E, Marks D, Er V, Penney T, Petticrew M, Egan M. Qualitative process evaluation  
39 from a complex systems perspective: A systematic review and framework for public  
40 health evaluators. Kruk ME, editor. *PLoS Med*. 2020 Nov 2;17(11):e1003368.  
41
- 42 70. O'Connell T, Rasanathan K, Chopra M. What does universal health coverage mean? *The  
43 Lancet*. 2014 Jan;383(9913):277–9.  
44
- 45 71. Hogan DR, Stevens GA, Hosseinpoor AR, Boerma T. Monitoring universal health  
46 coverage within the Sustainable Development Goals: development and baseline data  
47 for an index of essential health services. *The Lancet Global Health*. 2018  
48 Feb;6(2):e152–68.  
49  
50  
51  
52  
53  
54  
55  
56  
57

- 1  
2  
3 72. Thomson S, Cylus J, Evetovits T, Srakar A. Can people afford to pay for health care?  
4 new evidence on financial protection in Europe: [regional report [Internet].  
5 Copenhagen: World Health Organization, Regional Office for Europe; 2019 [cited 2020  
6 Apr 23]. Available from:  
7 [https://apps.who.int/iris/bitstream/handle/10665/311654/9789289054058-](https://apps.who.int/iris/bitstream/handle/10665/311654/9789289054058-eng.pdf?sequence=1&isAllowed=y)  
8 [eng.pdf?sequence=1&isAllowed=y](https://apps.who.int/iris/bitstream/handle/10665/311654/9789289054058-eng.pdf?sequence=1&isAllowed=y)  
9  
10  
11 73. Amri MM, Jessiman-Perreault G, Siddiqi A, O'Campo P, Enright T, Di Ruggiero E.  
12 Scoping review of the World Health Organization's underlying equity discourses:  
13 apparent ambiguities, inadequacy, and contradictions. *Int J Equity Health*. 2021  
14 Dec;20(1):70.  
15  
16  
17 74. Sands P. 4.2: Financing universal health coverage. In: *Health: A Political Choice*. Global  
18 Governance Project, University of Toronto and World Health Organization; 2019. p.  
19 46–7.  
20  
21 75. Edmonds S, Hajizadeh M. Assessing progressivity and catastrophic effect of out-of-  
22 pocket payments for healthcare in Canada: 2010–2015. *Eur J Health Econ*. 2019  
23 Sep;20(7):1001–11.  
24  
25  
26 76. Gaffney A, McCormick D. The Affordable Care Act: implications for health-care equity.  
27 *The Lancet*. 2017 Apr;389(10077):1442–52.  
28  
29 77. Allin S, Farmer J, Quiñonez C, Peckham A, Marchildon G, Panteli D, et al. Do health  
30 systems cover the mouth? Comparing dental care coverage for older adults in eight  
31 jurisdictions. *Health Policy*. 2020 Sep;124(9):998–1007.  
32  
33  
34 78. Martin D, Miller AP, Quesnel-Vallée A, Caron NR, Vissandjée B, Marchildon GP.  
35 Canada's universal health-care system: achieving its potential. *The Lancet*. 2018  
36 Apr;391(10131):1718–35.  
37  
38 79. Morrison A, Canadian Agency for Drugs and Technologies in Health. English-language  
39 restriction when conducting systematic review-based meta-analyses: systematic  
40 review of published studies [Internet]. Ottawa, Ont.: Canadian Agency for Drugs and  
41 Technologies in Health.; 2009 [cited 2018 Nov 14]. Available from:  
42 <http://www.deslibris.ca/ID/217227>  
43  
44  
45  
46  
47  
48  
49  
50  
51  
52  
53  
54  
55  
56  
57  
58  
59  
60

## Tables and figures

### Tables

**Table 1.** Characteristics of the included studies

**Table 2.** Summary of the characteristics of the included studies

**Table 3.** Evidence gaps identified from the literature

### Figures

**Figure 1.** PRISMA study selection flowchart

**Figure 2.** Concept map of financial risk protection interventions, impacts, evidence gaps, and methodological considerations

**Table 1.** Characteristics of the included studies

| Study                 | Study design                    | Resource level | Geographic scope         | FRP defined? | FRP interventions | FRP measures   | No. studies                 | No. databases       | Study period |
|-----------------------|---------------------------------|----------------|--------------------------|--------------|-------------------|----------------|-----------------------------|---------------------|--------------|
| Acharya 2012 (56)     | Systematic review               | LMIC           | PAR, AFR, SEAR, EUR, WPR | No           | PA                | OOPE, CHE      | 24                          | 10 academic, 3 grey | ≤2010        |
| Adebayo 2015 (40)     | Systematic review               | LMIC           | PAR, AFR, SEAR, WPR      | No           | EC                | OOPE           | 25                          | 17                  | 2003-2013    |
| Angell 2019 (55)      | Systematic review, Delphi panel | LMIC, HIC      | SEAR, WPR                | No           | PA                | OOPE, CHE      | 31 studies, 10 grey reports | 3 academic, 14 grey | 2008-2018    |
| Bellows 2013 (62)     | Narrative review                | LMIC           | AFR, EMR, EUR, WPR       | No           | FI                | NS             | 28 voucher programs         | NS                  | 1995-2011    |
| Bright 2017 (30)      | Systematic review               | LMIC           | PAR, AFR, SEAR, WPR      | Yes          | FI                | NS             | 57                          | 4                   | ≤2015        |
| Bucagu 2012 (59)      | Systematic review               | LMIC           | AFR                      | No           | EC                | CHE            | 14                          | 1                   | 2005-2011    |
| Comfort 2013 (46)     | Systematic review               | LMIC           | PAR, AFR, SEAR, EUR, WPR | Yes          | EC, FI            | NS             | 29                          | NS                  | 1997-2012    |
| Docrat 2020 (39)      | Systematic review               | LMIC           | PAR, AFR, SEAR, WPR      | No           | EC                | OOPE           | 18                          | 9                   | ≤2018        |
| Erlangga 2019 (52)    | Systematic review               | LMIC           | PAR, AFR, SEAR, WPR      | No           | EC                | OOPE, CHE, IHE | 68                          | 5 academic, 3 grey  | 2010-2016    |
| Fadlallah 2018 (33)   | Systematic review               | LMIC           | PAR, AFR, SEAR, EUR, WPR | Yes          | EC                | OOPE           | 51                          | 6                   | 1992-2015    |
| Grainger 2014 (63)    | Narrative review                | LMIC           | PAR, AFR, SEAR, WPR      | No           | FI                | NS             | 40 voucher programs         | NS                  | ≤2011        |
| Hunter 2017 (49)      | Systematic review               | LMIC           | PAR, AFR, SEAR, WPR      | No           | FI                | OOPE           | 98                          | 19                  | 1990-2015    |
| Izzanie 2019 (42)     | Systematic review               | LMIC           | SEAR, WPR                | No           | EC                | OOPE, CHE, IHE | 13                          | 4                   | 1993-2017    |
| Koch 2017(43)         | Systematic review               | LMIC           | PAR                      | Yes          | EC                | OOPE, CHE, IHE | 16                          | 3                   | 2008-2015    |
| Lagomarsino 2012 (44) | Comparative analysis            | LMIC           | AFR, SEAR, WPR           | Yes          | PA, EC, FI        | OOPE, IHE      | NS                          | 3                   | NS           |

|    |                      |                           |           |                          |     |    |                |     |     |           |
|----|----------------------|---------------------------|-----------|--------------------------|-----|----|----------------|-----|-----|-----------|
| 1  |                      |                           |           |                          |     |    |                |     |     |           |
| 2  |                      |                           |           |                          |     |    |                |     |     |           |
| 3  |                      |                           |           |                          |     |    |                |     |     |           |
| 4  | Mathauer 2019 (54)   | Comparative analysis      | NS        | NS                       | No  | PA | OOPE           | NS  | 2   | NS        |
| 5  | Meng 2011 (61)       | Systematic review         | LMIC, HIC | PAR, AFR, SEAR, WPR      | No  | EC | NS             | 86  | 45  | 1995-2007 |
| 6  | Myint 2019 (36)      | Systematic review         | LMIC, HIC | SEAR, WPR                | No  | PA | OOPE, CHE      | 77  | 2   | 2010-2017 |
| 7  | Njagi 2018 (38)      | Scoping review            | LMIC      | AFR                      | Yes | NS | CHE, IHE       | 34  | 5   | 2006-2017 |
| 8  | Odeyemi 2014 (58)    | Systematic review         | LMIC      | AFR                      | No  | EC | CHE            | 26  | 2   | 2003-2012 |
| 9  | Odeyemi 2013 (51)    | Comparative analysis      | LMIC      | AFR                      | No  | EC | OOPE           | 16  | 3   | 2000-2012 |
| 10 | Okedo-Alex 2019 (50) | Systematic review         | LMIC      | AFR                      | Yes | EC | CHE            | 20  | 5   | 2003-2018 |
| 11 | Okem 2015 (48)       | Systematic review         | LMIC      | EUR                      | Yes | EC | OOPE           | 76  | ≥10 | 2000-2012 |
| 12 | Okoroh 2018 (45)     | Systematic review         | LMIC      | AFR                      | Yes | EC | OOPE, CHE      | 7   | 6   | 2003-2017 |
| 13 | Prinja 2017 (35)     | Systematic review         | LMIC      | SEAR                     | No  | EC | OOPE, CHE      | 14  | 4   | 2005-2015 |
| 14 | Rezaei 2019 (53)     | Meta-analysis             | LMIC      | EMR                      | Yes | NS | CHE            | 24  | 6   | 2001-2015 |
| 15 | Salmi 2017 (60)      | Systematic review, survey | LMIC, HIC | EUR                      | No  | EC | NS             | 108 | 4   | 2000-2010 |
| 16 | Sanogo 2019 (41)     | Systematic review         | LMIC      | PAR, AFR, SEAR, EUR, WPR | No  | EC | NS             | 12  | 4   | 2005-2018 |
| 17 | Spaan 2012 (57)      | Systematic review         | LMIC      | AFR, WPR, SEAR           | No  | PA | NS             | 159 | 19  | ≤2011     |
| 18 | Sum 2018 (37)        | Systematic review         | LMIC, HIC | PAR, WPR, SEAR           | Yes | NS | OOPE           | 14  | 5   | 2000-2016 |
| 19 | Uzochukwu 2015 (34)  | Systematic review         | LMIC      | AFR                      | Yes | PA | OOPE, IHE      | NS  | 6   | 2009-2014 |
| 20 | van Hees 2019 (32)   | Systematic review         | LMIC      | PAR, AFR, SEAR, WPR      | Yes | EC | CHE            | 44  | 11  | 1995-2018 |
| 21 | van Minh 2014 (47)   | Narrative review          | LMIC, HIC | SEAR, WPR                | Yes | NS | OOPE, CHE, IHE | NS  | 8   | 1995-2017 |
| 22 |                      |                           |           |                          |     |    |                |     |     |           |
| 23 |                      |                           |           |                          |     |    |                |     |     |           |
| 24 |                      |                           |           |                          |     |    |                |     |     |           |
| 25 |                      |                           |           |                          |     |    |                |     |     |           |
| 26 |                      |                           |           |                          |     |    |                |     |     |           |
| 27 |                      |                           |           |                          |     |    |                |     |     |           |
| 28 |                      |                           |           |                          |     |    |                |     |     |           |
| 29 |                      |                           |           |                          |     |    |                |     |     |           |
| 30 |                      |                           |           |                          |     |    |                |     |     |           |
| 31 |                      |                           |           |                          |     |    |                |     |     |           |
| 32 |                      |                           |           |                          |     |    |                |     |     |           |
| 33 |                      |                           |           |                          |     |    |                |     |     |           |
| 34 |                      |                           |           |                          |     |    |                |     |     |           |
| 35 |                      |                           |           |                          |     |    |                |     |     |           |
| 36 |                      |                           |           |                          |     |    |                |     |     |           |
| 37 |                      |                           |           |                          |     |    |                |     |     |           |
| 38 |                      |                           |           |                          |     |    |                |     |     |           |
| 39 |                      |                           |           |                          |     |    |                |     |     |           |
| 40 |                      |                           |           |                          |     |    |                |     |     |           |
| 41 |                      |                           |           |                          |     |    |                |     |     |           |
| 42 |                      |                           |           |                          |     |    |                |     |     |           |
| 43 |                      |                           |           |                          |     |    |                |     |     |           |
| 44 |                      |                           |           |                          |     |    |                |     |     |           |
| 45 |                      |                           |           |                          |     |    |                |     |     |           |
| 46 |                      |                           |           |                          |     |    |                |     |     |           |
| 47 |                      |                           |           |                          |     |    |                |     |     |           |



|                         |                      |           |                        |     |        |                   |    |    |           |
|-------------------------|----------------------|-----------|------------------------|-----|--------|-------------------|----|----|-----------|
| Wiysonge<br>2017 (29)   | Cochrane<br>review   | LMIC      | PAR, AFR,<br>SEAR, WPR | Yes | PA, FI | OOPE, CHE         | 15 | 20 | 2005-2016 |
| Yerramilli<br>2018 (31) | Systematic<br>review | LMIC, HIC | EUR                    | Yes | NS     | OOPE, CHE,<br>IHE | 54 | 4  | 1990-2017 |

Abbreviations: African region, AFR; catastrophic health expenditure, CHE; financial incentives, FI; financial risk protection, FRP; Eastern Mediterranean region, EMR; European region, EUR; expanding coverage, EC; high-income countries, HIC; impoverishing health expenditures, IHE; low- and middle-income countries, LMIC; not specified, NS; out-of-pocket expenditures, OOPE; Pan American region, PAR; pooling arrangements, PA; South East Asian region, SEAR; Western Pacific region, WPR; World Health Organization, WHO

For peer review only

**Table 2.** Summary of the characteristics of the included studies

| Study characteristic         | No. (%)<br>(N = 35) | References                                           |
|------------------------------|---------------------|------------------------------------------------------|
| <b>Publication year</b>      |                     |                                                      |
| 1995-1999                    | 0 (0)               | -                                                    |
| 2000-2004                    | 0 (0)               | -                                                    |
| 2005-2009                    | 0 (0)               | -                                                    |
| 2010-2014                    | 11 (31)             | (44,46,47,51,56-59,61-63)                            |
| ≥2015                        | 24 (69)             | (29-43,45,48-50,52-55,60)                            |
| <b>Study period*</b>         |                     |                                                      |
| 1990-1994                    | 9 (26)              | (30,31,33,39,42,49,56,57,63)                         |
| 1995-1999                    | 14 (40)             | (30-33,39,42,46,47,49,56,57,61-63)                   |
| 2000-2004                    | 23 (66)             | (30-33,37,39,40,42,45-51,53,56-58,60-63)             |
| 2005-2009                    | 30 (86)             | (29-35,37-43,45-51,53,55-63)                         |
| 2010-2018                    | 33 (94)             | (29-43,45-53,55-63)                                  |
| Not specified                | 2 (6)               | (44,54)                                              |
| <b>Resource level</b>        |                     |                                                      |
| LMIC                         | 27 (77)             | (29,30,32-35,38-46,48-53,56-59,62,63)                |
| HIC                          | 0 (0)               | -                                                    |
| LMIC and HIC                 | 7 (20)              | (31,36,37,47,55,60,61)                               |
| Not specified                | 1 (3)               | (54)                                                 |
| <b>Geographic scope*</b>     |                     |                                                      |
| African region               | 23 (66)             | (29,30,32-34,38,40,41,44-46,49-52,56-59,61-63)       |
| European region              | 8 (23)              | (31,33,41,46,48,56,60,62)                            |
| Eastern-Mediterranean region | 2 (6)               | (53,62)                                              |
| South-East Asian region      | 21 (60)             | (29,30,32,33,35-37,39-42,44,46,47,49,52,55-57,61,63) |
| Western-Pacific region       | 21 (60)             | (29,30,32,33,36,37,39-42,44,46,47,49,52,55-57,61-63) |
| Pan-American region          | 15 (43)             | (29,30,32,33,37,39-41,43,46,49,52,56,61,63)          |
| ≥2 WHO regions               | 18 (51)             | (29,30,32,33,36,37,39-42,46,47,49,52,55,61-63)       |
| Not specified                | 1 (3)               | (54)                                                 |
| <b>Study design</b>          |                     |                                                      |
| Systematic review            | 26 (74)             | (30-37,39-43,45,46,48-50,52,55-61)                   |
| Narrative review             | 3 (9)               | (47,62,63)                                           |
| Meta-analysis                | 1 (3)               | (53)                                                 |
| Cochrane overview of reviews | 1 (3)               | (29)                                                 |
| Scoping review               | 1 (3)               | (38)                                                 |
| Comparative analysis         | 3 (9)               | (44,51,54)                                           |
| <b>Target population</b>     |                     |                                                      |
| Women and children           | 4 (13)              | (30,46,59,62)                                        |
| Poor or marginalized groups  | 4 (19)              | (32,41,58,61)                                        |

|                                                 |         |                                                         |
|-------------------------------------------------|---------|---------------------------------------------------------|
| Multimorbidity                                  | 1 (3)   | (37)                                                    |
| Mental health                                   | 1 (3)   | (39)                                                    |
| <b>Studies with concept definitions*</b>        |         |                                                         |
| Defined universal health coverage               | 23 (65) | (29,30,32–36,39–47,50–54,62,63)                         |
| Defined financial risk protection               | 16 (46) | (29–40,42–44)                                           |
| Defined equity                                  | 13 (37) | (31,32,36,37,41–43,45,51,55,60,61,63)                   |
| <b>Financial risk protection measures*</b>      |         |                                                         |
| Out-of-pocket expenditures                      | 21 (60) | (29,31,33–37,39,40,42–45,47–49,51,52,54–56)             |
| Catastrophic health expenditures                | 17 (49) | (29,31,32,35,36,38,42,43,45,47,47,50,52,53,55,56,58,59) |
| Impoverishing health expenditures               | 8 (23)  | (31,34,38,42–44,47,52)                                  |
| <b>Financial risk protection interventions*</b> |         |                                                         |
| Pooling arrangements                            | 8 (23)  | (29,34,36,44,54–57)                                     |
| Expanding insurance coverage                    | 19 (54) | (32,33,35,39–46,48,50–52,58–61)                         |
| Financial incentives                            | 7 (20)  | (29,30,44,46,49,62,63)                                  |

\*Overlapping categories

Abbreviations: high-income countries, HIC; low- and middle-income countries, LMIC; World Health Organization, WHO

**Table 3.** Evidence gaps identified from the literature

| Category<br>No. (%)                      | Specific evidence need                                                                                                                                                                                                                                                                                                                                                                                                                                                              | References                   |
|------------------------------------------|-------------------------------------------------------------------------------------------------------------------------------------------------------------------------------------------------------------------------------------------------------------------------------------------------------------------------------------------------------------------------------------------------------------------------------------------------------------------------------------|------------------------------|
|                                          | <i>Impact on health service utilization</i>                                                                                                                                                                                                                                                                                                                                                                                                                                         | (29,39,43,44,46,49,52,56,57) |
|                                          | <ul style="list-style-type: none"> <li>Understand how pooling arrangements, expansion of insurance coverage, and financial incentives affect overall health service use and specific health service types, including unintended outcomes (e.g., incentivizing inappropriate over- or underutilization of services)</li> </ul>                                                                                                                                                       |                              |
|                                          | <i>Impact on financial risk</i>                                                                                                                                                                                                                                                                                                                                                                                                                                                     | (31,35,37,38,43,45,52,55,56) |
| Evidence of effectiveness<br>N = 16 (46) | <ul style="list-style-type: none"> <li>Understand how pooling arrangements, expansion of insurance coverage, and financial incentives affect OOPE, CHE, and IHE</li> <li>Understand how pooling arrangements, expansion of insurance coverage, and financial incentives affect OOPE, CHE, and IHE related to specific health services, chronic health conditions and multimorbidity, non-medical services, or spending on premiums and entry fees into insurance schemes</li> </ul> |                              |
|                                          | <i>Impact on experience of care</i>                                                                                                                                                                                                                                                                                                                                                                                                                                                 | (41,45,63)                   |
|                                          | <ul style="list-style-type: none"> <li>Understand how pooling arrangements, expansion of insurance coverage, and financial incentives affect people's experiences with the healthcare system</li> </ul>                                                                                                                                                                                                                                                                             |                              |
|                                          | <i>Impact on health status</i>                                                                                                                                                                                                                                                                                                                                                                                                                                                      | (29,46,52,55–57,62,63)       |
|                                          | <ul style="list-style-type: none"> <li>Understand how pooling arrangements, expansion of insurance coverage, and financial incentives affect population health outcomes, including morbidity, mortality, disability, and measures of utility (e.g., QALYs, DALYs)</li> </ul>                                                                                                                                                                                                        |                              |
|                                          | <i>Stratification of FRP program coverage</i>                                                                                                                                                                                                                                                                                                                                                                                                                                       | (44,56,57,63)                |
|                                          | <ul style="list-style-type: none"> <li>Consider proportion of population covered or served by FRP intervention that is experiencing marginalization</li> </ul>                                                                                                                                                                                                                                                                                                                      |                              |
| Equity considerations<br>N = 13 (37)     | <i>Stratification of FRP indicators and other outcomes</i>                                                                                                                                                                                                                                                                                                                                                                                                                          | (29–32,38,39,56,57,60)       |
|                                          | <ul style="list-style-type: none"> <li>Consider the distribution of OOPE, CHE, and IHE across marginalized groups to understand whether FRP intervention efforts are equitable</li> <li>Consider stratification of health service utilization, experience of care, and health status across marginalized groups to understand whether FRP intervention efforts are equitable</li> </ul>                                                                                             |                              |
| Evidence of cost-                        | <i>Estimating resource requirements and input costs</i>                                                                                                                                                                                                                                                                                                                                                                                                                             | (45,49,55,62)                |

N = 8 (23)

- Estimate start-up, operating, and scale-up costs of FRP interventions using standard methods to enable comparability between programs

*Mobilizing and managing resources*

(34,44,55)

- Identify optimal strategies to mobilize and finance FRP interventions
- Identify optimal strategies to manage resources once FRP interventions are funded

*Establishing cost-effectiveness*

(30,49,55,62,63)

- Estimate gains in utilization, FRP, experience of care, or health status relative to resource needs
- Compare cost-effectiveness between FRP interventions

Abbreviations: catastrophic health expenditures, CHE; disability-adjusted life years, DALYs; financial risk protection, FRP; impoverishing health expenditures, IHE; out-of-pocket expenditures, OOPE; quality-adjusted life years, QALYs; universal health coverage, UHC

**Figure 1.** PRISMA study selection flowchart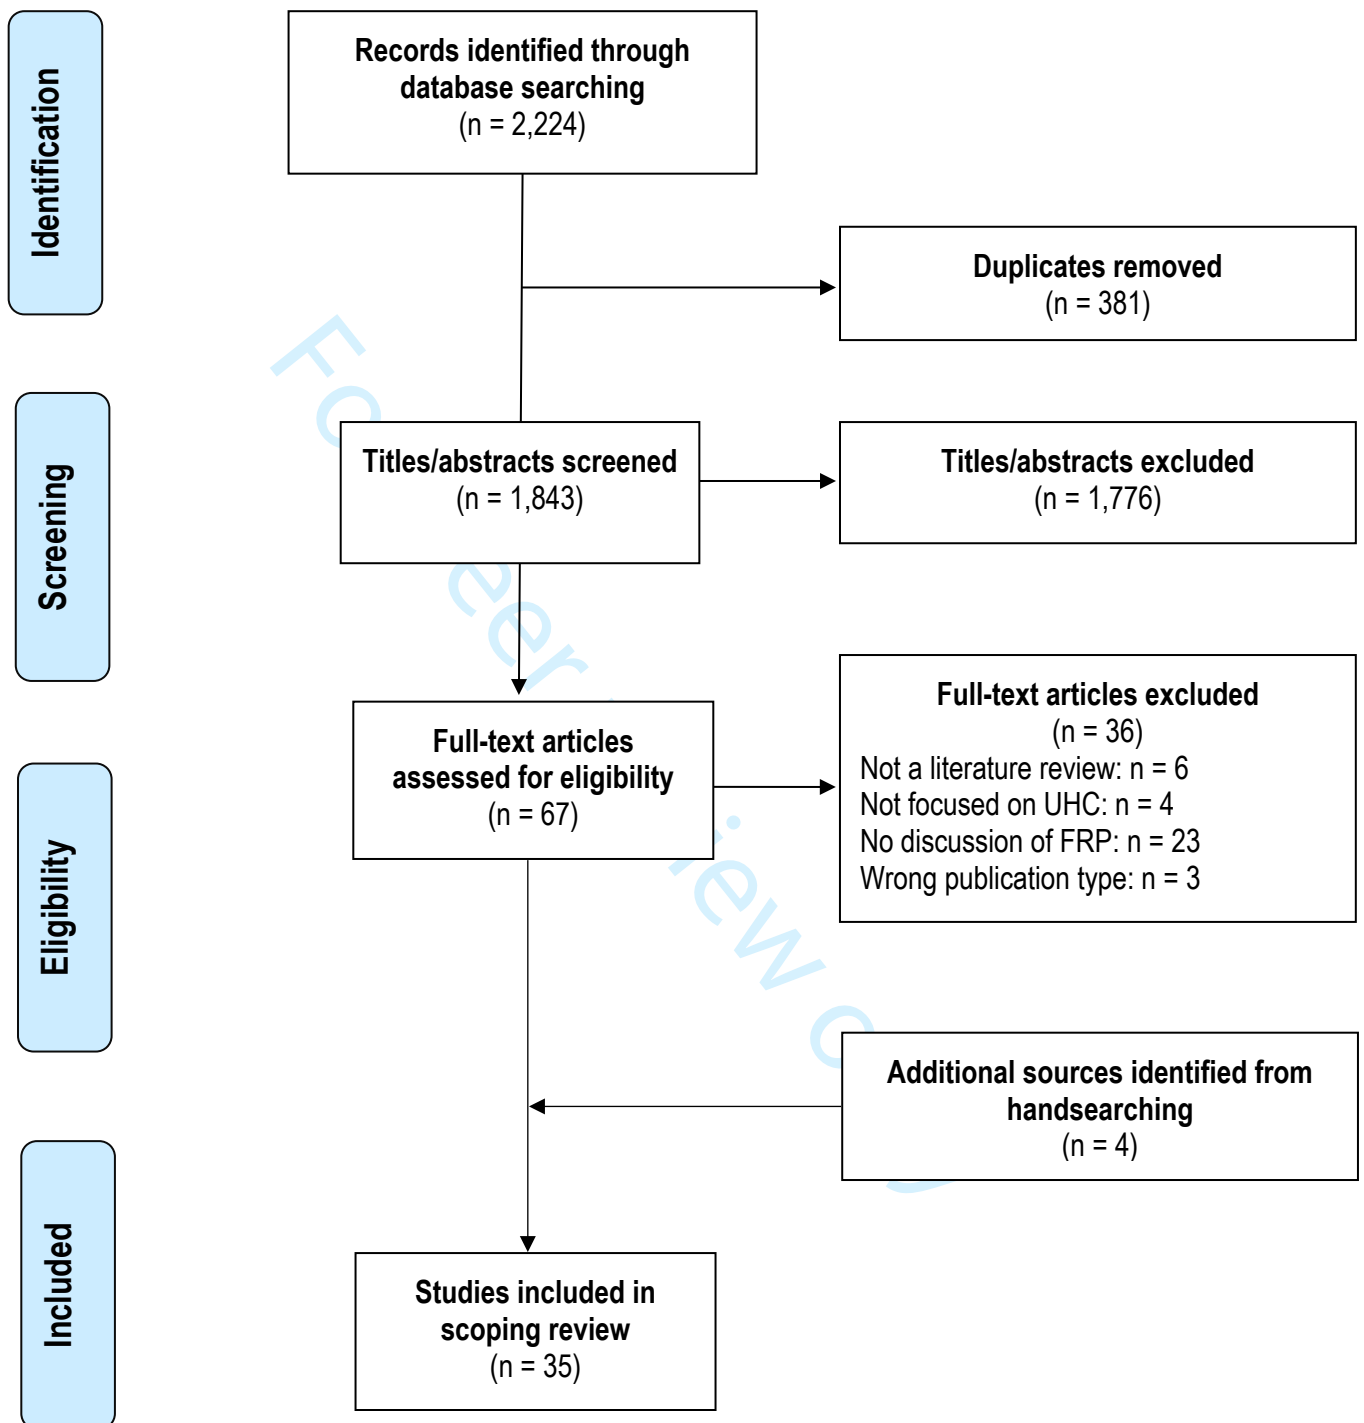

Figure 2. Concept map of financial risk protection interventions, impacts, evidence gaps, and methodological considerations

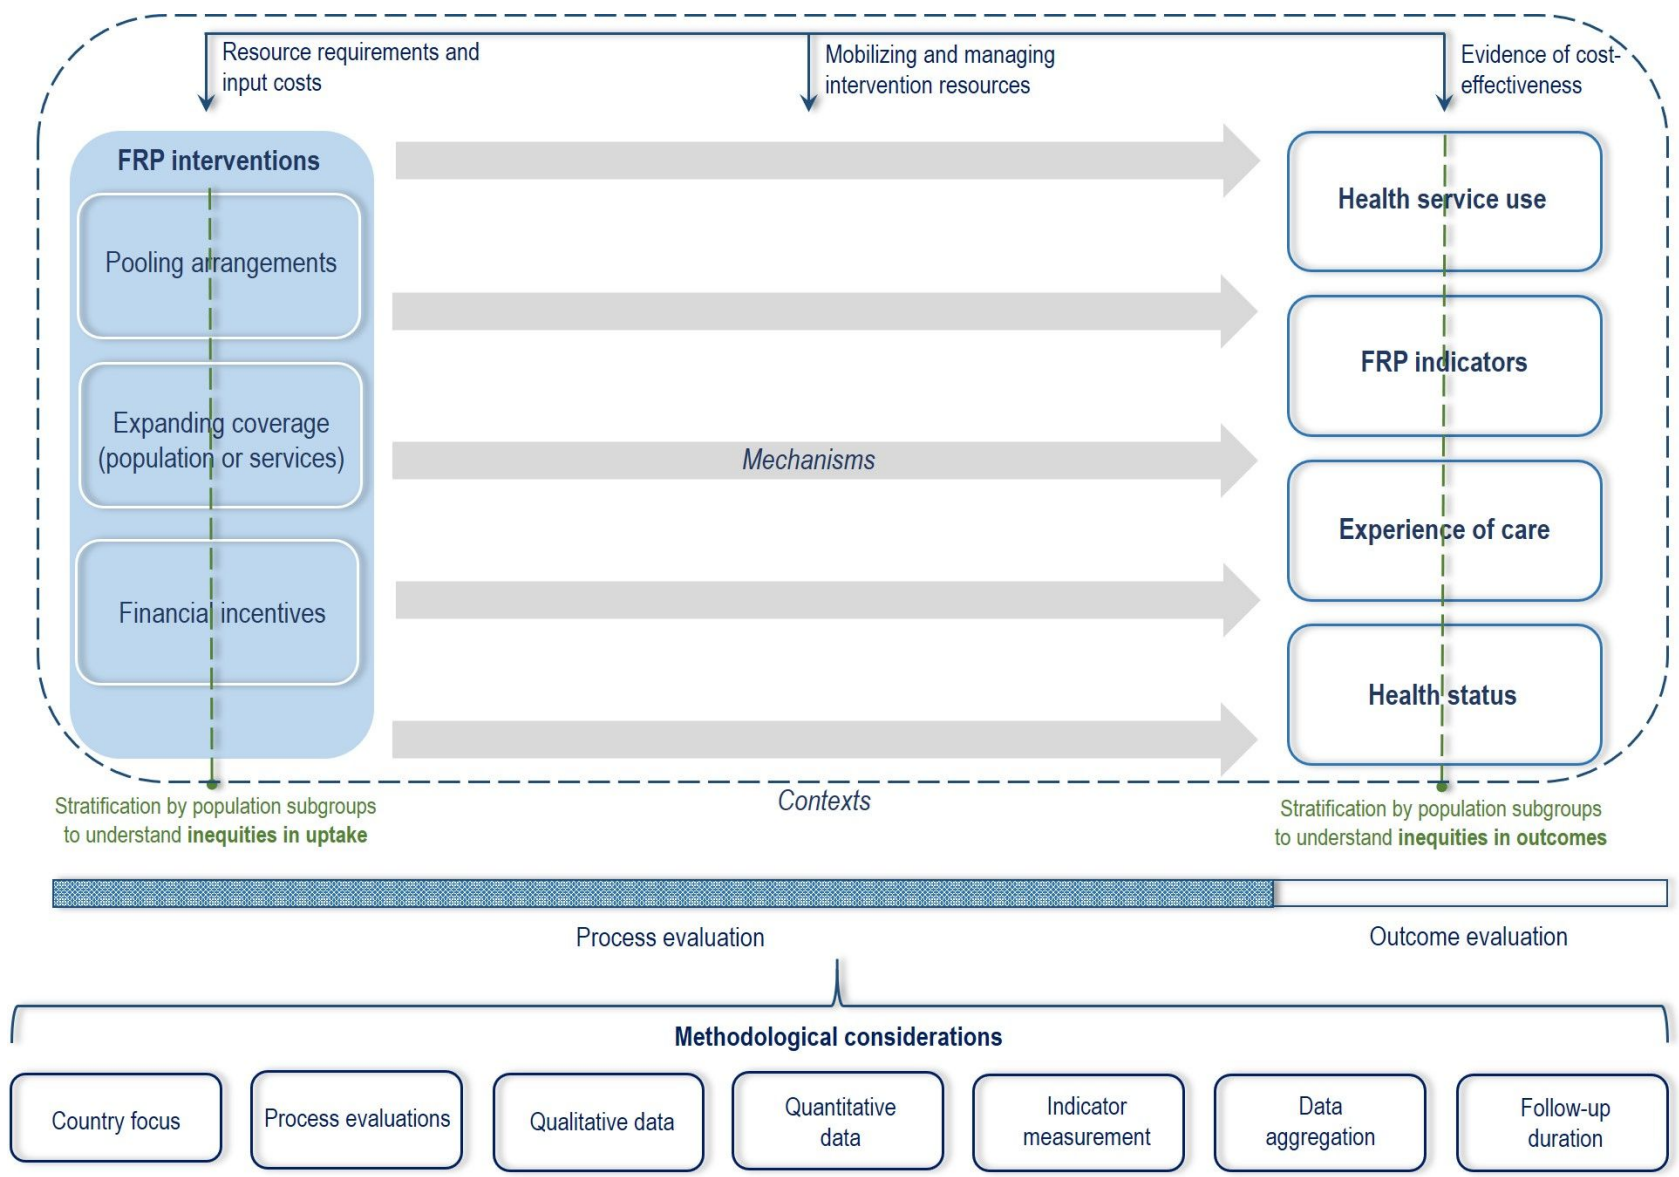

1  
2  
3 **Supplementary material**  
4

5 **Supplementary file 1.** Search strategy in Ovid MEDLINE

6 **Supplementary file 2.** Detailed eligibility criteria for scoping review  
7

8  
9 **Checklist.** PRISMA-ScR reporting checklist  
10  
11  
12  
13  
14  
15  
16  
17  
18  
19  
20  
21  
22  
23  
24  
25  
26  
27  
28  
29  
30  
31  
32  
33  
34  
35  
36  
37  
38  
39  
40  
41  
42  
43  
44  
45  
46  
47  
48  
49  
50  
51  
52  
53  
54  
55  
56  
57  
58  
59  
60

For peer review only



Supplementary file 1. Search strategy in Ovid MEDLINE (last updated April 29, 2020)

| <b>Ovid MEDLINE: Epub Ahead of Print, In-Process &amp; Other Non-Indexed Citations, Ovid MEDLINE® Daily and Ovid MEDLINE® &lt;1946-Present&gt; (n = 1,045)</b> |                                                                                                                                                                                                                                                                                                                                                                                                                                                                                                                                                                                                                                                                                                                  |                  |
|----------------------------------------------------------------------------------------------------------------------------------------------------------------|------------------------------------------------------------------------------------------------------------------------------------------------------------------------------------------------------------------------------------------------------------------------------------------------------------------------------------------------------------------------------------------------------------------------------------------------------------------------------------------------------------------------------------------------------------------------------------------------------------------------------------------------------------------------------------------------------------------|------------------|
| <b>#</b>                                                                                                                                                       | <b>Searches</b>                                                                                                                                                                                                                                                                                                                                                                                                                                                                                                                                                                                                                                                                                                  | <b># Results</b> |
| 1                                                                                                                                                              | exp Insurance Coverage/                                                                                                                                                                                                                                                                                                                                                                                                                                                                                                                                                                                                                                                                                          | 16473            |
| 2                                                                                                                                                              | (UHC or ((universal or population or public or national or essential or social) adj4 (coverage or benefit* or insurance or care or healthcare or health care or health-care or health servic* or medicin*))).tw,kf.                                                                                                                                                                                                                                                                                                                                                                                                                                                                                              | 169251           |
| 3                                                                                                                                                              | 1 or 2                                                                                                                                                                                                                                                                                                                                                                                                                                                                                                                                                                                                                                                                                                           | 181722           |
| 4                                                                                                                                                              | (financial adj3 (protection or risk or coverage or risk-sharing or hardship or assist* or barrier* or access)).tw,kf.                                                                                                                                                                                                                                                                                                                                                                                                                                                                                                                                                                                            | 6425             |
| 5                                                                                                                                                              | (financing adj3 (health or healthcare or health care or health-care or health service* or medicin*)).tw,kf.                                                                                                                                                                                                                                                                                                                                                                                                                                                                                                                                                                                                      | 5340             |
| 6                                                                                                                                                              | (cost-sharing or cost sharing or social health protection or social protection in health or social health promotion or reimbursement incentive* or monetary incentive* or cash transfer or cash transfers or cash grant or cash grants or monetary grant or monetary grants or non-monetary grant or non-monetary grants or non monetary grant or non monetary grants or social welfare or social assist* or social grant or social grants or social safety net or social safety-net or sociali?ed healthcare or sociali?ed health care or sociali?ed health-care or social security or health security or healthcare security or health care security or health-care security or public welfare servic*).tw,kf. | 19277            |
| 7                                                                                                                                                              | 4 or 5 or 6                                                                                                                                                                                                                                                                                                                                                                                                                                                                                                                                                                                                                                                                                                      | 30210            |
| 8                                                                                                                                                              | Vulnerable populations/ or exp Socioeconomic Factors/ or Healthcare Disparities/ or Health Status Disparities/ or Poverty Areas/ or Urban Population/ or "Social Determinants of Health"/                                                                                                                                                                                                                                                                                                                                                                                                                                                                                                                        | 511247           |
| 9                                                                                                                                                              | (health adj3 (gap or gaps or gradient* or hierarch*)).tw,kf.                                                                                                                                                                                                                                                                                                                                                                                                                                                                                                                                                                                                                                                     | 3606             |
| 10                                                                                                                                                             | (equit* or inequit* or inequalit* or disparit* or equality).tw,kf.                                                                                                                                                                                                                                                                                                                                                                                                                                                                                                                                                                                                                                               | 126400           |
| 11                                                                                                                                                             | ((social* or socio-economic or socioeconomic or economic or structural or material) adj3 (advantage* or disadvantage* or exclude* or exclusion or include* or inclusion or status or position or gradient* or hierarch* or class* or determinant* or vulnerab* or insecurit*)).tw,kf.                                                                                                                                                                                                                                                                                                                                                                                                                            | 128011           |
| 12                                                                                                                                                             | (SES or SEP or sociodemographic* or socio-demographic* or income or wealth* or poverty or educational level or level of education or educational attainment or well educated or better educated or unemploy* or home owner* or tenure or affluen* or well off or better off or worse off).tw,kf.                                                                                                                                                                                                                                                                                                                                                                                                                 | 286812           |
| 13                                                                                                                                                             | (poverty or precar* or impoverish* or depriv* or destitut* or marginalis* or marginaliz* or indigen* or low-income or low income).tw,kf.                                                                                                                                                                                                                                                                                                                                                                                                                                                                                                                                                                         | 191177           |
| 14                                                                                                                                                             | ((out-of-pocket or out of pocket or catastrophic) adj4 (spend* or expend* or cost* or expens* or payment*)).tw,kf.                                                                                                                                                                                                                                                                                                                                                                                                                                                                                                                                                                                               | 5467             |
| 15                                                                                                                                                             | 8 or 9 or 10 or 11 or 12 or 13 or 14                                                                                                                                                                                                                                                                                                                                                                                                                                                                                                                                                                                                                                                                             | 937614           |
| 16                                                                                                                                                             | 3 and 7                                                                                                                                                                                                                                                                                                                                                                                                                                                                                                                                                                                                                                                                                                          | 6347             |
| 17                                                                                                                                                             | 3 and 15                                                                                                                                                                                                                                                                                                                                                                                                                                                                                                                                                                                                                                                                                                         | 41528            |
| 18                                                                                                                                                             | 16 or 17                                                                                                                                                                                                                                                                                                                                                                                                                                                                                                                                                                                                                                                                                                         | 44386            |
| 19                                                                                                                                                             | Meta-Analysis as Topic/                                                                                                                                                                                                                                                                                                                                                                                                                                                                                                                                                                                                                                                                                          | 17769            |
| 20                                                                                                                                                             | meta analy\$.tw.                                                                                                                                                                                                                                                                                                                                                                                                                                                                                                                                                                                                                                                                                                 | 168560           |
| 21                                                                                                                                                             | metaanaly\$.tw.                                                                                                                                                                                                                                                                                                                                                                                                                                                                                                                                                                                                                                                                                                  | 2049             |
| 22                                                                                                                                                             | Meta-Analysis/                                                                                                                                                                                                                                                                                                                                                                                                                                                                                                                                                                                                                                                                                                   | 113810           |

|    |                                                 |          |
|----|-------------------------------------------------|----------|
| 23 | (systematic adj (review\$1 or overview\$1)).tw. | 166886   |
| 24 | exp Review Literature as Topic/                 | 13560    |
| 25 | 19 or 20 or 21 or 22 or 23 or 24                | 295552   |
| 26 | cochrane.ab.                                    | 81387    |
| 27 | cochrane.ab.                                    | 81387    |
| 28 | (psychlit or psyclit).ab.                       | 917      |
| 29 | (psychinfo or psycinfo).ab.                     | 34763    |
| 30 | (cinahl or cinhal).ab.                          | 27697    |
| 31 | science citation index.ab.                      | 3106     |
| 32 | bids.ab.                                        | 523      |
| 33 | cancerlit.ab.                                   | 630      |
| 34 | 26 or 27 or 28 or 29 or 30 or 31 or 32 or 33    | 118658   |
| 35 | reference list\$.ab.                            | 17743    |
| 36 | bibliograph\$.ab.                               | 17890    |
| 37 | hand-search\$.ab.                               | 6841     |
| 38 | relevant journals.ab.                           | 1167     |
| 39 | manual search\$.ab.                             | 4393     |
| 40 | 35 or 36 or 37 or 38 or 39                      | 43046    |
| 41 | selection criteria.ab.                          | 30113    |
| 42 | data extraction.ab.                             | 20665    |
| 43 | 41 or 42                                        | 48490    |
| 44 | Review/                                         | 2637301  |
| 45 | 43 and 44                                       | 29227    |
| 46 | Comment/                                        | 842745   |
| 47 | Letter/                                         | 1072443  |
| 48 | Editorial/                                      | 525373   |
| 49 | animal/                                         | 6593170  |
| 50 | human/                                          | 18427932 |
| 51 | 49 not (49 and 50)                              | 4659940  |
| 52 | 46 or 47 or 48 or 51                            | 6424847  |
| 53 | 25 or 34 or 40 or 45                            | 351311   |
| 54 | 53 not 52                                       | 333353   |
| 55 | 18 and 54                                       | 1081     |
| 56 | limit 55 to (english or french)                 | 1052     |
| 57 | limit 56 to yr="1995 -Current"                  | 1045     |

1  
2  
3 **Supplementary file 2.** Eligibility criteria for scoping review  
4

5  
6  
7  
8  
9  
10  
11  
12  
13  
14  
15  
16  
17  
18  
19  
20  
21  
22  
23  
24  
25  
26  
27  
28  
29  
30  
31  
32  
33  
34  
35  
36  
37  
38  
39  
40  
41  
42  
43  
44  
45  
46  
47  
48  
49  
50  
51  
52  
53  
54  
55  
56  
57  
58  
59  
60

| <b>Criterion</b>                         | <b>Definition for inclusion</b>                                                                                                                                                                                                                                            | <b>Definition for exclusion</b>                                                                             |
|------------------------------------------|----------------------------------------------------------------------------------------------------------------------------------------------------------------------------------------------------------------------------------------------------------------------------|-------------------------------------------------------------------------------------------------------------|
| Research design                          | Study methodology is a literature review (e.g., narrative, systematic, scoping, rapid, comparative, or realist reviews, including syntheses of quantitative, qualitative, or mixed methods data). Reviews could be combined with other methodologies (e.g., Delphi panel). | Study designs other than literature reviews.                                                                |
| Focus on universal health coverage (UHC) | Study is focused on UHC, where UHC is of central interest to the article.                                                                                                                                                                                                  | Study incidentally mentions UHC, but it is not the focus of the article.                                    |
| Focus on financial risk protection       | Study discusses interventions aimed at minimizing health-related financial risk and/or financial risk protection indicators or outcomes.                                                                                                                                   | Study does not discuss financial risk protection interventions/mechanisms or indicators/outcomes.           |
| Language                                 | Study is written in English or French.                                                                                                                                                                                                                                     | Studies in any language other than English or French.                                                       |
| Time frame                               | Study is published in or after 1995.                                                                                                                                                                                                                                       | Any studies published before 1995.                                                                          |
| Type of publication                      | Study is an original published work that has undergone peer-review.                                                                                                                                                                                                        | Conference abstracts, posters, editorials, thesis dissertations, technical reports, or books/book chapters. |
| Availability                             | Full text is accessible through the University of Toronto library services                                                                                                                                                                                                 |                                                                                                             |

## Checklist. Preferred Reporting Items for Systematic reviews and Meta-Analyses extension for Scoping Reviews (PRISMA-ScR) reporting checklist

| SECTION                                               | ITEM | PRISMA-ScR CHECKLIST ITEM                                                                                                                                                                                                                                                                                  | REPORTED ON PAGE # |
|-------------------------------------------------------|------|------------------------------------------------------------------------------------------------------------------------------------------------------------------------------------------------------------------------------------------------------------------------------------------------------------|--------------------|
| <b>TITLE</b>                                          |      |                                                                                                                                                                                                                                                                                                            |                    |
| Title                                                 | 1    | Identify the report as a scoping review.                                                                                                                                                                                                                                                                   | 1                  |
| <b>ABSTRACT</b>                                       |      |                                                                                                                                                                                                                                                                                                            |                    |
| Structured summary                                    | 2    | Provide a structured summary that includes (as applicable): background, objectives, eligibility criteria, sources of evidence, charting methods, results, and conclusions that relate to the review questions and objectives.                                                                              | 2                  |
| <b>INTRODUCTION</b>                                   |      |                                                                                                                                                                                                                                                                                                            |                    |
| Rationale                                             | 3    | Describe the rationale for the review in the context of what is already known. Explain why the review questions/objectives lend themselves to a scoping review approach.                                                                                                                                   | 4                  |
| Objectives                                            | 4    | Provide an explicit statement of the questions and objectives being addressed with reference to their key elements (e.g., population or participants, concepts, and context) or other relevant key elements used to conceptualize the review questions and/or objectives.                                  | 4                  |
| <b>METHODS</b>                                        |      |                                                                                                                                                                                                                                                                                                            |                    |
| Protocol and registration                             | 5    | Indicate whether a review protocol exists; state if and where it can be accessed (e.g., a Web address); and if available, provide registration information, including the registration number.                                                                                                             | 5                  |
| Eligibility criteria                                  | 6    | Specify characteristics of the sources of evidence used as eligibility criteria (e.g., years considered, language, and publication status), and provide a rationale.                                                                                                                                       | 6                  |
| Information sources*                                  | 7    | Describe all information sources in the search (e.g., databases with dates of coverage and contact with authors to identify additional sources), as well as the date the most recent search was executed.                                                                                                  | 5                  |
| Search                                                | 8    | Present the full electronic search strategy for at least 1 database, including any limits used, such that it could be repeated.                                                                                                                                                                            | 5, Suppl. 1        |
| Selection of sources of evidence†                     | 9    | State the process for selecting sources of evidence (i.e., screening and eligibility) included in the scoping review.                                                                                                                                                                                      | 5,6                |
| Data charting process‡                                | 10   | Describe the methods of charting data from the included sources of evidence (e.g., calibrated forms or forms that have been tested by the team before their use, and whether data charting was done independently or in duplicate) and any processes for obtaining and confirming data from investigators. | 6                  |
| Data items                                            | 11   | List and define all variables for which data were sought and any assumptions and simplifications made.                                                                                                                                                                                                     | 6                  |
| Critical appraisal of individual sources of evidence§ | 12   | If done, provide a rationale for conducting a critical appraisal of included sources of evidence; describe the methods used and how this information was used in any data synthesis (if appropriate).                                                                                                      | NA                 |

| SECTION                                       | ITEM | PRISMA-ScR CHECKLIST ITEM                                                                                                                                                                       | REPORTED ON PAGE # |
|-----------------------------------------------|------|-------------------------------------------------------------------------------------------------------------------------------------------------------------------------------------------------|--------------------|
| Synthesis of results                          | 13   | Describe the methods of handling and summarizing the data that were charted.                                                                                                                    | 6                  |
| <b>RESULTS</b>                                |      |                                                                                                                                                                                                 |                    |
| Selection of sources of evidence              | 14   | Give numbers of sources of evidence screened, assessed for eligibility, and included in the review, with reasons for exclusions at each stage, ideally using a flow diagram.                    | 7                  |
| Characteristics of sources of evidence        | 15   | For each source of evidence, present characteristics for which data were charted and provide the citations.                                                                                     | 7                  |
| Critical appraisal within sources of evidence | 16   | If done, present data on critical appraisal of included sources of evidence (see item 12).                                                                                                      | NA                 |
| Results of individual sources of evidence     | 17   | For each included source of evidence, present the relevant data that were charted that relate to the review questions and objectives.                                                           | Table 1            |
| Synthesis of results                          | 18   | Summarize and/or present the charting results as they relate to the review questions and objectives.                                                                                            | 7-15, Tables 1-3   |
| <b>DISCUSSION</b>                             |      |                                                                                                                                                                                                 |                    |
| Summary of evidence                           | 19   | Summarize the main results (including an overview of concepts, themes, and types of evidence available), link to the review questions and objectives, and consider the relevance to key groups. | 15,16              |
| Limitations                                   | 20   | Discuss the limitations of the scoping review process.                                                                                                                                          | 17,18              |
| Conclusions                                   | 21   | Provide a general interpretation of the results with respect to the review questions and objectives, as well as potential implications and/or next steps.                                       | 18                 |
| <b>FUNDING</b>                                |      |                                                                                                                                                                                                 |                    |
| Funding                                       | 22   | Describe sources of funding for the included sources of evidence, as well as sources of funding for the scoping review. Describe the role of the funders of the scoping review.                 | 18                 |

JB1 = Joanna Briggs Institute; PRISMA-ScR = Preferred Reporting Items for Systematic reviews and Meta-Analyses extension for Scoping Reviews.

\* Where *sources of evidence* (see second footnote) are compiled from, such as bibliographic databases, social media platforms, and Web sites.

† A more inclusive/heterogeneous term used to account for the different types of evidence or data sources (e.g., quantitative and/or qualitative research, expert opinion, and policy documents) that may be eligible in a scoping review as opposed to only studies. This is not to be confused with *information sources* (see first footnote).

‡ The frameworks by Arksey and O'Malley (6) and Levac and colleagues (7) and the JBI guidance (4, 5) refer to the process of data extraction in a scoping review as data charting.

§ The process of systematically examining research evidence to assess its validity, results, and relevance before using it to inform a decision. This term is used for items 12 and 19 instead of "risk of bias" (which is more applicable to systematic reviews of interventions) to include and acknowledge the various sources of evidence that may be used in a scoping review (e.g., quantitative and/or qualitative research, expert opinion, and policy document).

From: Tricco AC, Lillie E, Zarin W, O'Brien KK, Colquhoun H, Levac D, et al. PRISMA Extension for Scoping Reviews (PRISMA-ScR): Checklist and Explanation. *Ann Intern Med.* 2018;169:467-473. doi: [10.7326/M18-0850](https://doi.org/10.7326/M18-0850).

# BMJ Open

## Identifying priorities for research on financial risk protection to achieve universal health coverage: A scoping overview of reviews

|                                 |                                                                                                                                                                                                                                                                                                                                                                                                                                                                                                                                                                                                                                                                                                                                                                     |
|---------------------------------|---------------------------------------------------------------------------------------------------------------------------------------------------------------------------------------------------------------------------------------------------------------------------------------------------------------------------------------------------------------------------------------------------------------------------------------------------------------------------------------------------------------------------------------------------------------------------------------------------------------------------------------------------------------------------------------------------------------------------------------------------------------------|
| Journal:                        | <i>BMJ Open</i>                                                                                                                                                                                                                                                                                                                                                                                                                                                                                                                                                                                                                                                                                                                                                     |
| Manuscript ID                   | bmjopen-2021-052041.R1                                                                                                                                                                                                                                                                                                                                                                                                                                                                                                                                                                                                                                                                                                                                              |
| Article Type:                   | Original research                                                                                                                                                                                                                                                                                                                                                                                                                                                                                                                                                                                                                                                                                                                                                   |
| Date Submitted by the Author:   | 27-Sep-2021                                                                                                                                                                                                                                                                                                                                                                                                                                                                                                                                                                                                                                                                                                                                                         |
| Complete List of Authors:       | Bhatia, Dominika; University of Toronto, Institute of Health Policy, Management and Evaluation<br>Mishra, Sujata; University of Toronto, Institute of Health Policy, Management and Evaluation, Dalla Lana School of Public Health<br>Kirubarajan, Abirami; University of Toronto, Institute of Health Policy Management and Evaluation, Dalla Lana School of Public Health<br>Yanful, Bernice; University of Toronto, Public Health Sciences Division, Dalla Lana School of Public Health<br>Allin, Sara; University of Toronto, Institute of Health Policy Management and Evaluation, Dalla Lana School of Public Health<br>Di Ruggiero, Erica; University of Toronto, Public Health Sciences Division, Dalla Lana School of Public Health, University of Toronto |
| <b>Primary Subject Heading</b>: | Global health                                                                                                                                                                                                                                                                                                                                                                                                                                                                                                                                                                                                                                                                                                                                                       |
| Secondary Subject Heading:      | Health services research                                                                                                                                                                                                                                                                                                                                                                                                                                                                                                                                                                                                                                                                                                                                            |
| Keywords:                       | Health policy < HEALTH SERVICES ADMINISTRATION & MANAGEMENT, PUBLIC HEALTH, International health services < HEALTH SERVICES ADMINISTRATION & MANAGEMENT                                                                                                                                                                                                                                                                                                                                                                                                                                                                                                                                                                                                             |
|                                 |                                                                                                                                                                                                                                                                                                                                                                                                                                                                                                                                                                                                                                                                                                                                                                     |

SCHOLARONE™  
Manuscripts



I, the Submitting Author has the right to grant and does grant on behalf of all authors of the Work (as defined in the below author licence), an exclusive licence and/or a non-exclusive licence for contributions from authors who are: i) UK Crown employees; ii) where BMJ has agreed a CC-BY licence shall apply, and/or iii) in accordance with the terms applicable for US Federal Government officers or employees acting as part of their official duties; on a worldwide, perpetual, irrevocable, royalty-free basis to BMJ Publishing Group Ltd ("BMJ") its licensees and where the relevant Journal is co-owned by BMJ to the co-owners of the Journal, to publish the Work in this journal and any other BMJ products and to exploit all rights, as set out in our [licence](#).

The Submitting Author accepts and understands that any supply made under these terms is made by BMJ to the Submitting Author unless you are acting as an employee on behalf of your employer or a postgraduate student of an affiliated institution which is paying any applicable article publishing charge ("APC") for Open Access articles. Where the Submitting Author wishes to make the Work available on an Open Access basis (and intends to pay the relevant APC), the terms of reuse of such Open Access shall be governed by a Creative Commons licence – details of these licences and which [Creative Commons](#) licence will apply to this Work are set out in our licence referred to above.

Other than as permitted in any relevant BMJ Author's Self Archiving Policies, I confirm this Work has not been accepted for publication elsewhere, is not being considered for publication elsewhere and does not duplicate material already published. I confirm all authors consent to publication of this Work and authorise the granting of this licence.

1  
2  
3 **Identifying priorities for research on financial risk protection to achieve universal**  
4 **health coverage: A scoping overview of reviews**  
5  
6  
7

8 **Authors**  
9

10 Dominika Bhatia<sup>1</sup>† [dominika.bhatia@mail.utoronto.ca](mailto:dominika.bhatia@mail.utoronto.ca) ORCID: 0000-0002-9621-0672

11 Sujata Mishra<sup>1</sup> [sujata.mishra@mail.utoronto.ca](mailto:sujata.mishra@mail.utoronto.ca)

12 Abirami Kirubarajan<sup>1</sup> [abi.kirubarajan@gmail.com](mailto:abi.kirubarajan@gmail.com)

13 Bernice Yanful<sup>2</sup> [b.yanful@utoronto.ca](mailto:b.yanful@utoronto.ca)

14 Sara Allin<sup>1</sup> [sara.allin@utoronto.ca](mailto:sara.allin@utoronto.ca)

15 Erica Di Ruggiero<sup>2</sup> [e.diruggiero@utoronto.ca](mailto:e.diruggiero@utoronto.ca)  
16  
17  
18  
19  
20  
21  
22

23 **Author affiliations**

24 <sup>1</sup> Institute of Health Policy Management and Evaluation, Dalla Lana School of Public Health,  
25 University of Toronto, Toronto, Ontario, Canada

26 <sup>2</sup> Public Health Sciences Division, Dalla Lana School of Public Health, University of Toronto,  
27 Toronto, Ontario, Canada  
28  
29  
30  
31  
32

33 ‡ corresponding author  
34  
35  
36  
37

38 **Word count:** 5,812

39 **Tables and figures:** 5/5

40 **References:** 99/100  
41  
42  
43  
44  
45  
46  
47  
48  
49  
50  
51  
52  
53  
54  
55  
56  
57  
58  
59  
60



## ABSTRACT

**Objectives:** Financial risk protection (FRP) is an indicator of the Sustainable Development Goal 3 universal health coverage (UHC) target. We sought to characterize what is known about FRP in the UHC context and to identify evidence gaps to prioritize in future research.

**Design:** Scoping overview of reviews using the Arksey & O'Malley and Levac & Colquhoun framework and the PRISMA-ScR guidelines.

**Data sources:** MEDLINE, PsycINFO, CINAHL-Plus, and PAIS Index were searched for studies published between January 1, 1995 and July 20, 2021.

**Eligibility criteria:** Records were screened by two independent reviewers in duplicate using the following criteria: (i) literature review; (ii) focus on UHC achievement through FRP; (iii) English or French language; (iv) published after 1995; and (v) peer-reviewed.

**Data extraction and synthesis:** Two reviewers extracted data using a standard form and descriptive content analysis was performed to synthesize findings.

**Results:** 50 studies were included. Most studies were systematic reviews focusing on low- and middle-income countries. Study periods spanned 1990 and 2020. While FRP was recognized as a dimension of UHC, it was rarely defined as a concept. Out-of-pocket, catastrophic, and impoverishing health expenditures were most commonly used to measure FRP. Pooling arrangements, expansion of insurance coverage, and financial incentives were the main interventions for achieving FRP. Evidence gaps pertained to the effectiveness, cost-effectiveness, and equity implications of efforts aimed at increasing FRP. Methodological gaps related to trade-offs between single-country and multi-country analyses; lack of process evaluations; inadequate mixed-methods evidence, disaggregated by relevant characteristics; lack of comparable and standardized measurement; and short follow-up periods.

**Conclusions:** This scoping overview of reviews characterized what is known about FRP as a UHC dimension and found evidence gaps related to the effectiveness, cost-effectiveness, and equity implications of FRP interventions. Theory-informed mixed-methods research using high-quality, longitudinal, and disaggregated data is needed to address these objectives.

**Abstract word count:** 300/300

**Keywords:** evidence gaps, financial risk protection, overview, research priority setting, scoping review, umbrella review, universal health coverage

## STRENGTHS AND LIMITATIONS OF THIS STUDY

- This is the first scoping overview of reviews synthesizing the evidence gaps related to the conceptualization of financial risk protection, interventions aimed at increasing financial risk protection, and outcomes used to measure financial risk protection in the context of universal health coverage.
- This study was guided by a prospectively registered protocol, a rigorous search strategy, and systematic evidence review methods.
- Study searches were limited by language (English and French) and publication year (1995-2021); however, the study periods of the individual included reviews ranged from 1990 to 2020.
- In order to characterize the published evidence base, this research relied on academic peer-reviewed literature.
- As recommended in scoping review guidelines, we relied on the interpretations of the authors of the included reviews, rather than impose our own meanings.

## INTRODUCTION

At the 58<sup>th</sup> World Health Assembly in 2005, Member States committed to transitioning to universal coverage to guarantee access to necessary health services to the entire population, while protecting against financial risk (WHA58.33) (1). This objective was reaffirmed in the 2015 ratification of the United Nations 2030 Agenda for Sustainable Development, which outlined 17 Sustainable Development Goals (SDGs) and 169 targets that aim to provide “peace and prosperity for people and the planet” (2). Specifically, SDG 3 called on Member States to ensure healthy lives and promote wellbeing for all at all ages through the “achieve[ment] of universal health coverage (UHC), including financial risk protection (FRP), access to quality essential health-care services and access to safe, effective, quality and affordable essential medicines and vaccines for all” (target 3.8) (2). The countries’ progress towards the UHC target through FRP is monitored using indicators 3.8.1 (coverage of essential health services among the general and most disadvantaged populations) and 3.8.2 (proportion of population with large household expenditures on health as a share of total household expenditure or income) (2).

The World Health Organization (WHO) Thirteenth General Programme of Work (GPW13), which provides a framework for measuring progress towards the health-related SDG targets, specified a goal of one billion more people benefitting from UHC by the year 2023 (3). However, despite notable progress towards UHC over the past 30 years, nearly 90 million people are pushed into extreme poverty due to healthcare expenditures each year (4), and only an estimated 389 million additional people will benefit from UHC by 2023, significantly undershooting the GPW13 target (5). While nearly all countries impose direct user payments for health services, this form of healthcare financing is especially predominant in low- and middle-income countries (LMIC) (6,7), and is more prohibitive to populations rendered socially and economically marginalized by systemic barriers in both LMIC and high-income countries (HIC) (6). Indirect payments related to transportation and lost wages further increase the risk of financial catastrophe and exacerbate inequities (6).

1  
2  
3 Bibliometric analyses suggest that the release of SDGs has stimulated considerable  
4 scholarly research on UHC, with nearly half of the studies published after 2015 (8).  
5  
6 Nonetheless, substantial debate remains on the conceptualization of FRP as a dimension of  
7 UHC, the established metrics for measuring FRP and its absence, and mechanisms for  
8 achieving UHC through FRP (9–12). These ambiguities complicate the decision-makers'  
9 ability to translate UHC from an aspirational objective into practical public policy (11).  
10  
11 Identifying research priorities through evidence synthesis is an important function of  
12 health policy and systems research that ensures alignment between evidence needs,  
13 research funding, and research efforts (13–16). While some recent studies have outlined  
14 priority research gaps related to SDGs implementation (17,18), no studies have focused on  
15 research priorities related to the achievement of UHC through FRP. In this study, we  
16 performed a scoping overview of reviews (i) to synthesize the existing knowledge on FRP  
17 in the UHC context and (ii) to identify evidence gaps to prioritize in future research.  
18  
19  
20  
21  
22  
23  
24  
25  
26  
27  
28

## 29 **METHODS**

### 30 **Study design and rationale**

31  
32  
33 Since there is no single accepted methodology for identifying evidence gaps (15), our  
34 approach requires some justification. Overviews of literature reviews (“overviews”), where  
35 secondary studies are the unit of analysis, have been described as the preferred review  
36 methodology when the evidence base is vast and when policy- or decision-makers are the  
37 intended knowledge users (19–21). As identifying inconsistent or insufficient evidence is  
38 already implicit in syntheses of primary studies (15,22), overviews are able to summarize  
39 this information as evidence gaps that are generalizable and applicable in future research  
40 (19–21). Although standardized recommendations for the conduct of overviews are not  
41 available, existing review methodologies for primary studies can be adapted (20,21,23).  
42 Scoping reviews are better suited to exploratory and descriptive objectives, such as  
43 mapping of the evidence and identification of key concepts, while systematic reviews have  
44 more narrow objectives that are explanatory or analytical in nature (24). Consequently,  
45  
46  
47  
48  
49  
50  
51  
52  
53  
54  
55  
56  
57  
58  
59  
60

1  
2  
3 scoping overviews of the academic literature have been frequently used for global health  
4 services and systems research agenda-setting (14,17,18,25).  
5  
6  
7

8 In conducting this scoping overview, we used the five-step scoping review methodological  
9 framework by Arksey & O'Malley and Levac & Colquhoun (26–28). We adhered to the  
10 Preferred Reporting Items for Systematic Reviews and Meta-Analyses Extension for  
11 Scoping Reviews (PRISMA-ScR) reporting guidelines (24,29) and were guided by a  
12 research protocol published prospectively on Open Science Framework (30).  
13  
14  
15  
16  
17  
18

### 19 **Information sources and search strategy**

20 The search strategy (see **Supplementary file 1**) was developed in consultation with a  
21 public health information specialist. We searched MEDLINE (Ovid), APA PsycINFO (Ovid),  
22 CINAHL-Plus (EBSCO), and PAIS Index (ProQuest) for English and French-language sources  
23 published between January 1, 1995 and July 20, 2021. This date cut-off was chosen because  
24 >97% of the literature on UHC was published after 1995 (8), likely due to the adoption of  
25 the Millennium Development Goals (MDGs) in 2000, in which MDGs 1 and 4-7 expressed a  
26 need for universal access to treatment for select health issues (31). We used pre-tested  
27 search filters to identify review articles (32). The search terms included controlled  
28 vocabulary and keywords for the concepts of (i) UHC, (ii) FRP, and (iii) equity or  
29 impoverishment (33). We used a broad set of synonyms for each concept, as, for example,  
30 UHC-related terms have evolved over time and usage has varied between HIC (“universal  
31 health care”) and LMIC (“universal health coverage”) (10,12). To capture possible variation  
32 in FRP definitions, search concepts were combined using the following logic: (UHC AND  
33 FRP) OR (UHC AND equity). The bibliographic searches were supplemented by a review of  
34 forward, backward, and co-citations (34).  
35  
36  
37  
38  
39  
40  
41  
42  
43  
44  
45  
46  
47  
48

### 49 **Study selection process**

50 Search strategies were imported into a web-based systematic review management  
51 software, Covidence ([www.covidence.org](http://www.covidence.org)), to remove duplicate citations and perform  
52 citation screening against the predefined selection criteria (described in detail in  
53 **Supplementary file 2**). Studies were eligible if they (i) employed a literature review  
54  
55  
56  
57

1  
2  
3 methodology (where an explicit methodology section was provided to confirm that a  
4 literature review was undertaken); (ii) focused on the achievement of UHC through FRP;  
5 (iii) were written in English or French; (iv) were published after 1995; (v) were an original  
6 peer-reviewed published work; and (vi) could be retrieved through the University of  
7 Toronto library. The selection criteria were first piloted on a sample of 100 citations by two  
8 independent researchers (DB, SM). Citations were then screened in full by the two  
9 independent researchers in two phases: (i) titles and abstracts and (ii) full-text articles. The  
10 average Cohen's kappa was calculated to be 0.5, reflecting fair inter-rater agreement (35).  
11 Conflicting votes at both screening phases were resolved through discussion with the  
12 research team.  
13  
14  
15  
16  
17  
18  
19  
20  
21

### **Data extraction and synthesis**

22  
23  
24 The data were extracted verbatim from the included articles. A data charting template was  
25 first piloted by two independent reviewers (DB, SM) on a random selection of 15 articles  
26 and discrepancies were discussed with the other co-authors. Data extraction on the  
27 remaining set of articles was divided between the two reviewers. Data items included  
28 publication information; study methodology; study objectives; descriptive characteristics;  
29 definitions of FRP (concepts, measurements, and interventions); and evidence gaps. By  
30 "FRP interventions", we broadly mean the implementation of policies, programs, and  
31 mechanisms aimed at reducing health-related financial burden among health system users.  
32 Evidence gaps were defined as research findings or propositions identified as insufficient  
33 and meriting further study by the research community (i.e., authors of the included  
34 studies) (15). Evidence gaps were retrieved from the results, discussion, and limitation  
35 sections of the included articles.  
36  
37  
38  
39  
40  
41  
42  
43  
44  
45

46  
47 To address the first objective, we summarized what is currently known in the literature  
48 about FRP, including its conceptualization, measurement, and implementation as an  
49 intervention. To address the second objective, we performed a descriptive content analysis  
50 of the extracted data to describe and summarize the evidence gaps identified by the  
51 research community, classified as gaps related to the evidence base and to methodology.  
52  
53  
54  
55  
56  
57  
58  
59  
60

1  
2  
3 Similar to the approach taken by other studies on research priority-setting in global health  
4 (17,18,25), this information was framed more broadly to enable applicability to multiple  
5 contexts and research topics. Descriptive approaches to content analysis involve staying  
6 close to the data; consequently, this synthesis is more summative than interpretive,  
7 compared to other meta-aggregative approaches (e.g., grounded theory or meta-  
8 ethnography) (36,37). Descriptive synthesis is recommended for scoping reviews, as  
9 scoping reviews seek to describe the state of the literature (24).  
10  
11  
12  
13  
14  
15  
16

### 17 **Patient and public involvement**

18 No patients or members of the public were involved in this study.  
19  
20  
21  
22  
23

## 24 **RESULTS**

25  
26  
27 Following the review of 2,902 records and handsearching, 50 peer-reviewed articles were  
28 included (**Figure 1**), with their characteristics presented in **Tables 1** and **2**. Publication  
29 years ranged from 2010 to 2021, with most papers (n = 39, 78%) published between 2015  
30 and 2021 and study periods covering 1990 and 2020. Most study designs were systematic  
31 reviews (n = 34, 68%), followed by narrative reviews (n = 4, 8%), and review-based  
32 comparative analyses (n = 4, 8%). Among the geographical regions covered by the included  
33 reviews, 62% considered countries in the African region, 56% in the South-East Asian  
34 region, 54% Western-Pacific region, 44% in the Pan-American region, 24% in the European  
35 region, and 8% in the Eastern-Mediterranean region. Over half the studies (n = 27, 54%)  
36 included two or more world regions. Nearly three-quarters (n = 36, 71%) of the reviews  
37 focused on LMIC, one review (2%) focused on HIC, and 12 (24%) considered both LMIC  
38 and HIC. Fifteen studies (30%) focused on FRP in specific populations, including women  
39 and children, low-income groups, individuals with multimorbidity, those with mental  
40 health issues, and surgical, cancer, and tuberculosis patients.  
41  
42  
43  
44  
45  
46  
47  
48  
49  
50  
51  
52  
53

### 54 **What is known in the literature about financial risk protection?**

55  
56  
57  
58  
59  
60

1  
2  
3 **Financial risk protection as a concept.** Twenty-six (52%) studies defined FRP as a  
4 concept (38–62), with 23 (46%) studies specifically referring to FRP as a necessary step to  
5 achieving UHC (38–52,54–57,59–63). Some studies suggested that FRP is achieved when  
6 households are able to use safe, effective, and high-quality health services, without  
7 sacrificing other necessities for wellbeing, such as nutrition (38–40,51,55,57,59,60). Others  
8 considered FRP more narrowly as a means of reducing illness-related expenditures (41–  
9 43,54,58,64–67). This includes “financial toxicity”, which describes the distress and  
10 financial hardship experienced by patients and their caregivers following a cancer  
11 diagnosis (54,58). Studies further suggested that a lack of FRP may exacerbate health and  
12 socioeconomic inequalities by reducing access to health services and discouraging or  
13 delaying care-seeking (19,40,53,56,62).  
14  
15  
16  
17  
18  
19  
20  
21  
22  
23

24 **Financial risk protection as a measure.** Thirty-nine studies (78%) used one or more of  
25 the following FRP measures: (i) out-of-pocket expenditures (OOPE) (n = 28, 56%); (ii)  
26 catastrophic health expenditures (CHE) (n = 25, 50%); and (iii) impoverishing health  
27 expenditures (IHE) (n = 11, 22%), with 20 (40%) studies mentioning at least two  
28 measures, and nine (18%) considering all three. These measures may be calculated for all  
29 health-related expenditures or specific categories of services, such as chronic disease,  
30 infectious disease, or maternal health (47,54,58,61). As CHE and IHE are measured against  
31 thresholds, some studies may also calculate the mean positive overshoot of the threshold to  
32 quantify the intensity of financial hardship (47,51,68).  
33  
34  
35  
36  
37  
38  
39  
40  
41

42 *Out-of-pocket expenditures.* OOPE include payments, not reimbursed by insurance, made by  
43 individuals or households to meet health-related needs (40,45,52,59,62,64,69). Direct  
44 payments include health service costs and indirect payments may include transportation  
45 costs and losses in productivity or income when accessing health services  
46 (40,45,54,58,61,64,69). OOPE indicators may be measured as changes in spending due to  
47 illness (52,59,61,70); as the proportion of annual wages or disposable income (46); or as a  
48 proportion of the ability to pay, defined as basic need expenditures (with food often used as  
49 a proxy for basic needs) (40,47,61,71). OOPE may reflect a low degree of FRP because even  
50 small OOPE can cause financial hardship for poor households (40,62,72).  
51  
52  
53  
54  
55  
56  
57  
58  
59  
60



1  
2  
3  
4  
5 *Catastrophic health expenditures.* CHE was defined as excess spending on health that may  
6 cause financial catastrophe, measured as health-related OOPe in the numerator and total  
7 income or consumption (budget share method) or spending on basic needs (ability to pay  
8 method) in the denominator (40,47,51,55,64,70,71). Thresholds of 10-25% are used for the  
9 budget share method (10% of total household expenditures or 20-25% of total household  
10 income) (40,51,55,61,64), and 25-40% for the ability to pay method  
11 (40,55,59,61,64,68,71,73). Some studies use the normative food spending approach to  
12 define ability to pay, where a household's food-related expenditures are subtracted from  
13 total consumption and the remaining amount is used in the denominator to calculate CHE  
14 (40,51,55,59,64,71). An advantage of CHE indicators is that they can be calculated for all  
15 income groups; however, these indicators do not capture descent into poverty owed to  
16 healthcare expenditures (51).  
17  
18  
19  
20  
21  
22  
23  
24  
25  
26  
27

28 *Impoverishing health expenditures.* To understand whether health needs push households  
29 into poverty, health-related OOPe may be measured against predefined poverty lines  
30 (40,47,51,52,66,68,70). Poverty lines represent the level at which the basic needs of life  
31 cannot be met (51). Absolute poverty lines may be used, such as the World Bank  
32 international poverty line (currently, \$1.90 per person per day) (40,68) or national poverty  
33 lines based on the World Bank poverty assessment, food poverty (cost of minimum food  
34 requirements), or basic needs (cost of the basket of goods considered to satisfy basic  
35 biological needs) (40). Relative thresholds may also be considered, calculated as household  
36 income over the national mean or median income (40).  
37  
38  
39  
40  
41  
42  
43  
44

45 **Financial risk protection as an intervention.** Among the included studies, the following  
46 interventions were employed to increase FRP in the population: (i) pooling arrangements  
47 (n = 18, 36%); (ii) expanding insurance coverage (including either the benefit package or  
48 the proportion of the population or costs covered) (n = 23, 46%); and (iii) implementing  
49 financial incentives (n = 9, 18%).  
50  
51  
52  
53  
54  
55  
56  
57  
58  
59  
60

1  
2  
3 *Pooling arrangements.* Risk pooling involves de-linking health-related financial  
4 contributions from health risk, enabling lower-need (and by extension, healthier and/or  
5 wealthier) individuals to subsidize higher-need (and by extension, sicker and/or poorer)  
6 individuals (38,43,45,56,59,60,74–77). Consequently, health-related financial risk is spread  
7 to a pool of individuals, rather than being borne by a single person experiencing ill health  
8 (74,76,77). The design of pooling arrangements, including the source of funds and extent of  
9 government subsidization; whether contributions are compulsory or voluntary; and the  
10 size, number, and competitiveness of pools; affects the extent to which risk pooling is  
11 achieved (38,43,53,56,59,72,74,76,77). The pooling arrangements examined by the  
12 included studies comprised national or social health insurance (SHI; compulsory schemes  
13 operated by the state, which are publicly financed through taxation or social security  
14 schemes) (38,50,52,57,62,72,75–79); community-based health insurance (CBHI; voluntary  
15 schemes operated by non-profit and non-governmental insurers, in which insurers apply  
16 community-rated premiums) (38,42,49,53,56,57,78,80); and private health insurance (PHI;  
17 voluntary schemes operated by private for-profit insurers with little to no state  
18 involvement, in which insurers apply risk-related premiums) (38,50,57,59,72,73,78). PHI  
19 schemes can be further classified as complementary (covering residual OoPE, such as co-  
20 payments, or additional health services, excluded from the state benefit package),  
21 supplementary (providing enhanced provider choice and access), or substitutional  
22 (providing coverage to those unable to receive state benefits) (59,72–74).

23  
24  
25  
26  
27  
28  
29  
30  
31  
32  
33  
34  
35  
36  
37  
38  
39  
40 *Expanding insurance coverage.* Several studies examined the effects of expanding the  
41 benefit package (i.e., the health services covered by insurance schemes) and extending  
42 insurance coverage to a greater proportion of the population or healthcare costs  
43 (51,52,60,62–65,67–69,73,80–83). Limited health service coverage may result in greater  
44 OoPE, thereby reducing FRP (52,64,67,68,83). Populations experiencing socioeconomic  
45 marginalization may also be more vulnerable to increased OoPEs due to barriers to  
46 insurance enrollment, such as premiums (41,73,81,84). While previously, many health  
47 benefits packages tended to prioritize coverage for low-probability, high-cost inpatient  
48 services, there has been increasing recognition that outpatient chronic disease prevention  
49 and management, including prescription drugs, drive health-related OoPE (46,51,52).

1  
2  
3  
4  
5 *Financial incentives.* Financial incentives, including general and conditional cash transfers,  
6 vouchers, removal of user fees, and other subsidies, seek to reduce financial barriers to  
7 specific health services and facilitate utilization, adherence to short-term and long-term  
8 treatments, and health-promotive behaviours among health system users and targeted  
9 populations experiencing marginalization (19,38,39,52,62,65,83,85,86).

### 15 **Which evidence gaps remain in the literature on financial risk protection?**

18  
19 Studies identified evidence gaps related to the effectiveness of FRP interventions, their  
20 equity implications, and their cost-effectiveness. The identified research evidence gaps are  
21 summarized in **Table 3**.

24  
25  
26 **Evidence of effectiveness.** Studies (n = 25, 50%) recognized that implementation of FRP  
27 programs should be informed by evidence of their effectiveness in relation to health service  
28 use, FRP, patient experiences, and health status.

31  
32  
33 *Impact on health service utilization.* Expansion of health insurance through SHI and CBHI  
34 had mixed effects on general health service use (38,52,70,76,78). Among reviews that  
35 considered the types of health services, SHI and CBHI were associated with increases in the  
36 use of antenatal (53,65,76,79) and outpatient (including curative, disease management,  
37 and preventive care) (53,70,75,76,78,79) services, as well as increases in (78) or no  
38 association with inpatient service use (53). The included reviews further noted that few  
39 studies examined the effects of PHI on health service use (38,78). In the United States (US)  
40 and China, PHI was associated with increased use of preventive care (59,73), but was not  
41 associated with the use of inpatient or outpatient care (73). Other reviews found that  
42 financial incentives may improve adherence to long-term but not short-term treatments  
43 (38,76). As countries are expanding coverage to outpatient chronic disease and mental  
44 health care and pharmaceuticals, several reviews noted that future studies should  
45 investigate whether this yields increased access and utilization of these services (38,48,51–  
46  
47  
48  
49  
50  
51  
52  
53  
54  
55  
56  
57  
58  
59  
60

1  
2  
3 53). It also remains unclear what proportion of the observed increases in utilization  
4 represent health service overuse, particularly for high-cost invasive procedures (19,65,76).  
5  
6  
7

8 *Impact on financial risk protection.* The impact of FRP interventions on measures of FRP,  
9 including OOPE, CHE, and IHE, has been characterized as inconsistent (44,51,70,75,76).  
10 SHI, CBHI, and financial incentives have been associated with reductions in OOPE in some  
11 reviews (44,70,75,78,79,83) and no significant effect in others (44,70,76). Studies have  
12 provided the following suggestions for future research to clarify impacts: (i) investigating  
13 the specific health services that drive high OOPE (40,51,61); (ii) the role of chronic illness  
14 and multimorbidity in driving high OOPE (46,47,54); (iii) the role of non-medical services,  
15 such as transportation and food, in exacerbating health-related OOPE (47,54,61,64); and  
16 (iv) whether the cost of premiums or entry fees into insurance schemes (which are  
17 presently not included in health-related OOPE calculations) affect FRP (76).  
18  
19  
20  
21  
22  
23  
24  
25  
26  
27

28 *Impact on experience of care.* Reviews suggested the need to monitor patient experiences  
29 and perceptions of care, as these outcomes are relevant to care-seeking but are not  
30 typically considered among FRP intervention impact evaluations (63,64,86). In one review  
31 that reported on this outcome, enrolment in SHI was associated with the perception that  
32 care is more affordable, compared to uninsured individuals (79).  
33  
34  
35  
36  
37

38 *Impact on health status.* Several reviews noted that population health outcomes, including  
39 morbidity, mortality, disability, or health utility measures (quality-adjusted life years,  
40 QALY, or disability-adjusted life years, DALY) should be considered in FRP impact  
41 evaluations (38,65,70,75,85,86). Among reviews that evaluated health outcomes, FRP  
42 interventions were associated with improvements in tuberculosis treatment rates and  
43 perinatal maternal and infant outcomes in some reviews (79,83) and were not significantly  
44 associated with perinatal infant outcomes and general health status in others  
45 (38,76,78,79). Health outcomes may also be tailored to target populations and health  
46 system contexts. For example, the impact of maternal and neonatal FRP interventions may  
47 be measured by stratifying maternal and neonatal health status by home- and facility-based  
48 deliveries, as FRP interventions may lead to more facility-based deliveries (65,85).  
49  
50  
51  
52  
53  
54  
55  
56  
57

1  
2  
3  
4  
5 **Equity considerations.** Studies noted that evaluations of effectiveness should assess  
6 whether FRP intervention impacts are equitable (n = 15, 30%). Specifically, studies  
7 recommended stratifying (i) FRP intervention coverage and (ii) FRP indicators and other  
8 outcomes across subgroups experiencing marginalization. Poverty, chronic illness, and  
9 older age were observed to be the most frequent strata reported by primary studies  
10 (40,41,43,46,48,51), possibly because these subgroups are more readily identifiable in the  
11 data (41). Several reviews have suggested considering additional subgroups, including area  
12 of residence, age, gender, citizenship/migration status, ethnicity, employment status,  
13 homelessness, and institutionalization (40,41,43,46,48,51); however, these facets of  
14 marginalization remain more challenging to operationalize due to variation in political and  
15 cultural contexts (41).  
16  
17  
18  
19  
20  
21  
22  
23  
24  
25

26 *Stratification of FRP intervention coverage.* Reviews suggested monitoring new enrollees in  
27 FRP interventions and estimating what proportion of the population covered was part of a  
28 marginalized group, as overall enrollment estimates may mask inequalities in coverage  
29 among marginalized populations (52,53,76,78,86). For instance, fewer PHI selling agencies,  
30 lower availability of PHI information, and poor access to healthcare providers in rural and  
31 low-income areas may underlie inequalities in PHI enrollment (53). Others have suggested  
32 that while affordable premiums may support CBHI enrollment among poorer segments of  
33 the population, higher co-payments may discourage care seeking, resulting in poorer  
34 households subsidizing wealthier enrollees (53). Disparities in coverage may further  
35 exacerbate inequities in downstream outcomes (e.g., OOPE or health status) (52,76,78,86).  
36  
37  
38  
39  
40  
41  
42  
43  
44

45 *Stratification of FRP intervention impacts.* The included reviews observed a need to collect  
46 and analyze disaggregated OOPE, CHE, or IHE data to investigate whether FRP  
47 interventions reduce inequities in health-related expenditures among subgroups  
48 experiencing marginalization, compared to the general population (38–40,48,51,53,82).  
49 Interestingly, among reviews that identified studies with disaggregated data, high  
50 expenditures persisted among individuals with chronic illnesses, older adults, and  
51 individuals with disabilities (41,47).  
52  
53  
54  
55  
56  
57

1  
2  
3  
4  
5 As it is hypothesized that removing financial barriers to healthcare would improve  
6 population health, reviews highlighted a need to also disaggregate intervention impacts  
7 across other outcomes, including health service utilization and health status (48,76,78,82).  
8  
9 Among reviews that identified studies that disaggregated health service utilization, CBHI  
10 has been associated with more equitable need-based healthcare use across income  
11 quartiles, compared to those uninsured (53,78). SHI has been associated with greater  
12 health service use among low-income groups, though differences remained in the use  
13 public versus private healthcare facilities (57,78). PHI has shown mixed effects on cancer  
14 screening uptake in the US across racial subgroups (59), while in China, PHI has been  
15 associated with greater healthcare utilization only among urban residents (73).  
16  
17  
18  
19  
20  
21  
22  
23

24 **Evidence of cost-effectiveness.** In addition to demonstrating effectiveness, studies (n = 9,  
25 18%) noted that cost-effectiveness should be considered, given its relevance to decision-  
26 makers. This involves gaining a comprehensive understanding of program resource  
27 requirements, resource management, and comparative cost-effectiveness.  
28  
29  
30  
31  
32

33 *Estimating resource requirements and input costs.* Studies highlighted the need to estimate  
34 start-up (19,64), operating (19,85), and scale-up (75,85) costs of FRP interventions to  
35 ensure adequate coverage of the target population and inform intervention sustainability.  
36 This includes standardizing program costing approaches to enable robust comparisons  
37 (64,85).  
38  
39  
40  
41  
42

43 *Mobilizing and managing resources.* Other key evidence gaps related to articulating clear  
44 approaches to mobilizing resources to meet the needs of FRP programs; determining  
45 optimal program financing models, including the roles of governments and other payers;  
46 and understanding how to best manage resources once programs are funded (43,75,78).  
47  
48  
49  
50  
51

52 *Establishing comparative cost-effectiveness.* Cost-effectiveness includes a broad class of  
53 analyses that seek to estimate the benefit of programs, such as improvements in health  
54 status or changes in health service use, relative to their resource inputs (39,57,85,86). In  
55  
56  
57  
58  
59  
60

1  
2  
3 addition to estimating the cost-effectiveness of individual FRP programs, researchers  
4 should consider how cost-effective programs are relative to alternative programs seeking  
5 to achieve the same impacts (19,75,85).  
6  
7  
8  
9

### 10 **Which methodological gaps remain in the literature on financial risk protection?**

11  
12  
13 A number of methodological issues should be considered when designing studies to  
14 address the identified evidence gaps. A concept map outlining the evidence gaps and  
15 methodological considerations is presented in **Figure 2**.  
16  
17  
18  
19

20  
21 **Country focus.** Researchers should consider the trade-offs of performing single-country  
22 versus multi-country analyses. While multi-country studies provide a snapshot of a large  
23 body of evidence, these analyses tend to lack depth in terms of time-trends and contextual  
24 features within and outside of the healthcare system (40,41). In addition, countries may be  
25 unequally represented in multi-country reviews, leading to biased conclusions  
26 (40,42,56,75,78,84). On the other hand, although findings from single-country case studies  
27 may not be generalizable to other settings (40,57,63,68,71), they may provide more  
28 detailed contextual information (40,52,78). Multi-jurisdictional case-studies and health  
29 system comparative research may provide an opportunity to capitalize on the strengths of  
30 both approaches (40,60,72).  
31  
32  
33  
34  
35  
36  
37  
38  
39

40 **Process evaluations.** Despite the widespread political commitment to UHC through FRP,  
41 studies noted that implementation of these aims has been suboptimal and there is a lack of  
42 understanding of how contextual factors, including the political environment, social  
43 welfare policies, culture, population size and characteristics, historical investment in the  
44 healthcare system, economic growth, and the number of payers (e.g., government, private,  
45 and users), may facilitate or hinder financing, implementing, operating, and scaling up of  
46 FRP interventions (40,41,52,53,66,75,78). More research is also needed to elucidate how  
47 implementation of new FRP interventions, such as CBHI or incentive-based programs,  
48 could complement the existing health financing arrangements to progress towards UHC  
49 (42,73). In addition to implementation issues, studies highlighted the current limited  
50  
51  
52  
53  
54  
55  
56  
57  
58  
59  
60

1  
2  
3 understanding of the reasons why FRP interventions do not achieve their intended impacts  
4 after implementation (53,70). This is especially relevant when considering the failures of  
5 some FRP interventions to reduce inequities in coverage; incurred OOPE, CHE, and IHE;  
6 and poor health outcomes among marginalized segments of the population (45,50,67).  
7  
8  
9

10  
11  
12 Process evaluation could address explanatory research questions related to how contexts  
13 affect the implementation and success of FRP interventions (44,53,60,62). Realist  
14 evaluation methods may be particularly well-suited to addressing such aims, as realist  
15 evaluation seeks to identify context-mechanism-outcome configurations that describe what  
16 works, for whom and in which circumstances (41,62). Finally, two reviews noted that it is  
17 unclear whether FRP programs and their evaluations are informed by specific conceptual  
18 frameworks or theories of change (39,82). Consensus should also be reached regarding the  
19 relevant process indicators to enable process evaluation comparability (44).  
20  
21  
22  
23  
24  
25  
26  
27

28 **Qualitative data.** Reviews acknowledged the limited availability of qualitative evidence,  
29 including key stakeholder perspectives (41,44,60,70). Qualitative data can support process  
30 and realist evaluations by illuminating how implementation issues, contexts, and  
31 mechanisms of change may influence the intervention-outcome associations observed in  
32 the quantitative data, including inequitable impacts (41,60,70,75). Hunter and Murray  
33 (2017) also cautioned that many studies with qualitative components tend to be situated  
34 within large mixed-methods evaluations, in which more attention is devoted to reporting  
35 the quantitative findings (19). Future qualitative and mixed methods studies should thus  
36 provide more thorough descriptions of and rationale for the chosen data collection and  
37 analytic methods, as well as reflections on the role of the researcher in generating results  
38 (19).  
39  
40  
41  
42  
43  
44  
45  
46  
47  
48

49 **Quantitative data.** Poorly controlled observational study designs – particularly, self-  
50 reported cross-sectional household surveys – are abundant in the evidence base  
51 (19,39,41,46,49–51,53,54,64,65,70,76,78,84,85). This limits the ability to make causal  
52 inferences about FRP interventions and leaves the possibility of residual confounding  
53 related to population and health system factors (19,42,64,85). While the use of  
54  
55  
56  
57



1  
2  
3 randomized-controlled trials may clarify intervention impacts (59,65,70), using such study  
4 designs to evaluate government reforms or SHI schemes may not be feasible or ethical,  
5 compared to evaluating CBHI or incentive-based interventions (39,70). Future studies may  
6 consider alternative designs, such as well-controlled quasi-experimental studies, to  
7 evaluate programs (58,59,62,76,84). Further, since countries may employ multiple  
8 complex interventions to implement FRP, studies may need to evaluate combinations of  
9 interventions over individual programs (73,84).

10  
11  
12  
13  
14  
15  
16  
17 **Indicator measurement.** Reviews note that many studies focus on the incidence of OOPE  
18 or CHE, but few consider IHE (40,47). The number of households estimated to be  
19 experiencing CHE or IHE is also contingent on the choice of thresholds, which has  
20 implications for analyses of equity impacts (40,47,51,52). For instance, IHE measures are  
21 affected by poverty lines, and while international poverty lines may be more suitable for  
22 comparative studies, they may result in less sensitive indicators for HIC and some middle-  
23 income countries (40,47). Using national poverty lines may overcome this issue, but hinder  
24 international comparisons (40). In regard to CHE, studies have shown that the budget  
25 share method tends to find that health-related financial hardship is concentrated among  
26 more wealthy households (40). As such, ability to pay approaches for estimating CHE have  
27 been recommended, particularly when considering equity in the analysis (40). One review  
28 recommended that costs should be consistently converted to US dollars to improve  
29 comparability (61). Two reviews also noted a lack of validated disease-specific measures of  
30 financial risk, such as cancer-related financial toxicity, which limits comparability (54,58).

31  
32  
33  
34  
35  
36  
37  
38  
39  
40  
41  
42  
43  
44 **Data aggregation.** Meta-analyses could not be performed in many quantitative reviews  
45 (41,56,64,65,70,71,73,82,83). Robust inferences also could not be drawn due to different  
46 data sources (47,64), different data scope (e.g., national vs. targeted population surveys)  
47 (47), different recall periods (64), unclear documentation of data collection processes  
48 (40,51,64), and lack of standardization in data collection and outcome measures across  
49 survey cycles and countries (40,51,56). In some countries, the wait period to receive  
50 insurance coverage for new enrollees or migrants may also result in misclassification bias,  
51 as these groups would be considered uninsured and may incur higher healthcare costs

1  
2  
3 (64). Finally, it is unclear how the data collected for purposes other than FRP assessment,  
4 such as administrative data, may affect estimates of incurred costs (47).  
5  
6  
7

8 **Follow-up duration.** Most quantitative studies were conducted early in FRP intervention  
9 implementation, particularly those evaluating program pilots (19,40,47,50,66,85). This  
10 may, in part, explain the aforementioned evidence gaps related to impact evaluations on  
11 health status and equity, as well as the lack of clarity regarding long-term trends in FRP  
12 indicators, such as OOPE, CHE, or IHE (47,66,85). Future studies should consider using  
13 longitudinal and panel data to provide sufficient variation to analyze FRP intervention  
14 impacts over time (40,47,50,51,53,53,54,66).  
15  
16  
17  
18  
19  
20  
21  
22  
23

## 24 **DISCUSSION**

25  
26  
27 In this scoping overview of 50 academic literature reviews, we described the current state  
28 of knowledge on FRP in the UHC context and evidence gaps that should be prioritized in  
29 future research. We found that although FRP is recognized as a necessary dimension for  
30 achieving UHC, it remains unclear whether interventions increase FRP and optimize health  
31 service utilization, experience of care, and health status. The lack of disaggregated  
32 information across measures of social marginalization may further explain the limited  
33 understanding regarding how to equitably increase FRP among subgroups at greatest risk  
34 of poor health and its financial consequences. Finally, there is little evidence regarding the  
35 resources required to implement and sustain FRP interventions and regarding their cost-  
36 effectiveness. These evidence gaps are further compounded by methodological challenges.  
37  
38  
39  
40  
41  
42  
43  
44  
45  
46

### 47 **Interpretation and future directions**

48  
49 Previous work has suggested that the theory of change for SDG 3 has some limitations, as  
50 not all input, process, and impact indicators clearly align (87). This included an omission of  
51 impact indicators for FRP (where impacts are defined as long-term changes occurring in  
52 communities or systems as a result of FRP) (87), which may explain the limited evidence of  
53 effectiveness of FRP interventions in relation to service utilization, experience of care, and  
54  
55  
56  
57  
58  
59  
60

1  
2  
3 health status, in addition to financial risk. Reliance on cross-sectional self-reported  
4 household surveys in LMIC may partially underpin methodological issues, such as the lack  
5 of longitudinal follow-up and poor inter-jurisdictional comparability, and contribute to the  
6 inconclusiveness of existing effectiveness evaluations (9,88–90). Furthermore, the problem  
7 of unmeasured confounding persists even among well-designed observational studies,  
8 limiting causal interpretations (91). The growing use of routine health information systems  
9 (RHIS) for research in LMIC may present an opportunity to conduct higher-quality FRP  
10 intervention evaluations (51,92). For instance, RHIS data has been successfully used to  
11 support longitudinal program impact evaluations in relation to health service use and  
12 disease-related outcomes using time series and difference-in-difference designs (though it  
13 should be noted that RHIS do not provide information on FRP metrics like household OOPE,  
14 CHE, and IHE) (92). In addition, ambiguities in the quantitative evidence of effectiveness of  
15 FRP interventions may be owed to the inherent complexities of implementing and  
16 evaluating public health interventions within dynamic settings (93), rather than a limited  
17 evidence base. As such, our findings suggest that process evaluations using qualitative and  
18 mixed methods should accompany impact evaluations to elucidate FRP mechanisms of  
19 action across different health system contexts and population subgroups (94).  
20  
21  
22  
23  
24  
25  
26  
27  
28  
29  
30  
31  
32  
33  
34

35 Inconsistencies in concept definitions may underlie methodological issues. While there is  
36 general agreement on the importance of UHC, interpretations of the concepts of  
37 universality, health, and coverage vary in breadth, affecting the scope of FRP interventions  
38 and the choice of indicators used to monitor progress (10,11,95). The common indicators  
39 of FRP – OOPE, CHE, and IHE – may also not sufficiently capture the FRP concept, as these  
40 measures rely on healthcare utilization and do not account for individuals deterred from  
41 care-seeking by financial barriers, those opting for lower-quality health services, and those  
42 resorting to borrowing or selling assets to afford health services (9,52,61,96). In addition,  
43 while equity has often been thought to be implicit in the goal of UHC and an assumed  
44 consequence of its achievement (11,97,98), there is increasing recognition that striving for  
45 health for all and reducing disparities are two separate aims, warranting the need to  
46 explicitly measure and monitor equity in UHC interventions using disaggregated data (97).  
47 Although there is no agreement on which stratifying variables should be selected when  
48  
49  
50  
51  
52  
53  
54  
55  
56  
57

1  
2  
3 measuring inequities (97), the reviews included in this overview highlighted a need to  
4 disaggregate data across several social determinants of health (e.g., area of residence and  
5 migration status), in addition to income status.  
6  
7  
8  
9

### 10 **Strengths and limitations**

11 We conducted the first scoping study to identify research needs in the FRP knowledge base.  
12 A strength of our study is our use of rigorous systematic searching and evidence review  
13 methods. Several limitations should also be considered. First, we limited our search by  
14 language and publication dates. Relevant studies in languages other than English or French  
15 may thus have been missed. We believe our inclusion of evidence published after 1995 to  
16 be reasonable, as bibliometric analyses have shown that UHC publications began to  
17 increase after the adoption of MDGs in 2000 (8), and the study periods of the included  
18 reviews spanned 1990 and 2020. Second, since our objective was to describe knowledge  
19 gaps within the academic evidence base, we relied on published peer-reviewed work,  
20 rather than grey literature. Third, we employed descriptive content analysis methods,  
21 which involve greater reliance on the original study authors' interpretations. Importantly,  
22 as performing a critical appraisal of the quality of the evidence is outside the scope of a  
23 scoping review (24), we are unable to make robust conclusions regarding the evidence of  
24 intervention effectiveness (99). The identified evidence gaps should be interpreted as a  
25 descriptive summary of research needs characterized by the authors of the included  
26 reviews, rather than our own inferences. Participatory approaches, such as Delphi panels  
27 and stakeholder interviews, should follow the present work in order to rank the identified  
28 research priorities and further develop the UHC research agenda (14). Fourth, while an  
29 advantage of overviews is their provision of an overall picture of a research field or  
30 phenomenon (21), most of the included reviews were multi-country and/or multi-region  
31 studies with limited information on the sociopolitical, legal, and fiscal contexts within  
32 which FRP efforts were undertaken. Fifth, while we did not select for specific literature  
33 review study designs, the overrepresentation of LMIC among the included studies may be  
34 owed to more evidence syntheses on UHC in these settings, but not necessarily a lack of  
35 primary studies in HIC.  
36  
37  
38  
39  
40  
41  
42  
43  
44  
45  
46  
47  
48  
49  
50  
51  
52  
53  
54  
55  
56  
57  
58  
59  
60

## **Conclusion**

This scoping overview of reviews summarized what is known about achieving UHC through FRP and found evidence gaps related to the effectiveness, cost-effectiveness, and equity implications of FRP interventions. Theory-informed, high-quality mixed methods research using longitudinal and disaggregated data is needed to address the identified gaps.

**AUTHOR CONTRIBUTION:** *Dominika Bhatia*: conceptualization, methodology, data curation, investigation, formal analysis, writing – original draft, writing – review & editing, project administration. *Sujata Mishra*: conceptualization, methodology, data curation, investigation, formal analysis, writing – original draft, writing – review & editing. *Abirami Kirubarajan*: conceptualization, methodology, writing – review & editing. *Bernice Yanful*: conceptualization, methodology, writing – review & editing. *Sara Allin*: conceptualization, methodology, resources, funding acquisition, supervision. *Erica Di Ruggiero*: conceptualization, methodology, resources, funding acquisition, supervision. Erica Di Ruggiero and Sara Allin are co-senior authors of this work. Erica Di Ruggiero is the guarantor of this research and accepts full responsibility for the finished work and the conduct of the study, had access to the data, and controlled the decision to publish.

**ACKNOWLEDGEMENTS:** We gratefully acknowledge Vincci Lui (Gerstein Science Information Centre, University of Toronto) for providing expert advice on the bibliographic database search strategy. We also thank our grant collaborators, Drs. Beverley Essue, Garry Aslanyan, Miguel Gonzalez Block, Gregory Marchildon, and Jeremy Veillard, for their helpful comments on earlier versions of this work.

**FUNDING:** This research was supported by a grant to Drs. Erica Di Ruggiero and Sara Allin from the Canadian Institutes for Health Research (CIHR) (#407149) for the project titled “Towards Equitable Universal Health Coverage in a Globalized Era: A Research Agenda-Setting Workshop”.

**COMPETING INTERESTS:** The authors have no competing interest to declare.

**ETHICS APPROVAL:** Not required.

**DATA SHARING:** This work analyzed secondary sources, which are cited and are accessible publicly or with academic institutional credentials. Full search strategies are provided in the supplementary material.

## REFERENCES

1. World Health Assembly. WHA58.33 Sustainable health financing, universal coverage and social health insurance [Internet]. World Health Organization; 2005. Available from: [http://apps.who.int/iris/bitstream/handle/10665/20383/WHA58\\_33-en.pdf?sequence=1](http://apps.who.int/iris/bitstream/handle/10665/20383/WHA58_33-en.pdf?sequence=1)
2. Department of Economic and Social Affairs, Sustainable Development. Goal 3: Ensure healthy lives and promote well-being for all at all ages [Internet]. United Nations. 2021. Available from: <https://sdgs.un.org/goals/goal3>
3. World Health Organization. Thirteenth General Programme of Work 2019–2023 [Internet]. World Health Organization; 2019. Available from: <https://www.who.int/about/what-we-do/thirteenth-general-programme-of-work-2019---2023>
4. World Health Organization. Primary health care on the road to universal health coverage: 2019 monitoring report: executive summary [Internet]. World Health Organization; 2019. Available from: <https://www.who.int/docs/default-source/documents/2019-uhc-report-executive-summary>
5. Lozano R, Fullman N, Mumford JE, Knight M, Barthelemy CM, Abbafati C, et al. Measuring universal health coverage based on an index of effective coverage of health services in 204 countries and territories, 1990–2019: a systematic analysis for the Global Burden of Disease Study 2019. *The Lancet*. 2020 Oct;396(10258):1250–84.
6. World Health Organization. The world health report: health systems financing: the path to universal coverage [Internet]. Geneva, Switzerland: World Health Organization; 2010. Available from: [https://apps.who.int/iris/bitstream/handle/10665/44371/9789241564021\\_eng.pdf?sequence=1&isAllowed=y](https://apps.who.int/iris/bitstream/handle/10665/44371/9789241564021_eng.pdf?sequence=1&isAllowed=y)
7. Micah AE, Su Y, Bachmeier SD, Chapin A, Cogswell IE, Crosby SW, et al. Health sector spending and spending on HIV/AIDS, tuberculosis, and malaria, and development assistance for health: progress towards Sustainable Development Goal 3. *The Lancet*. 2020 Sep;396(10252):693–724.

- 1
  - 2
  - 3
  - 4
  - 5
  - 6
  - 7
  - 8
  - 9
  - 10
  - 11
  - 12
  - 13
  - 14
  - 15
  - 16
  - 17
  - 18
  - 19
  - 20
  - 21
  - 22
  - 23
  - 24
  - 25
  - 26
  - 27
  - 28
  - 29
  - 30
  - 31
  - 32
  - 33
  - 34
  - 35
  - 36
  - 37
  - 38
  - 39
  - 40
  - 41
  - 42
  - 43
  - 44
  - 45
  - 46
  - 47
  - 48
  - 49
  - 50
  - 51
  - 52
  - 53
  - 54
  - 55
  - 56
  - 57
  - 58
  - 59
  - 60
8. Ghanbari MK, Behzadifar M, Doshmangir L, Martini M, Bakhtiari A, Alikhani M, et al. Mapping Research Trends of Universal Health Coverage From 1990 to 2019: Bibliometric Analysis. *JMIR Public Health Surveill*. 2021 Jan 11;7(1):e24569.
9. Saksena P, Hsu J, Evans DB. Financial Risk Protection and Universal Health Coverage: Evidence and Measurement Challenges. *PLoS Med*. 2014 Sep 22;11(9):e1001701.
10. Abihiro GA, De Allegri M. Universal health coverage from multiple perspectives: a synthesis of conceptual literature and global debates. *BMC Int Health Hum Rights*. 2015 Dec;15(1):17.
11. O'Connell T, Rasanathan K, Chopra M. What does universal health coverage mean? *The Lancet*. 2014 Jan;383(9913):277–9.
12. Stuckler D, Feigl A, Basu S, Mckee M. The political economy of universal health coverage. Background paper for the global symposium on health systems research. In: *Science to Accelerate Universal Health Coverage*. Montreux, Switzerland: World Health Organization; 2010.
13. Gluckman PD, Bardsley A, Kaiser M. Brokerage at the science–policy interface: from conceptual framework to practical guidance. *Humanit Soc Sci Commun*. 2021 Dec;8(1):84.
14. Ranson MK, Bennett SC. Priority setting and health policy and systems research. *Health Research Policy and Systems* [Internet]. 2009 Dec [cited 2020 Apr 26];7(1). Available from: <https://health-policy-systems.biomedcentral.com/articles/10.1186/1478-4505-7-27>
15. Nyanchoka L, Tudur-Smith C, Thu VN, Iversen V, Tricco AC, Porcher R. A scoping review describes methods used to identify, prioritize and display gaps in health research. *Journal of Clinical Epidemiology*. 2019 May;109:99–110.
16. Lund H, Brunnhuber K, Juhl C, Robinson K, Leenaars M, Dorch B, et al. Towards evidence-based research. *BMJ*. 2016 Oct 21;355(i5440):1–5.
17. Bennett S, Jessani N, Glandon D, Qiu M, Scott K, Meghani A, et al. Understanding the implications of the Sustainable Development Goals for health policy and systems research: results of a research priority setting exercise. *Globalization and Health* [Internet]. 2020 Dec [cited 2020 Apr 23];16(1). Available from: <https://globalizationandhealth.biomedcentral.com/articles/10.1186/s12992-019-0534-2>
18. Qiu M, Jessani N, Bennett S. Identifying health policy and systems research priorities for the sustainable development goals: social protection for health. *International Journal for Equity in Health* [Internet]. 2018 Dec [cited 2020 Nov 2];17(1). Available from: <https://equityhealthj.biomedcentral.com/articles/10.1186/s12939-018-0868-z>
19. Hunter BM, Murray SF. Demand-side financing for maternal and newborn health: what do we know about factors that affect implementation of cash transfers and voucher

- 1  
2  
3 programmes? BMC Pregnancy and Childbirth [Internet]. 2017 Dec [cited 2020 Nov  
4 17];17(1). Available from:  
5 <http://bmcpregnancychildbirth.biomedcentral.com/articles/10.1186/s12884-017-1445-y>  
6  
7
- 8 20. Pollock M, Fernandes RM, Becker LA, Featherstone R, Hartling L. What guidance is  
9 available for researchers conducting overviews of reviews of healthcare interventions? A  
10 scoping review and qualitative metasummary. *Syst Rev*. 2016 Dec;5(1):190.  
11
  - 12 21. Aromataris E, Fernandez R, Godfrey CM, Holly C, Khalil H, Tungpunkom P. Summarizing  
13 systematic reviews: methodological development, conduct and reporting of an umbrella  
14 review approach. *International Journal of Evidence-Based Healthcare*. 2015  
15 Sep;13(3):132–40.  
16
  - 17 22. Robinson KA, Saldanha IJ, Mckoy NA. Development of a framework to identify research  
18 gaps from systematic reviews. *Journal of Clinical Epidemiology*. 2011 Dec;64(12):1325–30.  
19
  - 20 23. Gates M, Gates A, Guitard S, Pollock M, Hartling L. Guidance for overviews of reviews  
21 continues to accumulate, but important challenges remain: a scoping review. *Syst Rev*.  
22 2020 Dec;9(1):254.  
23
  - 24 24. Peters MDJ, Marnie C, Tricco AC, Pollock D, Munn Z, Alexander L, et al. Updated  
25 methodological guidance for the conduct of scoping reviews. *JBIM Evidence Synthesis*. 2020  
26 Oct;18(10):2119–26.  
27
  - 28 25. Glandon D, Meghani A, Jessani N, Qiu M, Bennett S. Identifying health policy and systems  
29 research priorities on multisectoral collaboration for health in low-income and middle-  
30 income countries. *BMJ Global Health*. 2018 Oct;3(Suppl 4):e000970.  
31
  - 32 26. Arksey H, O'Malley L. Scoping studies: towards a methodological framework. *International*  
33 *journal of social research methodology*. 2005;8(1):19–32.  
34
  - 35 27. Levac D, Colquhoun H, O'Brien KK. Scoping studies: advancing the methodology.  
36 *Implementation science : IS*. 2010 Sep 20;5:69.  
37
  - 38 28. Colquhoun HL, Levac D, O'Brien KK, Straus S, Tricco AC, Perrier L, et al. Scoping reviews:  
39 time for clarity in definition, methods, and reporting. *Journal of clinical epidemiology*.  
40 2014 Dec;67(12):1291–4.  
41
  - 42 29. Tricco AC, Lillie E, Zarin W, O'Brien KK, Colquhoun H, Levac D. PRISMA Extension for  
43 Scoping Reviews (PRISMA-ScR): Checklist and Explanation. *Ann Intern Medicine*.  
44 2018;169:467–73.  
45
  - 46 30. Mishra S, Bhatia D, Allin S, Yanful B, Kirubarajan A, Di Ruggiero E. Financial Risk Protection  
47 under Universal Health Coverage: A Scoping Review Protocol [Internet]. *Open Science*  
48 *Framework*; 2020. Available from:  
49 [https://osf.io/kqamx/?view\\_only=6315dbae7133475d8a294ff9db45df01](https://osf.io/kqamx/?view_only=6315dbae7133475d8a294ff9db45df01)  
50  
51



- 1  
2  
3 31. World Health Organization. Millennium Development Goals (MDGs) [Internet]. World  
4 Health Organization; 2018. Available from: [https://www.who.int/news-room/fact-](https://www.who.int/news-room/fact-sheets/detail/millennium-development-goals-(mdgs))  
5 [sheets/detail/millennium-development-goals-\(mdgs\)](https://www.who.int/news-room/fact-sheets/detail/millennium-development-goals-(mdgs))  
6  
7
- 8 32. InterTASC Information Specialists SubGroup. Systematic Reviews: Filters [Internet].  
9 InterTASC Information Specialists SubGroup; 2020. Available from:  
10 [https://sites.google.com/a/york.ac.uk/issg-search-filters-resource/home/systematic-](https://sites.google.com/a/york.ac.uk/issg-search-filters-resource/home/systematic-reviews?authuser=0)  
11 [reviews?authuser=0](https://sites.google.com/a/york.ac.uk/issg-search-filters-resource/home/systematic-reviews?authuser=0)  
12
- 13  
14 33. Hosking J, Macmillan A, Jones R, Ameratunga S, Woodward A. Searching for health equity:  
15 validation of a search filter for ethnic and socioeconomic inequalities in transport.  
16 Systematic Reviews [Internet]. 2019 Dec [cited 2020 Apr 26];8(1). Available from:  
17 [https://systematicreviewsjournal.biomedcentral.com/articles/10.1186/s13643-019-1009-](https://systematicreviewsjournal.biomedcentral.com/articles/10.1186/s13643-019-1009-5)  
18 [5](https://systematicreviewsjournal.biomedcentral.com/articles/10.1186/s13643-019-1009-5)  
19
- 20  
21 34. Connected Papers [Internet]. 2021. Available from:  
22 <https://www.connectedpapers.com/about>  
23
- 24 35. Higgins JPT, Green S. Cochrane Handbook for Systematic Reviews of Interventions.  
25 [Internet]. Version 5.1.0 [updated March 2011]. The Cochrane Collaboration; 2011.  
26 Available from: <http://handbook.cochrane.org>  
27  
28
- 29 36. Sandelowski M. Whatever happened to qualitative description? Research in Nursing &  
30 Health. 2000;23:334–40.  
31
- 32 37. Sandelowski M. What’s in a name? Qualitative description revisited: QUALITATIVE  
33 DESCRIPTION REVISITED. Res Nurs Health. 2010 Feb;33(1):77–84.  
34  
35
- 36 38. Wiysonge C.S., Paulsen E., Lewin S., Ciapponi A., Herrera C.A., Opiyo N., et al. Financial  
37 arrangements for health systems in low-income countries: An overview of systematic  
38 reviews. Cochrane Database Syst Rev. 2017;2017(9):CD011084.  
39
- 40 39. Bright T, Felix L, Kuper H, Polack S. A systematic review of strategies to increase access to  
41 health services among children in low and middle income countries. BMC Health Services  
42 Research [Internet]. 2017 Dec [cited 2020 Nov 17];17(1). Available from:  
43 <http://bmchealthservres.biomedcentral.com/articles/10.1186/s12913-017-2180-9>  
44  
45
- 46 40. Yerramilli P, Fernández Ó, Thomson S. Financial protection in Europe: a systematic review  
47 of the literature and mapping of data availability. Health Policy. 2018 May;122(5):493–  
48 508.  
49  
50
- 51 41. van Hees SGM, O’Fallon T, Hofker M, Dekker M, Polack S, Banks LM, et al. Leaving no one  
52 behind? Social inclusion of health insurance in low- and middle-income countries: a  
53 systematic review. International Journal for Equity in Health [Internet]. 2019 Dec [cited  
54 2020 Dec 7];18(1). Available from:  
55 <https://equityhealthj.biomedcentral.com/articles/10.1186/s12939-019-1040-0>  
56  
57

- 1  
2  
3  
4  
5  
6  
7  
8  
9  
10  
11  
12  
13  
14  
15  
16  
17  
18  
19  
20  
21  
22  
23  
24  
25  
26  
27  
28  
29  
30  
31  
32  
33  
34  
35  
36  
37  
38  
39  
40  
41  
42  
43  
44  
45  
46  
47  
48  
49  
50  
51  
52  
53  
54  
55  
56  
57  
58  
59  
60
42. Fadlallah R, El-Jardali F, Hemadi N, Morsi RZ, Abou Samra CA, Ahmad A, et al. Barriers and facilitators to implementation, uptake and sustainability of community-based health insurance schemes in low- and middle-income countries: a systematic review. *International Journal for Equity in Health* [Internet]. 2018 Dec [cited 2020 Dec 7];17(1). Available from: <https://equityhealthj.biomedcentral.com/articles/10.1186/s12939-018-0721-4>
  43. Uzochukwu B, Ughasoro M, Okwuosa C, Onwujekwe O, Envuladu E, Etiaba E. Health care financing in Nigeria: Implications for achieving universal health coverage. *Nigerian Journal of Clinical Practice*. 2015;18(4):437.
  44. Prinja S, Chauhan AS, Karan A, Kaur G, Kumar R. Impact of Publicly Financed Health Insurance Schemes on Healthcare Utilization and Financial Risk Protection in India: A Systematic Review. Xia C-Y, editor. *PLOS ONE*. 2017 Feb 2;12(2):e0170996.
  45. Myint C-Y, Pavlova M, Thein K-N-N, Groot W. A systematic review of the health-financing mechanisms in the Association of Southeast Asian Nations countries and the People's Republic of China: Lessons for the move towards universal health coverage. Hotchkiss D, editor. *PLOS ONE*. 2019 Jun 14;14(6):e0217278.
  46. Sum G, Hone T, Atun R, Millett C, Suhrcke M, Mahal A, et al. Multimorbidity and out-of-pocket expenditure on medicines: a systematic review. *BMJ Global Health*. 2018 Feb;3(1):e000505.
  47. Njagi P, Arsenijevic J, Groot W. Understanding variations in catastrophic health expenditure, its underlying determinants and impoverishment in Sub-Saharan African countries: a scoping review. *Systematic Reviews* [Internet]. 2018 Dec [cited 2020 Dec 6];7(1). Available from: <https://systematicreviewsjournal.biomedcentral.com/articles/10.1186/s13643-018-0799-1>
  48. Docrat S, Besada D, Cleary S, Lund C. The impact of social, national and community-based health insurance on health care utilization for mental, neurological and substance-use disorders in low- and middle-income countries: a systematic review. *Health Economics Review* [Internet]. 2020 Dec [cited 2020 Dec 6];10(1). Available from: <https://healthconomicsreview.biomedcentral.com/articles/10.1186/s13561-020-00268-x>
  49. Adebayo EF, Uthman OA, Wiysonge CS, Stern EA, Lamont KT, Ataguba JE. A systematic review of factors that affect uptake of community-based health insurance in low-income and middle-income countries. *BMC Health Services Research* [Internet]. 2015 Jun [cited 2020 Nov 17];15(1). Available from: <http://bmchealthservres.biomedcentral.com/articles/10.1186/s12913-015-1179-3>
  50. Izzanie M, Khaled N, Aidalina M. HEALTH INSURANCE INEQUITY IN SELECTED ASIA COUNTRIES. *International Journal of Public Health and Clinical Sciences* [Internet]. 2019

Nov 1 [cited 2020 Dec 7];6(5). Available from:  
<http://publichealthmy.org/ejournal/ojs2/index.php/ijphcs/article/view/1046/671>

51. Koch KJ, Cid Pedraza C, Schmid A. Out-of-pocket expenditure and financial protection in the Chilean health care system—A systematic review. *Health Policy*. 2017 May;121(5):481–94.
52. Lagomarsino G, Garabrant A, Adyas A, Muga R, Otoo N. Moving towards universal health coverage: health insurance reforms in nine developing countries in Africa and Asia. *The Lancet*. 2012 Sep;380(9845):933–43.
53. Artignan J, Bellanger M. Does community-based health insurance improve access to care in sub-Saharan Africa? A rapid review. *Health Policy and Planning*. 2021 May 17;36(4):572–84.
54. Bhanvadia SK, Psutka SP, Burg ML, de Wit R, Dhillon HM, Gyawali B, et al. Financial Toxicity Among Patients with Prostate, Bladder, and Kidney Cancer: A Systematic Review and Call to Action. *European Urology Oncology*. 2021 Jun;4(3):396–404.
55. Doshmangir L, Yousefi M, Hasanpoor E, Eshtiagh B, Haghparast-Bidgoli H. Determinants of catastrophic health expenditures in Iran: a systematic review and meta-analysis. *Cost Eff Resour Alloc*. 2020 Dec;18(1):17.
56. Hussien M, Azage M. Barriers and Facilitators of Community-Based Health Insurance Policy Renewal in Low- and Middle-Income Countries: A Systematic Review. *CEOR*. 2021 May;Volume 13:359–75.
57. Ifeagwu SC, Yang JC, Parkes-Ratanshi R, Brayne C. Health financing for universal health coverage in Sub-Saharan Africa: a systematic review. *glob health res policy*. 2021 Dec;6(1):8.
58. Longo CJ, Fitch MI, Banfield L, Hanly P, Yabroff KR, Sharp L. Financial toxicity associated with a cancer diagnosis in publicly funded healthcare countries: a systematic review. *Support Care Cancer*. 2020 Oct;28(10):4645–65.
59. Motaze NV, Chi PC, Ongolo-Zogo P, Ndongo JS, Wiysonge CS. Government regulation of private health insurance. *Cochrane Effective Practice and Organisation of Care Group, editor. Cochrane Database of Systematic Reviews [Internet]*. 2021 Feb 22 [cited 2021 Sep 15];2021(2). Available from: <http://doi.wiley.com/10.1002/14651858.CD011512.pub2>
60. Odoch WD, Senkubuge F, Hongoro C. How has sustainable development goals declaration influenced health financing reforms for universal health coverage at the country level? A scoping review of literature. *Global Health*. 2021 Dec;17(1):50.

- 1  
2  
3 61. Platt E, Doe M, Kim NE, Chirengendure B, Musonda P, Kaja S, et al. Economic impact of  
4 surgery on households and individuals in low income countries: A systematic review.  
5 International Journal of Surgery. 2021 Jun;90:105956.  
6  
7
- 8 62. Ravindran TKS, Govender V. Sexual and reproductive health services in universal health  
9 coverage: a review of recent evidence from low- and middle-income countries. Sexual and  
10 Reproductive Health Matters. 2020 Dec 17;28(2):1779632.  
11
- 12 63. Sanogo NA, Fantaye AW, Yaya S. Universal Health Coverage and Facilitation of Equitable  
13 Access to Care in Africa. Frontiers in Public Health [Internet]. 2019 Apr 26 [cited 2020 Nov  
14 17];7. Available from: <https://www.frontiersin.org/article/10.3389/fpubh.2019.00102/full>  
15  
16
- 17 64. Okoroh J, Essoun S, Seddoh A, Harris H, Weissman JS, Dsane-Selby L, et al. Evaluating the  
18 impact of the national health insurance scheme of Ghana on out of pocket expenditures: a  
19 systematic review. BMC Health Services Research [Internet]. 2018 Dec [cited 2020 Dec  
20 6];18(1). Available from:  
21 <https://bmchealthservres.biomedcentral.com/articles/10.1186/s12913-018-3249-9>  
22  
23
- 24 65. Comfort AB, Peterson LA, Hatt LE. Effect of Health Insurance on the Use and Provision of  
25 Maternal Health Services and Maternal and Neonatal Health Outcomes: A Systematic  
26 Review. 2013;31(4):25.  
27  
28
- 29 66. Van Minh H, Pocock NS, Chaiyakunapruk N, Chhorvann C, Duc HA, Hanvoravongchai P, et  
30 al. Progress toward universal health coverage in ASEAN. Global Health Action. 2014  
31 Dec;7(1):25856.  
32
- 33 67. Ökem ZG, Çakar M. What have health care reforms achieved in Turkey? An appraisal of the  
34 “Health Transformation Programme.” Health Policy. 2015 Sep;119(9):1153–63.  
35  
36
- 37 68. Okedo-Alex IN, Akamike IC, Ezeanosike OB, Uneke CJ. A review of the incidence and  
38 determinants of catastrophic health expenditure in Nigeria: Implications for universal  
39 health coverage. The International Journal of Health Planning and Management [Internet].  
40 2019 Oct [cited 2020 Dec 8];34(4). Available from:  
41 <https://onlinelibrary.wiley.com/doi/abs/10.1002/hpm.2847>  
42  
43
- 44 69. Odeyemi IA, Nixon J. Assessing equity in health care through the national health insurance  
45 schemes of Nigeria and Ghana: a review-based comparative analysis. Int J Equity Health.  
46 2013;12(1):9.  
47  
48
- 49 70. Erlangga D, Suhrcke M, Ali S, Bloor K. The impact of public health insurance on health care  
50 utilisation, financial protection and health status in low- and middle-income countries: A  
51 systematic review. Buttigieg SC, editor. PLOS ONE. 2019 Aug 28;14(8):e0219731.  
52
- 53 71. Rezaei S, Woldemichael A, Hajizadeh M, Kazemi Karyani A. Catastrophic healthcare  
54 expenditures among Iranian households: a systematic review and meta-analysis.  
55 International Journal of Human Rights in Healthcare. 2019 May 7;12(2):105–15.  
56  
57

- 1
  - 2
  - 3
  - 4
  - 5
  - 6
  - 7
  - 8
  - 9
  - 10
  - 11
  - 12
  - 13
  - 14
  - 15
  - 16
  - 17
  - 18
  - 19
  - 20
  - 21
  - 22
  - 23
  - 24
  - 25
  - 26
  - 27
  - 28
  - 29
  - 30
  - 31
  - 32
  - 33
  - 34
  - 35
  - 36
  - 37
  - 38
  - 39
  - 40
  - 41
  - 42
  - 43
  - 44
  - 45
  - 46
  - 47
  - 48
  - 49
  - 50
  - 51
  - 52
  - 53
  - 54
  - 55
  - 56
  - 57
  - 58
  - 59
  - 60
72. Vaidya S, Boes S. Strategies to mitigate inequity within mandatory health insurance systems: A systematic review. *World Medical & Health Policy*. 2021 Jun;13(2):272–92.
73. Wu R, Li N, Ercia A. The Effects of Private Health Insurance on Universal Health Coverage Objectives in China: A Systematic Literature Review. *IJERPH*. 2020 Mar 19;17(6):2049.
74. Mathauer I, Saksena P, Kutzin J. Pooling arrangements in health financing systems: a proposed classification. *International Journal for Equity in Health* [Internet]. 2019 Dec [cited 2020 Nov 17];18(1). Available from: <https://equityhealthj.biomedcentral.com/articles/10.1186/s12939-019-1088-x>
75. Angell B, Dodd R, Palagyi A, Gadsden T, Abimbola S, Prinja S, et al. Primary health care financing interventions: a systematic review and stakeholder-driven research agenda for the Asia-Pacific region. *BMJ Global Health*. 2019 Aug;4(Suppl 8):e001481.
76. Acharya A, Vellakkal S, Taylor F, Masset E, Satija A, Burke M, et al. The Impact of Health Insurance Schemes for the Informal Sector in Low- and Middle-Income Countries: A Systematic Review. *The World Bank Research Observer*. 2013 Aug 1;28(2):236–66.
77. Bazyar M, Yazdi-Feyzabadi V, Rashidian A, Behzadi A. The experiences of merging health insurance funds in South Korea, Turkey, Thailand, and Indonesia: a cross-country comparative study. *Int J Equity Health*. 2021 Dec;20(1):66.
78. Spaan E, Mathijssen J, Tromp N, McBain F, ten Have A, Baltussen R. The impact of health insurance in Africa and Asia: a systematic review. *Bull World Health Org*. 2012 Sep 1;90(9):685–92.
79. Christmals CD, Aidam K. Implementation of the National Health Insurance Scheme (NHIS) in Ghana: Lessons for South Africa and Low- and Middle-Income Countries. *RMHP*. 2020 Oct;Volume 13:1879–904.
80. Odeyemi IA. Community-based health insurance programmes and the national health insurance scheme of Nigeria: challenges to uptake and integration. *International Journal for Equity in Health*. 2014;13(1):20.
81. Bucagu M, Kagubare JM, Basinga P, Ngabo F, Timmons BK, Lee AC. Impact of health systems strengthening on coverage of maternal health services in Rwanda, 2000–2010: a systematic review. *Reproductive Health Matters*. 2012 Jan;20(39):50–61.
82. Salmi L-R, Barsanti S, Bourgueil Y, Daponte A, Piznal E, Ménival S, et al. Interventions addressing health inequalities in European regions: the AIR project. *Health Promotion International*. 2017 Jun 1;32(3):430–41.
83. Aragão FBA, Arcêncio RA, Fuentealba-Torres M, Carneiro TSG, Souza LLL, Alves YM, et al. Impact of social protection programs on adults diagnosed with Tuberculosis: systematic review. *Rev Bras Enferm*. 2021;74(3):e20190906.

- 1
  - 2
  - 3
  - 4
  - 5
  - 6
  - 7
  - 8
  - 9
  - 10
  - 11
  - 12
  - 13
  - 14
  - 15
  - 16
  - 17
  - 18
  - 19
  - 20
  - 21
  - 22
  - 23
  - 24
  - 25
  - 26
  - 27
  - 28
  - 29
  - 30
  - 31
  - 32
  - 33
  - 34
  - 35
  - 36
  - 37
  - 38
  - 39
  - 40
  - 41
  - 42
  - 43
  - 44
  - 45
  - 46
  - 47
  - 48
  - 49
  - 50
  - 51
  - 52
  - 53
  - 54
  - 55
  - 56
  - 57
  - 58
  - 59
  - 60
84. Meng Q, Yuan B, Jia L, Wang J, Yu B, Gao J, et al. Expanding health insurance coverage in vulnerable groups: a systematic review of options. *Health Policy and Planning*. 2011 Mar 1;26(2):93–104.
85. Bellows BW, Conlon CM, Higgs ES, Townsend JW, Nahed MG, Cavanaugh K, et al. A Taxonomy and Results from a Comprehensive Review of 28 Maternal Health Voucher Programmes. 2013;31(4):23.
86. Grainger C, Gorter A, Okal J, Bellows B. Lessons from sexual and reproductive health voucher program design and function: a comprehensive review. *International Journal for Equity in Health*. 2014;13(1):33.
87. Seidman G. Does SDG 3 have an adequate theory of change for improving health systems performance? *Journal of Global Health*. 2017 Jun;7(1):010302.
88. Aftab W, Siddiqui FJ, Tasic H, Perveen S, Siddiqi S, Bhutta ZA. Implementation of health and health-related sustainable development goals: progress, challenges and opportunities – a systematic literature review. *BMJ Glob Health*. 2020 Aug;5(8):e002273.
89. Luz A, Santatiwongchai B, Pattanaphesaj J, Teerawattananon Y. Identifying priority technical and context-specific issues in improving the conduct, reporting and use of health economic evaluation in low- and middle-income countries. *Health Res Policy Sys*. 2018 Dec;16(1):4.
90. Griffiths UK, Legood R, Pitt C. Comparison of Economic Evaluation Methods Across Low-income, Middle-income and High-income Countries: What are the Differences and Why?: Economic Evaluation Methods: Differences Across Country Income Groups. *Health Econ*. 2016 Feb;25:29–41.
91. Levy H, Meltzer D. The Impact of Health Insurance on Health. *Annu Rev Public Health*. 2008 Apr;29(1):399–409.
92. Hung YW, Hoxha K, Irwin BR, Law MR, Grépin KA. Using routine health information data for research in low- and middle-income countries: a systematic review. *BMC Health Serv Res*. 2020 Dec;20(1):790.
93. Ogilvie D, Cummins S, Petticrew M, White M, Jones A, Wheeler K. Assessing the Evaluability of Complex Public Health Interventions: Five Questions for Researchers, Funders, and Policymakers. *The Milbank Quarterly*. 2011 Jun;89(2):206–25.
94. McGill E, Marks D, Er V, Penney T, Petticrew M, Egan M. Qualitative process evaluation from a complex systems perspective: A systematic review and framework for public health evaluators. Kruk ME, editor. *PLoS Med*. 2020 Nov 2;17(11):e1003368.

- 1  
2  
3 95. Hogan DR, Stevens GA, Hosseinpoor AR, Boerma T. Monitoring universal health coverage  
4 within the Sustainable Development Goals: development and baseline data for an index of  
5 essential health services. *The Lancet Global Health*. 2018 Feb;6(2):e152–68.  
6  
7  
8 96. Thomson S, Cylus J, Evetovits T, Srakar A. Can people afford to pay for health care? new  
9 evidence on financial protection in Europe: [regional report [Internet]. Copenhagen: World  
10 Health Organization, Regional Office for Europe; 2019 [cited 2020 Apr 23]. Available from:  
11 [https://apps.who.int/iris/bitstream/handle/10665/311654/9789289054058-](https://apps.who.int/iris/bitstream/handle/10665/311654/9789289054058-eng.pdf?sequence=1&isAllowed=y)  
12 [eng.pdf?sequence=1&isAllowed=y](https://apps.who.int/iris/bitstream/handle/10665/311654/9789289054058-eng.pdf?sequence=1&isAllowed=y)  
13  
14  
15 97. Rodney AM, Hill PS. Achieving equity within universal health coverage: a narrative review  
16 of progress and resources for measuring success. *International Journal for Equity in Health*  
17 [Internet]. 2014 Dec [cited 2020 Apr 24];13(1). Available from:  
18 <http://equityhealthj.biomedcentral.com/articles/10.1186/s12939-014-0072-8>  
19  
20  
21 98. Amri MM, Jessiman-Perreault G, Siddiqi A, O’Campo P, Enright T, Di Ruggiero E. Scoping  
22 review of the World Health Organization’s underlying equity discourses: apparent  
23 ambiguities, inadequacy, and contradictions. *Int J Equity Health*. 2021 Dec;20(1):70.  
24  
25  
26 99. Green S, Higgins JPT, Schünemann HJ, Becker L. Response to paper by Lang A, Edwards N,  
27 and Fleischer A. *Journal of Clinical Epidemiology*. 2007 Jun;60(6):598–9.  
28  
29  
30  
31  
32  
33

## 34 **Tables and figures**

### 35 **Tables**

36  
37  
38  
39 **Table 1.** Characteristics of the included studies

40  
41 **Table 2.** Summary of the characteristics of the included studies

42  
43 **Table 3.** Evidence gaps identified from the literature  
44  
45

### 46 **Figures**

47  
48 **Figure 1.** PRISMA study selection flowchart

49  
50 **Figure 2.** Concept map of financial risk protection interventions, impacts, evidence gaps,  
51 and methodological considerations  
52  
53  
54  
55  
56  
57  
58  
59  
60

**Table 1.** Characteristics of the included studies

| Study                      | Study design | Resource level | Geographic regions       | FRP defined? | FRP interventions | FRP measures   | No. studies         | No. databases       | Study period |
|----------------------------|--------------|----------------|--------------------------|--------------|-------------------|----------------|---------------------|---------------------|--------------|
| Acharya 2012 (76)          | SR           | LMIC           | AFR, EUR, PAR, SEAR, WPR | No           | PA                | CHE, OOPE      | 24                  | 10 academic, 3 grey | ≤2010        |
| Adebayo 2015 (49)          | SR           | LMIC           | AFR, PAR, SEAR, WPR      | No           | EC                | OOPE           | 25                  | 17                  | 2003-2013    |
| Angell 2019 (75)           | SR, Delphi   | HIC, LMIC      | SEAR, WPR                | No           | PA                | CHE, OOPE      | 31 studies, 10 grey | 3 academic, 14 grey | 2008-2018    |
| Aragão 2021 (83)           | SR           | LMIC           | AFR, PAR, SEAR           | No           | EC, FI            | NS             | 9                   | 5                   | ≤2019        |
| Artignan 2021 (53)         | RR           | LMIC           | AFR                      | Yes          | PA                | NS             | 16                  | 3                   | ≤2019        |
| Bazyar 2021 (77)           | CA           | HIC, LMIC      | EUR, SEAR, WPR           | No           | PA                | NS             | NS                  | 3 academic, 3 grey  | ≤2020        |
| Bhanvadia et al. 2021 (54) | SR           | HIC, LMIC      | EUR, PAR, WPR            | Yes          | NS                | OOPE           | 23                  | 5                   | ≤2020        |
| Bellows 2013 (85)          | NR           | LMIC           | AFR, EMR, EUR, WPR       | No           | FI                | NS             | 28 voucher programs | NS                  | 1995-2011    |
| Bright 2017 (39)           | SR           | LMIC           | AFR, PAR, SEAR, WPR      | Yes          | FI                | NS             | 57                  | 4                   | ≤2015        |
| Bucagu 2012 (81)           | SR           | LMIC           | AFR                      | No           | EC                | CHE            | 14                  | 1                   | 2005-2011    |
| Christmalls 2020 (79)      | ScR          | LMIC           | AFR                      | No           | PA                | NS             | 77                  | 5                   | 2003-2018    |
| Comfort 2013 (65)          | SR           | LMIC           | AFR, EUR, PAR, SEAR, WPR | Yes          | EC, FI            | NS             | 29                  | NS                  | 1997-2012    |
| Docrat 2020 (48)           | SR           | LMIC           | AFR, PAR, SEAR, WPR      | No           | EC                | OOPE           | 18                  | 9                   | ≤2018        |
| Doshmangir 2020 (55)       | MA           | LMIC           | EMR                      | Yes          | NS                | CHE            | 53                  | 6                   | ≤2019        |
| Erlangga 2019 (70)         | SR           | LMIC           | AFR, PAR, SEAR, WPR      | No           | EC                | CHE, IHE, OOPE | 68                  | 5 academic, 3 grey  | 2010-2016    |
| Fadlallah 2018 (42)        | SR           | LMIC           | AFR, PAR, SEAR, EUR, WPR | Yes          | EC                | OOPE           | 51                  | 6                   | 1992-2015    |
| Grainger 2014 (86)         | NR           | LMIC           | AFR, PAR, SEAR, WPR      | No           | FI                | NS             | 40 voucher programs | NS                  | ≤2011        |
| Hunter 2017 (19)           | SR           | LMIC           | AFR, PAR, SEAR, WPR      | No           | FI                | OOPE           | 98                  | 19                  | 1990-2015    |
| Hussien 2021 (56)          | SR           | LMIC           | AFR, SEAR                | Yes          | PA                | CHE, IHE, OOPE | 27                  | 3 academic, 1 grey  | 2005-2020    |
| Ifeagwu 2021 (57)          | SR           | LMIC           | AFR                      | Yes          | PA                | CHE, IHE, OOPE | 39                  | 7                   | 2005-2019    |
| Izzanie 2019 (50)          | SR           | LMIC           | SEAR, WPR                | No           | EC                | CHE, IHE, OOPE | 13                  | 4                   | 1993-2017    |
| Koch 2017(51)              | SR           | LMIC           | PAR                      | Yes          | EC                | CHE, IHE, OOPE | 16                  | 3                   | 2008-2015    |
| Lagomarsino 2012 (52)      | CA           | LMIC           | AFR, SEAR, WPR           | Yes          | EC, FI, PA        | IHE, OOPE      | NS                  | 3                   | NS           |
| Longo 2020 (58)            | SR           | HIC, LMIC      | EUR, PAR, WPR            | Yes          | NS                | OOPE           | 32                  | 6                   | 2005-2019    |
| Mathauer 2019 (74)         | CA           | NS             | NS                       | No           | PA                | OOPE           | NS                  | 2                   | NS           |



|                      |            |           |                          |     |            |                |     |                    |           |
|----------------------|------------|-----------|--------------------------|-----|------------|----------------|-----|--------------------|-----------|
| Meng 2011 (84)       | SR         | HIC, LMIC | AFR, PAR, SEAR, WPR      | No  | EC         | NS             | 86  | 45                 | 1995-2007 |
| Motaze 2021 (59)     | CR         | HIC       | PAR                      | Yes | PA         | CHE, OOPE      | 7   | 7 academic, 9 grey | ≤2019     |
| Myint 2019 (45)      | SR         | HIC, LMIC | SEAR, WPR                | No  | PA         | CHE, OOPE      | 77  | 2                  | 2010-2017 |
| Njagi 2018 (47)      | ScR        | LMIC      | AFR                      | Yes | NS         | CHE, IHE       | 34  | 5                  | 2006-2017 |
| Odeyemi 2014 (80)    | SR         | LMIC      | AFR                      | No  | EC         | CHE            | 26  | 2                  | 2003-2012 |
| Odeyemi 2013 (69)    | CA         | LMIC      | AFR                      | No  | EC         | OOPE           | 16  | 3                  | 2000-2012 |
| Odoch 2021 (60)      | ScR        | HIC, LMIC | AFR, EMR, SEAR, WPR      | Yes | PA, EC     | CHE, IHE, OOPE | 12  | 5                  | 2012-2020 |
| Okedo-Alex 2019 (68) | SR         | LMIC      | AFR                      | Yes | EC         | CHE            | 20  | 5                  | 2003-2018 |
| Okem 2015 (67)       | SR         | LMIC      | EUR                      | Yes | EC         | OOPE           | 76  | ≥10                | 2000-2012 |
| Okoroh 2018 (64)     | SR         | LMIC      | AFR                      | Yes | EC         | CHE, OOPE      | 7   | 6                  | 2003-2017 |
| Platt 2021 (61)      | SR         | LMIC      | AFR, PAR, SEAR           | Yes | NS         | CHE, OOPE      | 31  | 2                  | ≤2019     |
| Prinja 2017 (44)     | SR         | LMIC      | SEAR                     | No  | EC         | CHE, OOPE      | 14  | 4                  | 2005-2015 |
| Ravindran 2020 (62)  | NR         | LMIC      | AFR, PAR, SEAR, WPR      | Yes | PA, EC, FI | OOPE           | 253 | 2 academic, 7 grey | 2010-2019 |
| Rezaei 2019 (71)     | MA         | LMIC      | EMR                      | Yes | NS         | CHE            | 24  | 6                  | 2001-2015 |
| Salmi 2017 (82)      | SR, survey | HIC, LMIC | EUR                      | No  | EC         | NS             | 108 | 4                  | 2000-2010 |
| Sanogo 2019 (63)     | SR         | LMIC      | AFR, EUR, PAR, SEAR, WPR | No  | EC         | NS             | 12  | 4                  | 2005-2018 |
| Spaan 2012 (78)      | SR         | LMIC      | AFR, SEAR, WPR           | No  | PA         | NS             | 159 | 19                 | ≤2011     |
| Sum 2018 (46)        | SR         | HIC, LMIC | PAR, SEAR, WPR           | Yes | NS         | OOPE           | 14  | 5                  | 2000-2016 |
| Uzochukwu 2015 (43)  | SR         | LMIC      | AFR                      | Yes | PA         | IHE, OOPE      | NS  | 6                  | 2009-2014 |
| Vaidya 2021 (72)     | SR         | HIC, LMIC | EUR, PAR, SEAR           | No  | PA         | CHE, OOPE      | 50  | 3 academic, 4 grey | 2000-2019 |
| van Hees 2019 (41)   | SR         | LMIC      | AFR, PAR, SEAR, WPR      | Yes | EC         | CHE            | 44  | 11                 | 1995-2018 |
| van Minh 2014 (66)   | NR         | HIC, LMIC | SEAR, WPR                | Yes | NS         | CHE, IHE, OOPE | NS  | 8                  | 1995-2017 |
| Wiysonge 2017 (38)   | CR         | LMIC      | AFR, PAR, SEAR, WPR      | Yes | FI, PA     | CHE, OOPE      | 15  | 20                 | 2005-2016 |
| Wu 2020 (73)         | SR         | LMIC      | WPR                      | No  | PA, EC     | CHE, OOPE      | 44  | 3                  | 2000-2018 |
| Yerramilli 2018 (40) | SR         | HIC, LMIC | EUR                      | Yes | NS         | CHE, IHE, OOPE | 54  | 4                  | 1990-2017 |

Abbreviations: African region, AFR; catastrophic health expenditure, CHE; comparative analysis, CA; Cochrane review, CR; financial incentives, FI; financial risk protection, FRP; Eastern Mediterranean region, EMR; European region, EUR; expanding coverage, EC; high-income countries, HIC; impoverishing health expenditures, IHE; low- and middle-income countries, LMIC; meta-analysis, MA; not specified, NS; narrative review, NR; out-of-pocket expenditures, OOPE; Pan American region, PAR; pooling arrangements, PA; rapid review, RR; scoping review, ScR; South East Asian region, SEAR; systematic review, SR; Western Pacific region, WPR

**Table 2.** Summary of the characteristics of the included studies

| Study characteristic         | No. (%)<br>(N = 50) | References                                                             |
|------------------------------|---------------------|------------------------------------------------------------------------|
| <b>Publication year</b>      |                     |                                                                        |
| 1995-1999                    | 0 (0)               | -                                                                      |
| 2000-2004                    | 0 (0)               | -                                                                      |
| 2005-2009                    | 0 (0)               | -                                                                      |
| 2010-2014                    | 11 (22)             | (52,65,66,69,76,78,80,81,84-86)                                        |
| ≥2015                        | 39 (78)             | (19,38-51,53-64,67,68,70-75,77,79,82,83)                               |
| <b>Study period*</b>         |                     |                                                                        |
| 1990-1994                    | 16 (32)             | (19,39,40,42,48,50,53-55,59,61,76-78,83,86)                            |
| 1995-1999                    | 21 (42)             | (19,39-42,48,50,53-55,59,61,65,66,76-78,83-86)                         |
| 2000-2004                    | 33 (66)             | (19,39-42,46,48-50,53-55,59,61,64-69,71-73,76-80,82-86)                |
| 2005-2009                    | 43 (86)             | (19,38-44,46-51,53-59,61,63-69,71-73,75-86)                            |
| 2010-2020                    | 48 (96)             | (19,38-51,53-73,75-86)                                                 |
| Not specified                | 2 (4)               | (52,74)                                                                |
| <b>Resource level</b>        |                     |                                                                        |
| LMIC                         | 36 (72)             | (19,38,39,41-44,47-53,55-57,61-65,67-71,73,73,76,78-81,83,85,86)       |
| HIC                          | 1 (2)               | (59)                                                                   |
| HIC and LMIC                 | 12 (24)             | (40,45,46,54,58,60,66,72,75,77,82,84)                                  |
| Not specified                | 1 (2)               | (74)                                                                   |
| <b>Geographic regions*</b>   |                     |                                                                        |
| African region               | 31 (62)             | (19,38,39,41-43,47,49,52,53,56,57,60-65,68-70,76,78-81,83-86)          |
| European region              | 12 (24)             | (40,42,54,58,63,65,67,72,76,77,82,85)                                  |
| Eastern-Mediterranean region | 4 (8)               | (55,60,71,85)                                                          |
| South-East Asian region      | 28 (56)             | (19,38,39,41,42,44-46,48-50,52,56,61-63,65,66,70,72,75-78,83,84,86)    |
| Western-Pacific region       | 27 (54)             | (19,38,39,41,42,45,46,48-50,52,54,58,60,62,63,65,66,70,73,75-78,84-86) |
| Pan-American region          | 22 (44)             | (19,38,39,41,42,46,48,49,51,54,58,59,61-63,65,70,72,76,83,84,86)       |
| ≥2 world regions             | 27 (54)             | (19,38,39,41,42,45,46,48-50,54,56,58,60-63,65,66,70,72,75,77,83-86)    |
| Not specified                | 1 (2)               | (74)                                                                   |
| <b>Study design</b>          |                     |                                                                        |
| Systematic review            | 34 (68)             | (19,39-46,48-51,54,56-58,61,63-65,67,68,70,72,73,75,76,78,80-84)       |
| Comparative analysis         | 4 (8)               | (52,69,74,77)                                                          |
| Narrative review             | 4 (8)               | (62,66,85,86)                                                          |
| Scoping review               | 3 (6)               | (47,60,79)                                                             |
| Meta-analysis                | 2 (4)               | (55,71)                                                                |

|    |                                                 |         |                                                                     |
|----|-------------------------------------------------|---------|---------------------------------------------------------------------|
| 1  |                                                 |         |                                                                     |
| 2  |                                                 |         |                                                                     |
| 3  | Cochrane review                                 | 2 (4)   | (38,59)                                                             |
| 4  | Rapid review                                    | 1 (2)   | (53)                                                                |
| 5  |                                                 |         |                                                                     |
| 6  | <b>Target population</b>                        |         |                                                                     |
| 7  | Women and children                              | 5 (10)  | (39,62,65,81,85)                                                    |
| 8  | Low-income groups                               | 4 (8)   | (41,63,80,84)                                                       |
| 9  | Cancer                                          | 2 (4)   | (54,58)                                                             |
| 10 | Multimorbidity                                  | 1 (2)   | (46)                                                                |
| 11 | Mental health                                   | 1 (2)   | (48)                                                                |
| 12 | Tuberculosis                                    | 1 (2)   | (83)                                                                |
| 13 | Surgery                                         | 1 (2)   | (61)                                                                |
| 14 |                                                 |         |                                                                     |
| 15 | <b>Studies with concept definitions*</b>        |         |                                                                     |
| 16 | Defined universal health coverage               | 31 (62) | (38,39,41-45,48-52,55-57,59-66,68-71,73,74,85,86)                   |
| 17 | Defined financial risk protection               | 26 (52) | (38-62)                                                             |
| 18 | Defined equity                                  | 14 (28) | (40,41,45,46,50,51,63,64,69,72,75,82,84,86)                         |
| 19 |                                                 |         |                                                                     |
| 20 | <b>Financial risk protection measures*</b>      |         |                                                                     |
| 21 | Out-of-pocket expenditures                      | 31 (62) | (19,38,40,42-46,48-52,54,56-62,64,66,67,69,70,72-76)                |
| 22 | Catastrophic health expenditures                | 25 (50) | (38,40,41,44,45,47,50,51,55-57,59-61,64,66,66,68,70-73,75,76,80,81) |
| 23 | Impoverishing health expenditures               | 12 (24) | (40,43,47,50-52,56,57,60,66,70)                                     |
| 24 |                                                 |         |                                                                     |
| 25 | <b>Financial risk protection interventions*</b> |         |                                                                     |
| 26 | Pooling arrangements                            | 18 (36) | (38,43,45,52,53,56,57,59,60,62,72-79)                               |
| 27 | Expanding insurance coverage                    | 23 (46) | (41,42,44,48-52,60,62-65,67-70,73,80-84)                            |
| 28 | Financial incentives                            | 9 (18)  | (19,38,39,52,62,65,83,85,86)                                        |
| 29 |                                                 |         |                                                                     |

\*Overlapping categories

Abbreviations: high-income countries, HIC; low- and middle-income countries, LMIC

**Table 3.** Evidence gaps identified from the literature

| Category<br>No. (%)<br>(N = 50)              | Specific evidence need                                                                                                                                                                                                                                                                                                                                                                                                                                                              | References                                     |
|----------------------------------------------|-------------------------------------------------------------------------------------------------------------------------------------------------------------------------------------------------------------------------------------------------------------------------------------------------------------------------------------------------------------------------------------------------------------------------------------------------------------------------------------|------------------------------------------------|
| Evidence of effectiveness<br><br>N = 25 (50) | <i>Impact on health service utilization</i>                                                                                                                                                                                                                                                                                                                                                                                                                                         | (19,38,48,52–54,59,60,62,65,70,75–78)          |
|                                              | <ul style="list-style-type: none"> <li>Understand how pooling arrangements, expansion of insurance coverage, and financial incentives affect overall health service use and specific health service types, including unintended outcomes (e.g., incentivizing inappropriate over- or underutilization of services)</li> </ul>                                                                                                                                                       |                                                |
|                                              | <i>Impact on financial risk</i>                                                                                                                                                                                                                                                                                                                                                                                                                                                     | (40,44,46,47,51,54,57,58,61,62,64,70,75,76,78) |
|                                              | <ul style="list-style-type: none"> <li>Understand how pooling arrangements, expansion of insurance coverage, and financial incentives affect OOPE, CHE, and IHE</li> <li>Understand how pooling arrangements, expansion of insurance coverage, and financial incentives affect OOPE, CHE, and IHE related to specific health services, chronic health conditions and multimorbidity, non-medical services, or spending on premiums and entry fees into insurance schemes</li> </ul> |                                                |
|                                              | <i>Impact on experience of care</i>                                                                                                                                                                                                                                                                                                                                                                                                                                                 | (63,64,86)                                     |
|                                              | <ul style="list-style-type: none"> <li>Understand how pooling arrangements, expansion of insurance coverage, and financial incentives affect people's experiences with the healthcare system</li> </ul>                                                                                                                                                                                                                                                                             |                                                |
|                                              | <i>Impact on health status</i>                                                                                                                                                                                                                                                                                                                                                                                                                                                      | (38,65,70,75,76,78,85,86)                      |
| Equity considerations<br><br>N = 15 (30)     | <ul style="list-style-type: none"> <li>Understand how pooling arrangements, expansion of insurance coverage, and financial incentives affect population health outcomes, including morbidity, mortality, disability, and measures of utility (e.g., QALYs, DALYs)</li> </ul>                                                                                                                                                                                                        |                                                |
|                                              | <i>Stratification of FRP program coverage</i>                                                                                                                                                                                                                                                                                                                                                                                                                                       | (52,53,73,76,78,86)                            |
|                                              | <ul style="list-style-type: none"> <li>Consider proportion of population covered or served by FRP intervention that is experiencing marginalization</li> </ul>                                                                                                                                                                                                                                                                                                                      |                                                |
|                                              | <i>Stratification of FRP indicators and other outcomes</i>                                                                                                                                                                                                                                                                                                                                                                                                                          | (38–41,47,48,53,76,78,82)                      |
| Evidence of                                  | <i>Estimating resource requirements and input costs</i>                                                                                                                                                                                                                                                                                                                                                                                                                             | (19,64,75,85)                                  |

|    |               |                                                            |
|----|---------------|------------------------------------------------------------|
| 1  |               |                                                            |
| 2  |               |                                                            |
| 3  | cost-         |                                                            |
| 4  | effectiveness | • Estimate start-up, operating, and scale-up costs of      |
| 5  |               | FRP interventions using standard methods to                |
| 6  | N = 9 (18)    | enable comparability between programs                      |
| 7  |               | <i>Mobilizing and managing resources</i> (43,52,75)        |
| 8  |               |                                                            |
| 9  |               | • Identify optimal strategies to mobilize and finance      |
| 10 |               | FRP interventions                                          |
| 11 |               | • Identify optimal strategies to manage resources          |
| 12 |               | once FRP interventions are funded                          |
| 13 |               | <i>Establishing cost-effectiveness</i> (19,39,57,75,85,86) |
| 14 |               |                                                            |
| 15 |               | • Estimate gains in utilization, FRP, experience of        |
| 16 |               | care, or health status relative to resource needs          |
| 17 |               | • Compare cost-effectiveness between FRP                   |
| 18 |               | interventions                                              |
| 19 |               |                                                            |

20 Abbreviations: catastrophic health expenditures, CHE; disability-adjusted life years, DALYs;  
 21 financial risk protection, FRP; impoverishing health expenditures, IHE; out-of-pocket  
 22 expenditures, OOPE; quality-adjusted life years, QALYs; universal health coverage, UHC  
 23  
 24  
 25  
 26  
 27  
 28  
 29  
 30  
 31  
 32  
 33  
 34  
 35  
 36  
 37  
 38  
 39  
 40  
 41  
 42  
 43  
 44  
 45  
 46  
 47  
 48  
 49  
 50  
 51  
 52  
 53  
 54  
 55  
 56  
 57  
 58  
 59  
 60

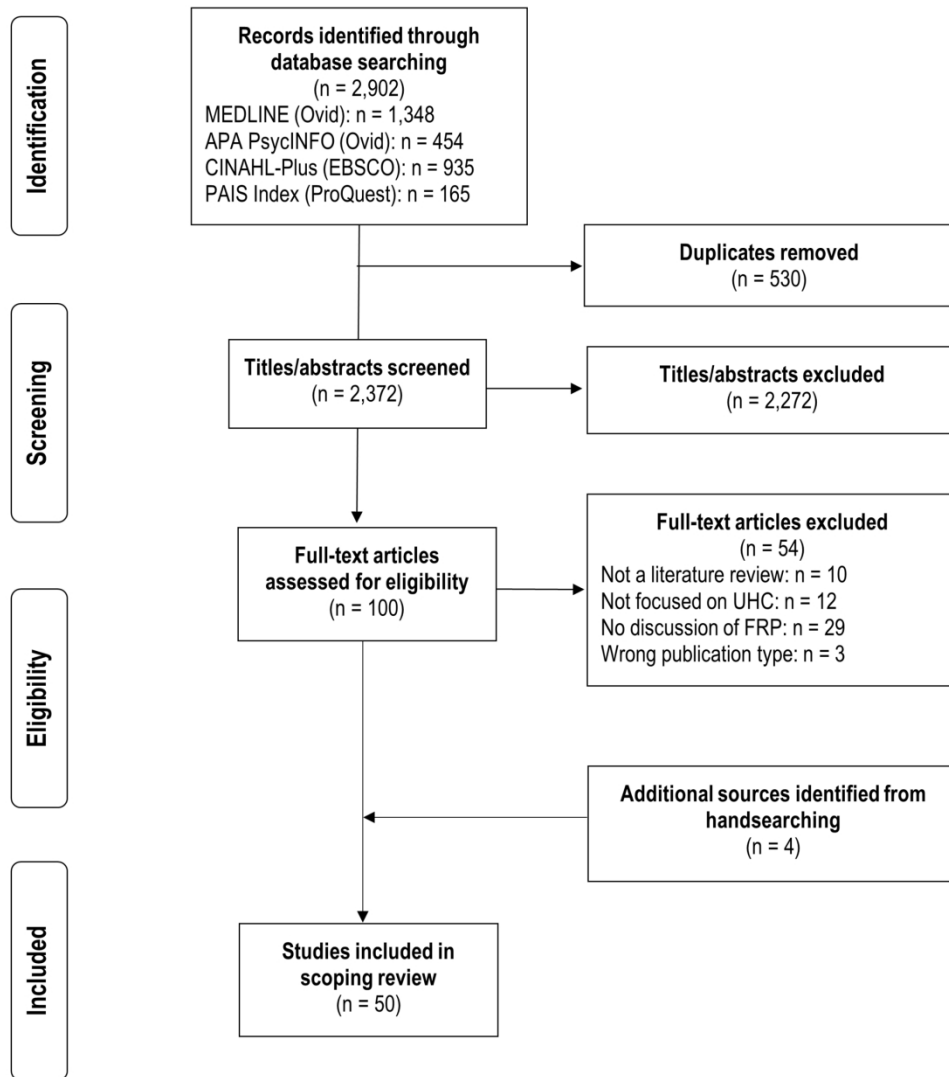

Figure 1. PRISMA study selection flowchart

184x207mm (300 x 300 DPI)

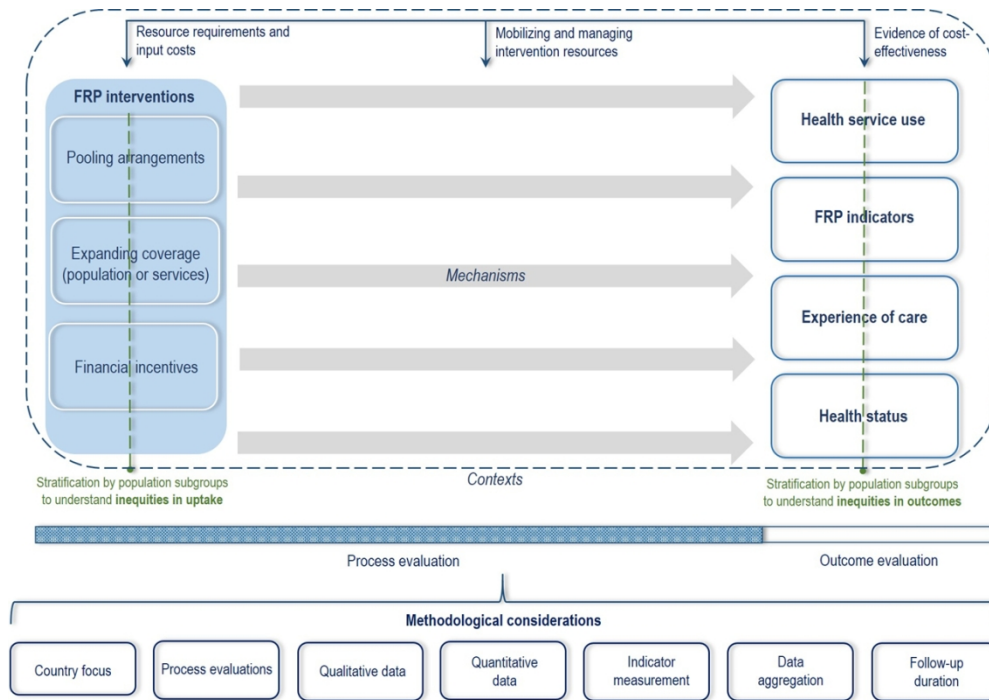

Figure 2. Concept map of financial risk protection interventions, impacts, evidence gaps, and methodological considerations

221x154mm (150 x 150 DPI)

1  
2  
3 **Supplementary material**  
4

5 **Identifying priorities for research on financial risk protection to achieve universal**  
6 **health coverage: A scoping overview of reviews**  
7

8  
9  
10 **Supplementary file 1.** Electronic database search strategy

11 **Supplementary file 2.** Detailed eligibility criteria for scoping overview of reviews  
12  
13  
14  
15  
16  
17  
18  
19  
20  
21  
22  
23  
24  
25  
26  
27  
28  
29  
30  
31  
32  
33  
34  
35  
36  
37  
38  
39  
40  
41  
42  
43  
44  
45  
46  
47  
48  
49  
50  
51  
52  
53  
54  
55  
56  
57  
58  
59  
60

For peer review only



**Supplementary file 1. Electronic database search strategy (last updated July 20, 2021)**

**Ovid MEDLINE (n = 1,348)**

| <b>Ovid MEDLINE: Epub Ahead of Print, In-Process &amp; Other Non-Indexed Citations, Ovid MEDLINE® Daily and Ovid MEDLINE® &lt;1946-Present&gt;</b> |                                                                                                                                                                                                                                                                                                                                                                                                                                                                                                                                                                                                                                                                                                                  |                  |
|----------------------------------------------------------------------------------------------------------------------------------------------------|------------------------------------------------------------------------------------------------------------------------------------------------------------------------------------------------------------------------------------------------------------------------------------------------------------------------------------------------------------------------------------------------------------------------------------------------------------------------------------------------------------------------------------------------------------------------------------------------------------------------------------------------------------------------------------------------------------------|------------------|
| <b>#</b>                                                                                                                                           | <b>Searches</b>                                                                                                                                                                                                                                                                                                                                                                                                                                                                                                                                                                                                                                                                                                  | <b># Results</b> |
| 1                                                                                                                                                  | exp Insurance Coverage/                                                                                                                                                                                                                                                                                                                                                                                                                                                                                                                                                                                                                                                                                          | 18088            |
| 2                                                                                                                                                  | (UHC or ((universal or population or public or national or essential or social) adj4 (coverage or benefit* or insurance or care or healthcare or health care or health-care or health servic* or medicin*))).tw,kf.                                                                                                                                                                                                                                                                                                                                                                                                                                                                                              | 192191           |
| 3                                                                                                                                                  | 1 or 2                                                                                                                                                                                                                                                                                                                                                                                                                                                                                                                                                                                                                                                                                                           | 205627           |
| 4                                                                                                                                                  | (financial adj3 (protection or risk or coverage or risk-sharing or hardship or assist* or barrier* or access)).tw,kf.                                                                                                                                                                                                                                                                                                                                                                                                                                                                                                                                                                                            | 7609             |
| 5                                                                                                                                                  | (financing adj3 (health or healthcare or health care or health-care or health service* or medicin*)).tw,kf.                                                                                                                                                                                                                                                                                                                                                                                                                                                                                                                                                                                                      | 5727             |
| 6                                                                                                                                                  | (cost-sharing or cost sharing or social health protection or social protection in health or social health promotion or reimbursement incentive* or monetary incentive* or cash transfer or cash transfers or cash grant or cash grants or monetary grant or monetary grants or non-monetary grant or non-monetary grants or non monetary grant or non monetary grants or social welfare or social assist* or social grant or social grants or social safety net or social safety-net or sociali?ed healthcare or sociali?ed health care or sociali?ed health-care or social security or health security or healthcare security or health care security or health-care security or public welfare servic*).tw,kf. | 21032            |
| 7                                                                                                                                                  | 4 or 5 or 6                                                                                                                                                                                                                                                                                                                                                                                                                                                                                                                                                                                                                                                                                                      | 33432            |
| 8                                                                                                                                                  | Vulnerable populations/ or exp Socioeconomic Factors/ or Healthcare Disparities/ or Health Status Disparities/ or Poverty Areas/ or Urban Population/ or "Social Determinants of Health"/                                                                                                                                                                                                                                                                                                                                                                                                                                                                                                                        | 548521           |
| 9                                                                                                                                                  | (health adj3 (gap or gaps or gradient* or hierarch*)).tw,kf.                                                                                                                                                                                                                                                                                                                                                                                                                                                                                                                                                                                                                                                     | 4294             |
| 10                                                                                                                                                 | (equit* or inequit* or inequalit* or disparit* or equality).tw,kf.                                                                                                                                                                                                                                                                                                                                                                                                                                                                                                                                                                                                                                               | 153269           |
| 11                                                                                                                                                 | ((social* or socio-economic or socioeconomic or economic or structural or material) adj3 (advantage* or disadvantage* or exclude* or exclusion or include* or inclusion or status or position or gradient* or hierarch* or class* or determinant* or vulnerab* or insecurit*)).tw,kf.                                                                                                                                                                                                                                                                                                                                                                                                                            | 145322           |
| 12                                                                                                                                                 | (SES or SEP or sociodemographic* or socio-demographic* or income or wealth* or poverty or educational level or level of education or educational attainment or well educated or better educated or unemploy* or home owner* or tenure or affluen* or well off or better off or worse off).tw,kf.                                                                                                                                                                                                                                                                                                                                                                                                                 | 335018           |
| 13                                                                                                                                                 | (poverty or precar* or impoverish* or depriv* or destitut* or marginalis* or marginaliz* or indigen* or low-income or low income).tw,kf.                                                                                                                                                                                                                                                                                                                                                                                                                                                                                                                                                                         | 214037           |
| 14                                                                                                                                                 | ((out-of-pocket or out of pocket or catastrophic) adj4 (spend* or expend* or cost* or expens* or payment*)).tw,kf.                                                                                                                                                                                                                                                                                                                                                                                                                                                                                                                                                                                               | 6509             |
| 15                                                                                                                                                 | 8 or 9 or 10 or 11 or 12 or 13 or 14                                                                                                                                                                                                                                                                                                                                                                                                                                                                                                                                                                                                                                                                             | 1045017          |
| 16                                                                                                                                                 | 3 and 7                                                                                                                                                                                                                                                                                                                                                                                                                                                                                                                                                                                                                                                                                                          | 7126             |
| 17                                                                                                                                                 | 3 and 15                                                                                                                                                                                                                                                                                                                                                                                                                                                                                                                                                                                                                                                                                                         | 48135            |
| 18                                                                                                                                                 | 16 or 17                                                                                                                                                                                                                                                                                                                                                                                                                                                                                                                                                                                                                                                                                                         | 51289            |
| 19                                                                                                                                                 | Meta-Analysis as Topic/                                                                                                                                                                                                                                                                                                                                                                                                                                                                                                                                                                                                                                                                                          | 20252            |

|    |                                                 |          |
|----|-------------------------------------------------|----------|
| 20 | meta analy\$.tw.                                | 209726   |
| 21 | metaanaly\$.tw.                                 | 2309     |
| 22 | Meta-Analysis/                                  | 141057   |
| 23 | (systematic adj (review\$1 or overview\$1)).tw. | 215867   |
| 24 | exp Review Literature as Topic/                 | 17597    |
| 25 | 19 or 20 or 21 or 22 or 23 or 24                | 360568   |
| 26 | cochrane.ab.                                    | 102470   |
| 27 | cochrane.ab.                                    | 102470   |
| 28 | (psychlit or psyclit).ab.                       | 915      |
| 29 | (psychinfo or psycinfo).ab.                     | 44220    |
| 30 | (cinahl or cinhal).ab.                          | 34735    |
| 31 | science citation index.ab.                      | 3359     |
| 32 | bids.ab.                                        | 576      |
| 33 | cancerlit.ab.                                   | 635      |
| 34 | 26 or 27 or 28 or 29 or 30 or 31 or 32 or 33    | 149833   |
| 35 | reference list\$.ab.                            | 19743    |
| 36 | bibliograph\$.ab.                               | 19851    |
| 37 | hand-search\$.ab.                               | 7592     |
| 38 | relevant journals.ab.                           | 1253     |
| 39 | manual search\$.ab.                             | 5024     |
| 40 | 35 or 36 or 37 or 38 or 39                      | 47958    |
| 41 | selection criteria.ab.                          | 32644    |
| 42 | data extraction.ab.                             | 25296    |
| 43 | 41 or 42                                        | 55488    |
| 44 | Review/                                         | 2855357  |
| 45 | 43 and 44                                       | 30460    |
| 46 | Comment/                                        | 926722   |
| 47 | Letter/                                         | 1150406  |
| 48 | Editorial/                                      | 579399   |
| 49 | animal/                                         | 6910459  |
| 50 | human/                                          | 19655862 |
| 51 | 49 not (49 and 50)                              | 4848355  |
| 52 | 46 or 47 or 48 or 51                            | 6770006  |
| 53 | 25 or 34 or 40 or 45                            | 426013   |
| 54 | 53 not 52                                       | 404619   |
| 55 | 18 and 54                                       | 1399     |
| 56 | limit 55 to (english or french)                 | 1370     |
| 57 | limit 56 to dt=19950101-20210720                | 1348     |

Ovid APA PsycINFO (n = 454)

| APA PsycInfo <1806 to August Week 5 2021> |                                                                                                                                                                                                                                                                                                                                                                                                                                                                                                                                                                                                                                                                                                                  |           |
|-------------------------------------------|------------------------------------------------------------------------------------------------------------------------------------------------------------------------------------------------------------------------------------------------------------------------------------------------------------------------------------------------------------------------------------------------------------------------------------------------------------------------------------------------------------------------------------------------------------------------------------------------------------------------------------------------------------------------------------------------------------------|-----------|
| #                                         | Searches                                                                                                                                                                                                                                                                                                                                                                                                                                                                                                                                                                                                                                                                                                         | # Results |
| 1                                         | Health Care Reform/ or Global Health/                                                                                                                                                                                                                                                                                                                                                                                                                                                                                                                                                                                                                                                                            | 4912      |
| 2                                         | health insurance/ or exp employee health insurance/ or "underinsured (health insurance)"/ or "uninsured (health insurance)"/                                                                                                                                                                                                                                                                                                                                                                                                                                                                                                                                                                                     | 6044      |
| 3                                         | (UHC or ((universal or population or public or national or essential or social) adj4 (coverage or benefit* or insurance or care or healthcare or health care or health-care or health servic* or medicin*))).ti,ab.                                                                                                                                                                                                                                                                                                                                                                                                                                                                                              | 50112     |
| 4                                         | 1 or 2 or 3                                                                                                                                                                                                                                                                                                                                                                                                                                                                                                                                                                                                                                                                                                      | 58615     |
| 5                                         | (financial adj3 (protection or risk or coverage or risk-sharing or hardship or assist* or barrier* or access)).ti,ab.                                                                                                                                                                                                                                                                                                                                                                                                                                                                                                                                                                                            | 3467      |
| 6                                         | (financing adj3 (health or healthcare or health care or health-care or health service* or medicin*)).ti,ab.                                                                                                                                                                                                                                                                                                                                                                                                                                                                                                                                                                                                      | 693       |
| 7                                         | (cost-sharing or cost sharing or social health protection or social protection in health or social health promotion or reimbursement incentive* or monetary incentive* or cash transfer or cash transfers or cash grant or cash grants or monetary grant or monetary grants or non-monetary grant or non-monetary grants or non monetary grant or non monetary grants or social welfare or social assist* or social grant or social grants or social safety net or social safety-net or sociali?ed healthcare or sociali?ed health care or sociali?ed health-care or social security or health security or healthcare security or health care security or health-care security or public welfare servic*).ti,ab. | 8625      |
| 8                                         | 5 or 6 or 7                                                                                                                                                                                                                                                                                                                                                                                                                                                                                                                                                                                                                                                                                                      | 12656     |
| 9                                         | health disparities/                                                                                                                                                                                                                                                                                                                                                                                                                                                                                                                                                                                                                                                                                              | 9049      |
| 10                                        | exp Socioeconomic Status/                                                                                                                                                                                                                                                                                                                                                                                                                                                                                                                                                                                                                                                                                        | 60784     |
| 11                                        | health disparities/                                                                                                                                                                                                                                                                                                                                                                                                                                                                                                                                                                                                                                                                                              | 9049      |
| 12                                        | poverty/ or disadvantaged/ or lower income status/ or poverty areas/                                                                                                                                                                                                                                                                                                                                                                                                                                                                                                                                                                                                                                             | 18173     |
| 13                                        | "Equity (Social)"/ or "Equity (Payment)"/                                                                                                                                                                                                                                                                                                                                                                                                                                                                                                                                                                                                                                                                        | 3162      |
| 14                                        | (health adj3 (gap or gaps or gradient* or hierarch*)).ti,ab.                                                                                                                                                                                                                                                                                                                                                                                                                                                                                                                                                                                                                                                     | 1830      |
| 15                                        | (equit* or inequit* or inequalit* or disparit* or equality).ti,ab.                                                                                                                                                                                                                                                                                                                                                                                                                                                                                                                                                                                                                                               | 84511     |
| 16                                        | ((social* or socio-economic or socioeconomic or economic or structural or material) adj3 (advantage* or disadvantage* or exclude* or exclusion or include* or inclusion or status or position or gradient* or hierarch* or class* or determinant* or vulnerab* or insecurit*)).ti,ab.                                                                                                                                                                                                                                                                                                                                                                                                                            | 97625     |
| 17                                        | (SES or SEP or sociodemographic* or socio-demographic* or income or wealth* or poverty or educational level or level of education or educational attainment or well educated or better educated or unemploy* or home owner* or tenure or affluen* or well off or better off or worse off).ti,ab.                                                                                                                                                                                                                                                                                                                                                                                                                 | 189818    |
| 18                                        | (poverty or precar* or impoverish* or depriv* or destitut* or marginalis* or marginaliz* or indigen* or low-income or low income).ti,ab.                                                                                                                                                                                                                                                                                                                                                                                                                                                                                                                                                                         | 108472    |
| 19                                        | ((out-of-pocket or out of pocket or catastrophic) adj4 (spend* or expend* or cost* or expens* or payment*)).ti,ab.                                                                                                                                                                                                                                                                                                                                                                                                                                                                                                                                                                                               | 977       |
| 20                                        | 9 or 10 or 11 or 12 or 13 or 14 or 15 or 16 or 17 or 18 or 19                                                                                                                                                                                                                                                                                                                                                                                                                                                                                                                                                                                                                                                    | 400615    |
| 21                                        | 4 and 8                                                                                                                                                                                                                                                                                                                                                                                                                                                                                                                                                                                                                                                                                                          | 2166      |

|    |                                                                                                                                                                                                                                                                                                                                                                                                                                                                                                                     |        |
|----|---------------------------------------------------------------------------------------------------------------------------------------------------------------------------------------------------------------------------------------------------------------------------------------------------------------------------------------------------------------------------------------------------------------------------------------------------------------------------------------------------------------------|--------|
| 22 | 4 and 20                                                                                                                                                                                                                                                                                                                                                                                                                                                                                                            | 13418  |
| 23 | 21 or 22                                                                                                                                                                                                                                                                                                                                                                                                                                                                                                            | 14597  |
| 24 | (((comprehensive* or integrative or systematic*) adj3 (bibliographic* or review* or literature)) or (meta-analy* or metaanaly* or "research synthesis" or ((information or data) adj3 synthesis) or (data adj2 extract*))).ti,ab,id. or ((review adj5 (rationale or evidence)).ti,ab,id. and "Literature Review".md.) or (cinahl or (cochrane adj3 trial*) or embase or medline or psyclit or pubmed or scopus or "sociological abstracts" or "web of science").ab. or ("systematic review" or "meta analysis").md. | 105124 |
| 25 | 23 and 24                                                                                                                                                                                                                                                                                                                                                                                                                                                                                                           | 504    |
| 26 | limit 25 to up=19950101-20210720                                                                                                                                                                                                                                                                                                                                                                                                                                                                                    | 486    |
| 27 | limit 26 to (english or french)                                                                                                                                                                                                                                                                                                                                                                                                                                                                                     | 454    |

### EBSCO CINAHL-Plus (n = 935)

| EBSCO CINAHL Plus with Full Text |                                                                                                                                                                                                                                                                                                                                                                                                                                                                                                                                                                                                                                                                                                                                                                                                                                                                                                 |           |
|----------------------------------|-------------------------------------------------------------------------------------------------------------------------------------------------------------------------------------------------------------------------------------------------------------------------------------------------------------------------------------------------------------------------------------------------------------------------------------------------------------------------------------------------------------------------------------------------------------------------------------------------------------------------------------------------------------------------------------------------------------------------------------------------------------------------------------------------------------------------------------------------------------------------------------------------|-----------|
| #                                | Searches                                                                                                                                                                                                                                                                                                                                                                                                                                                                                                                                                                                                                                                                                                                                                                                                                                                                                        | # Results |
| S21                              | S14 AND S20<br>Limiters - Published Date: 19950101-20210731; Exclude MEDLINE records; Language: English, French                                                                                                                                                                                                                                                                                                                                                                                                                                                                                                                                                                                                                                                                                                                                                                                 | 935       |
| S20                              | S18 OR S19                                                                                                                                                                                                                                                                                                                                                                                                                                                                                                                                                                                                                                                                                                                                                                                                                                                                                      | 50,552    |
| S19                              | S15 AND S17                                                                                                                                                                                                                                                                                                                                                                                                                                                                                                                                                                                                                                                                                                                                                                                                                                                                                     | 47,638    |
| S18                              | S15 AND S16                                                                                                                                                                                                                                                                                                                                                                                                                                                                                                                                                                                                                                                                                                                                                                                                                                                                                     | 5,991     |
| S17                              | S6 OR S7 OR S8 OR S9 OR S10 OR S11 OR S12 OR S13                                                                                                                                                                                                                                                                                                                                                                                                                                                                                                                                                                                                                                                                                                                                                                                                                                                | 559,599   |
| S16                              | S3 OR S4 OR S5                                                                                                                                                                                                                                                                                                                                                                                                                                                                                                                                                                                                                                                                                                                                                                                                                                                                                  | 14,448    |
| S15                              | S1 OR S2                                                                                                                                                                                                                                                                                                                                                                                                                                                                                                                                                                                                                                                                                                                                                                                                                                                                                        | 232,140   |
| S14                              | (TI (systematic* n3 review*)) or (AB (systematic* n3 review*)) or (TI (systematic* n3 bibliographic*)) or (AB (systematic* n3 bibliographic*)) or (TI (systematic* n3 literature)) or (AB (systematic* n3 literature)) or (TI (comprehensive* n3 literature)) or (AB (comprehensive* n3 literature)) or (TI (comprehensive* n3 bibliographic*)) or (AB (comprehensive* n3 bibliographic*)) or (TI (integrative n3 review)) or (AB (integrative n3 review)) or (JN "Cochrane Database of Systematic Reviews") or (TI (information n2 synthesis)) or (TI (data n2 synthesis)) or (AB (information n2 synthesis)) or (AB (data n2 synthesis)) or (TI (data n2 extract*)) or (AB (data n2 extract*)) or (TI (medline or pubmed or psyclit or cinahl or (psycinfo not "psycinfo database") or "web of science" or scopus or embase)) or (AB (medline or pubmed or psyclit or cinahl or (psycinfo not | 231,631   |

|     |                                                                                                                                                                                                                                                                                                                                                                                                                                                                                                                                                                                                                                                                                                                                                                                                                                                                                                                                                                                                                                                                                                                                                                                                                                                                                                                                           |         |
|-----|-------------------------------------------------------------------------------------------------------------------------------------------------------------------------------------------------------------------------------------------------------------------------------------------------------------------------------------------------------------------------------------------------------------------------------------------------------------------------------------------------------------------------------------------------------------------------------------------------------------------------------------------------------------------------------------------------------------------------------------------------------------------------------------------------------------------------------------------------------------------------------------------------------------------------------------------------------------------------------------------------------------------------------------------------------------------------------------------------------------------------------------------------------------------------------------------------------------------------------------------------------------------------------------------------------------------------------------------|---------|
|     | “psycinfo database”) or “web of science” or scopus or embase)) or (MH “Systematic Review”) or (MH “Meta Analysis”) or (TI (meta-analy* or metaanaly*)) or (AB (meta-analy* or metaanaly*))                                                                                                                                                                                                                                                                                                                                                                                                                                                                                                                                                                                                                                                                                                                                                                                                                                                                                                                                                                                                                                                                                                                                                |         |
| S13 | TI((out-of-pocket or out of pocket or catastrophic) N4 (spend* or expend* or cost* or expens* or payment*)) or AB((out-of-pocket or out of pocket or catastrophic) N4 (spend* or expend* or cost* or expens* or payment*))                                                                                                                                                                                                                                                                                                                                                                                                                                                                                                                                                                                                                                                                                                                                                                                                                                                                                                                                                                                                                                                                                                                | 3,485   |
| S12 | TI(poverty or precar* or impoverish* or depriv* or destitut* or marginalis* or marginaliz* or indigen* or low-income or low income) or AB(poverty or precar* or impoverish* or depriv* or destitut* or marginalis* or marginaliz* or indigen* or low-income or low income)                                                                                                                                                                                                                                                                                                                                                                                                                                                                                                                                                                                                                                                                                                                                                                                                                                                                                                                                                                                                                                                                | 68,496  |
| S11 | TI((SES or SEP or sociodemographic* or socio-demographic* or income or wealth* or poverty or educational level or level of education or educational attainment or well educated or better educated or unemploy* or home owner* or tenure or affluen* or well off or better off or worse off) or AB((SES or SEP or sociodemographic* or socio-demographic* or income or wealth* or poverty or educational level or level of education or educational attainment or well educated or better educated or unemploy* or home owner* or tenure or affluen* or well off or better off or worse off)                                                                                                                                                                                                                                                                                                                                                                                                                                                                                                                                                                                                                                                                                                                                              | 151,541 |
| S10 | TI((social* or socio-economic or socioeconomic or economic or structural or material) N3 (advantage* or disadvantage* or exclude* or exclusion or include* or inclusion or status or position or gradient* or hierarch* or class* or determinant* or vulnerab* or insecurit*)) or AB((social* or socio-economic or socioeconomic or economic or structural or material) N3 (advantage* or disadvantage* or exclude* or exclusion or include* or inclusion or status or position or gradient* or hierarch* or class* or determinant* or vulnerab* or insecurit*))                                                                                                                                                                                                                                                                                                                                                                                                                                                                                                                                                                                                                                                                                                                                                                          | 62,2760 |
| S9  | TI(equit* or inequit* or inequalit* or disparit* or equality) or AB(equit* or inequit* or inequalit* or disparit* or equality)                                                                                                                                                                                                                                                                                                                                                                                                                                                                                                                                                                                                                                                                                                                                                                                                                                                                                                                                                                                                                                                                                                                                                                                                            | 71,667  |
| S8  | TI(health N3 (gap or gaps or gradient* or hierarch*)) or AB(health N3 (gap or gaps or gradient* or hierarch*))                                                                                                                                                                                                                                                                                                                                                                                                                                                                                                                                                                                                                                                                                                                                                                                                                                                                                                                                                                                                                                                                                                                                                                                                                            | 3,571   |
| S7  | (MH "Health Status Disparities") OR (MH "Social Determinants of Health") OR (MH "Healthcare Disparities")                                                                                                                                                                                                                                                                                                                                                                                                                                                                                                                                                                                                                                                                                                                                                                                                                                                                                                                                                                                                                                                                                                                                                                                                                                 | 27,070  |
| S6  | (MH "Socioeconomic Factors+")                                                                                                                                                                                                                                                                                                                                                                                                                                                                                                                                                                                                                                                                                                                                                                                                                                                                                                                                                                                                                                                                                                                                                                                                                                                                                                             | 370,443 |
| S5  | TI(cost-sharing or cost sharing or social health protection or social protection in health or social health promotion or reimbursement incentive* or monetary incentive* or cash transfer or cash transfers or cash grant or cash grants or monetary grant or monetary grants or non-monetary grant or non-monetary grants or non monetary grant or non monetary grants or social welfare or social assist* or social grant or social grants or social safety net or social safety-net or sociali#ed healthcare or sociali#ed health care or sociali#ed health-care or social security or health security or healthcare security or health care security or health-care security or public welfare servic*) or AB(cost-sharing or cost sharing or social health protection or social protection in health or social health promotion or reimbursement incentive* or monetary incentive* or cash transfer or cash transfers or cash grants or cash grants or non-monetary grant or non-monetary grants or social welfare or social assist* or social grant or social grants or social safety net or social safety-net or sociali#ed healthcare or sociali#ed health care or sociali#ed health-care or social security or health security or healthcare security or health care security or health-care security or public welfare servic*) | 7,688   |

|    |                                                                                                                                                                                                                                                                                                                                                                                                                              |         |
|----|------------------------------------------------------------------------------------------------------------------------------------------------------------------------------------------------------------------------------------------------------------------------------------------------------------------------------------------------------------------------------------------------------------------------------|---------|
| S4 | TI(financing N3 (health or healthcare or health care or health-care or health service* or medicin*)) or AB(financing N3 (health or healthcare or health care or health-care or health service* or medicin*))                                                                                                                                                                                                                 | 2,168   |
| S3 | TI(financial N3 (protection or risk or coverage or risk-sharing or hardship or assist* or barrier* or access)) or AB(financial N3 (protection or risk or coverage or risk-sharing or hardship or assist* or barrier* or access))                                                                                                                                                                                             | 4,954   |
| S2 | TI(UHC or ((universal or population or public or national or essential or social) N4 (coverage or benefit* or insurance or care or healthcare or health care or health-care or health servic* or medicin*))) or AB(UHC or ((universal or population or public or national or essential or social) N4 (coverage or benefit* or insurance or care or healthcare or health care or health-care or health servic* or medicin*))) | 118,296 |
| S1 | (MH "Insurance+")                                                                                                                                                                                                                                                                                                                                                                                                            | 123,553 |

### ProQuest PAIS Index (n = 165)

| Search                                                                                                                                                                                                                                                                                                                                                                                                                                                                                                                                                                                                                                                                                                                                                                                                                                                                                                                                                                                                                                                                                                                                                                                                                                                                                                                                                                                                                                                                                                                                                                                                                                                                                                                                                                                                                                                                                                                                                                                                                                                                                                                                                                                                                                                                                                                                                                                                                                                                                                                                                                                                                                                                                                                                                                              | Results |
|-------------------------------------------------------------------------------------------------------------------------------------------------------------------------------------------------------------------------------------------------------------------------------------------------------------------------------------------------------------------------------------------------------------------------------------------------------------------------------------------------------------------------------------------------------------------------------------------------------------------------------------------------------------------------------------------------------------------------------------------------------------------------------------------------------------------------------------------------------------------------------------------------------------------------------------------------------------------------------------------------------------------------------------------------------------------------------------------------------------------------------------------------------------------------------------------------------------------------------------------------------------------------------------------------------------------------------------------------------------------------------------------------------------------------------------------------------------------------------------------------------------------------------------------------------------------------------------------------------------------------------------------------------------------------------------------------------------------------------------------------------------------------------------------------------------------------------------------------------------------------------------------------------------------------------------------------------------------------------------------------------------------------------------------------------------------------------------------------------------------------------------------------------------------------------------------------------------------------------------------------------------------------------------------------------------------------------------------------------------------------------------------------------------------------------------------------------------------------------------------------------------------------------------------------------------------------------------------------------------------------------------------------------------------------------------------------------------------------------------------------------------------------------------|---------|
| ti,ab((((UHC or ((universal or population or public or national or essential or social) NEAR/4 (coverage or benefit* or insurance or care or healthcare or "health care" or health-care or "health service" or "health services" or medicin*)) AND ((financial NEAR/3 (protection or risk or coverage or risk-sharing or hardship or assist* or barrier* or access)) OR (financing NEAR/3 (health or healthcare or "health care" or health-care or "health service" or "health services" or medicin*)) OR (cost-sharing or "cost sharing" or "social health protection" or "social protection in health" or "social health promotion" or "reimbursement incentive" or "reimbursement incentives" or "monetary incentive" or "monetary incentives" or "cash transfer" or "cash transfers" or "cash grant" or "cash grants" or "monetary grant" or "monetary grants" or "non-monetary grant" or "non-monetary grants" or "non monetary grant" or "non monetary grants" or "social welfare" or "social assistance" or "social grant" or "social grants" or "social safety net" or "social safety-net" or "socialized healthcare" or "socialised healthcare" or "socialized health care" or "socialised health care" or "socialized health-care" or "socialised health-care" or "social security" or "health security" or "healthcare security" or "health care security" or "health-care security" or "public welfare")))) OR ((UHC or ((universal or population or public or national or essential or social) NEAR/4 (coverage or benefit* or insurance or care or healthcare or "health care" or health-care or "health service" or "health services" or medicin*)) AND ((health NEAR/3 (gap or gaps or gradient* or hierarch*)) OR (equit* or inequit* or inequalit* or disparit* or equality) OR ((social* or socio-economic or socioeconomic or economic or structural or material) NEAR/3 (advantage* or disadvantage* or exclude* or exclusion or include* or inclusion or status or position or gradient* or hierarch* or class* or determinant* or vulnerab* or insecurit*)) OR (SES or SEP or sociodemographic* or socio-demographic* or income or wealth* or poverty or "educational level" or "level of education" or "educational attainment" or "well educated" or "well-education" or "better educated" or "better-educated" or unemploy* or homeowner or "home-owner" or "home owner" or homeowners or "home-owners" or "home owners" or tenure or affluen* or "well off" or "well-off" or "better off" or "better-off" or "worse off" or "worse-off") OR (poverty or precar* or impoverish* or depriv* or destitut* or marginalis* or marginaliz* or indigen* or low-income or "low income") OR ((out-of-pocket or "out of pocket" or catastrophic) NEAR/4 (spend* or | 165     |

1  
2  
3  
4  
5  
6  
7  
8  
9  
10  
11  
12  
13  
14  
15  
16  
17  
18  
19  
20  
21  
22  
23  
24  
25  
26  
27  
28  
29  
30  
31  
32  
33  
34  
35  
36  
37  
38  
39  
40  
41  
42  
43  
44  
45  
46  
47

|                                                                                                                                                                                                                                                                                                                                                                                                                                                                                                                                                                                                                                                                                                                                                                   |  |
|-------------------------------------------------------------------------------------------------------------------------------------------------------------------------------------------------------------------------------------------------------------------------------------------------------------------------------------------------------------------------------------------------------------------------------------------------------------------------------------------------------------------------------------------------------------------------------------------------------------------------------------------------------------------------------------------------------------------------------------------------------------------|--|
| <p>expend* or cost* or expens* or payment*)))) AND (((comprehensive* or integrative or systematic* or realist or scoping or rapid or narrative) NEAR/3 (bibliographic* or review* or literature)) OR (meta-analy* or metaanaly* or "meta analysis" or "meta analyse" or "meta analyze" "meta analysed" or "meta analyzed" or "meta analyzing" or "meta analysing" or "research synthesis") OR ((information or data) NEAR/3 synthesis) OR (data NEAR/2 extract*) OR (review NEAR/5 (rationale OR evidence)) OR (cinahl or cinhal or cochrane or embase or medline or psyclit or psychlit or pubmed or scopus or "sociological abstracts" or "web of science"))</p> <p>Limit dates: 1995-01-01 to 2021-07-20</p> <p>Limit language: English (no French option)</p> |  |
|-------------------------------------------------------------------------------------------------------------------------------------------------------------------------------------------------------------------------------------------------------------------------------------------------------------------------------------------------------------------------------------------------------------------------------------------------------------------------------------------------------------------------------------------------------------------------------------------------------------------------------------------------------------------------------------------------------------------------------------------------------------------|--|

For peer review only

**Supplementary file 2.** Detailed eligibility criteria for scoping overview of reviews

| <b>Criterion</b>                         | <b>Definition for inclusion</b>                                                                                                                                                                                                                                                                                                                                                                                                                   | <b>Definition for exclusion</b>                                                                                                                                                                                                                                       |
|------------------------------------------|---------------------------------------------------------------------------------------------------------------------------------------------------------------------------------------------------------------------------------------------------------------------------------------------------------------------------------------------------------------------------------------------------------------------------------------------------|-----------------------------------------------------------------------------------------------------------------------------------------------------------------------------------------------------------------------------------------------------------------------|
| Research design                          | <p>Study methodology is a literature review (e.g., narrative, systematic, scoping, rapid, comparative, or realist reviews, including syntheses of quantitative, qualitative, or mixed methods data).</p> <p>Reviews could be combined with other methodologies (e.g., Delphi panel, survey, stakeholder interviews).</p> <p>An explicit 'Methods' section that confirms that a literature and/or document review was undertaken is available.</p> | <p>Study designs other than literature reviews.</p> <p>Studies where the methodology is unclear or not provided.</p>                                                                                                                                                  |
| Focus on universal health coverage (UHC) | <p>Study is focused on UHC, where UHC is of central interest to the article.</p> <p>UHC may be described using different terms denoting universality (e.g., universal coverage, insurance, or care).</p>                                                                                                                                                                                                                                          | <p>Study does not discuss UHC.</p> <p>Study incidentally mentions UHC, but it is not the focus of the article.</p>                                                                                                                                                    |
| Focus on financial risk protection       | <p>Study focuses on the achievement of UHC through FRP, where FRP is discussed in detail (e.g., as a concept, measure, or intervention).</p> <p>FRP is discussed in relation to the protection of health system users from financial hardship.</p>                                                                                                                                                                                                | <p>Study does not discuss FRP.</p> <p>Study incidentally mentions FRP, but it is not discussed in detail (e.g., as a concept, measure, or intervention).</p> <p>Study incidentally mentions FRP, but it is not discussed in the context of/as a dimension of UHC.</p> |
| Language                                 | Study is written in English or French.                                                                                                                                                                                                                                                                                                                                                                                                            | Studies in any language other than English or French.                                                                                                                                                                                                                 |
| Time frame                               | Study is published in or after 1995.                                                                                                                                                                                                                                                                                                                                                                                                              | Any studies published before 1995.                                                                                                                                                                                                                                    |
| Type of publication                      | Study is an original published work that has undergone peer-review.                                                                                                                                                                                                                                                                                                                                                                               | Conference abstracts, posters, editorials, thesis dissertations, technical reports, or books/book chapters.                                                                                                                                                           |
| Availability                             | Full text is accessible through the University of Toronto library services                                                                                                                                                                                                                                                                                                                                                                        |                                                                                                                                                                                                                                                                       |



## Checklist. Preferred Reporting Items for Systematic reviews and Meta-Analyses extension for Scoping Reviews (PRISMA-ScR) reporting checklist

| SECTION                                               | ITEM | PRISMA-ScR CHECKLIST ITEM                                                                                                                                                                                                                                                                                  | REPORTED ON PAGE # |
|-------------------------------------------------------|------|------------------------------------------------------------------------------------------------------------------------------------------------------------------------------------------------------------------------------------------------------------------------------------------------------------|--------------------|
| <b>TITLE</b>                                          |      |                                                                                                                                                                                                                                                                                                            |                    |
| Title                                                 | 1    | Identify the report as a scoping review.                                                                                                                                                                                                                                                                   | 1                  |
| <b>ABSTRACT</b>                                       |      |                                                                                                                                                                                                                                                                                                            |                    |
| Structured summary                                    | 2    | Provide a structured summary that includes (as applicable): background, objectives, eligibility criteria, sources of evidence, charting methods, results, and conclusions that relate to the review questions and objectives.                                                                              | 2                  |
| <b>INTRODUCTION</b>                                   |      |                                                                                                                                                                                                                                                                                                            |                    |
| Rationale                                             | 3    | Describe the rationale for the review in the context of what is already known. Explain why the review questions/objectives lend themselves to a scoping review approach.                                                                                                                                   | 4                  |
| Objectives                                            | 4    | Provide an explicit statement of the questions and objectives being addressed with reference to their key elements (e.g., population or participants, concepts, and context) or other relevant key elements used to conceptualize the review questions and/or objectives.                                  | 4                  |
| <b>METHODS</b>                                        |      |                                                                                                                                                                                                                                                                                                            |                    |
| Protocol and registration                             | 5    | Indicate whether a review protocol exists; state if and where it can be accessed (e.g., a Web address); and if available, provide registration information, including the registration number.                                                                                                             | 6                  |
| Eligibility criteria                                  | 6    | Specify characteristics of the sources of evidence used as eligibility criteria (e.g., years considered, language, and publication status), and provide a rationale.                                                                                                                                       | 7, Suppl. 2        |
| Information sources*                                  | 7    | Describe all information sources in the search (e.g., databases with dates of coverage and contact with authors to identify additional sources), as well as the date the most recent search was executed.                                                                                                  | 6                  |
| Search                                                | 8    | Present the full electronic search strategy for at least 1 database, including any limits used, such that it could be repeated.                                                                                                                                                                            | 6, Suppl. 1        |
| Selection of sources of evidence†                     | 9    | State the process for selecting sources of evidence (i.e., screening and eligibility) included in the scoping review.                                                                                                                                                                                      | 7, Suppl. 2        |
| Data charting process‡                                | 10   | Describe the methods of charting data from the included sources of evidence (e.g., calibrated forms or forms that have been tested by the team before their use, and whether data charting was done independently or in duplicate) and any processes for obtaining and confirming data from investigators. | 7, 8               |
| Data items                                            | 11   | List and define all variables for which data were sought and any assumptions and simplifications made.                                                                                                                                                                                                     | 7                  |
| Critical appraisal of individual sources of evidence§ | 12   | If done, provide a rationale for conducting a critical appraisal of included sources of evidence; describe the methods used and how this information was used in any data synthesis (if appropriate).                                                                                                      | NA                 |

| SECTION                                       | ITEM | PRISMA-ScR CHECKLIST ITEM                                                                                                                                                                       | REPORTED ON PAGE # |
|-----------------------------------------------|------|-------------------------------------------------------------------------------------------------------------------------------------------------------------------------------------------------|--------------------|
| Synthesis of results                          | 13   | Describe the methods of handling and summarizing the data that were charted.                                                                                                                    | 7, 8               |
| <b>RESULTS</b>                                |      |                                                                                                                                                                                                 |                    |
| Selection of sources of evidence              | 14   | Give numbers of sources of evidence screened, assessed for eligibility, and included in the review, with reasons for exclusions at each stage, ideally using a flow diagram.                    | 8, Fig. 1          |
| Characteristics of sources of evidence        | 15   | For each source of evidence, present characteristics for which data were charted and provide the citations.                                                                                     | 8, Tables 1-2      |
| Critical appraisal within sources of evidence | 16   | If done, present data on critical appraisal of included sources of evidence (see item 12).                                                                                                      | NA                 |
| Results of individual sources of evidence     | 17   | For each included source of evidence, present the relevant data that were charted that relate to the review questions and objectives.                                                           | Table 1-3          |
| Synthesis of results                          | 18   | Summarize and/or present the charting results as they relate to the review questions and objectives.                                                                                            | 9-19, Tables 1-3   |
| <b>DISCUSSION</b>                             |      |                                                                                                                                                                                                 |                    |
| Summary of evidence                           | 19   | Summarize the main results (including an overview of concepts, themes, and types of evidence available), link to the review questions and objectives, and consider the relevance to key groups. | 19, 20             |
| Limitations                                   | 20   | Discuss the limitations of the scoping review process.                                                                                                                                          | 21, 22             |
| Conclusions                                   | 21   | Provide a general interpretation of the results with respect to the review questions and objectives, as well as potential implications and/or next steps.                                       | 22                 |
| <b>FUNDING</b>                                |      |                                                                                                                                                                                                 |                    |
| Funding                                       | 22   | Describe sources of funding for the included sources of evidence, as well as sources of funding for the scoping review. Describe the role of the funders of the scoping review.                 | 23                 |

JB1 = Joanna Briggs Institute; PRISMA-ScR = Preferred Reporting Items for Systematic reviews and Meta-Analyses extension for Scoping Reviews.

\* Where *sources of evidence* (see second footnote) are compiled from, such as bibliographic databases, social media platforms, and Web sites.

† A more inclusive/heterogeneous term used to account for the different types of evidence or data sources (e.g., quantitative and/or qualitative research, expert opinion, and policy documents) that may be eligible in a scoping review as opposed to only studies. This is not to be confused with *information sources* (see first footnote).

‡ The frameworks by Arksey and O'Malley (6) and Levac and colleagues (7) and the JBI guidance (4, 5) refer to the process of data extraction in a scoping review as data charting.

§ The process of systematically examining research evidence to assess its validity, results, and relevance before using it to inform a decision. This term is used for items 12 and 19 instead of "risk of bias" (which is more applicable to systematic reviews of interventions) to include and acknowledge the various sources of evidence that may be used in a scoping review (e.g., quantitative and/or qualitative research, expert opinion, and policy document).

From: Tricco AC, Lillie E, Zarin W, O'Brien KK, Colquhoun H, Levac D, et al. PRISMA Extension for Scoping Reviews (PRISMA-ScR): Checklist and Explanation. *Ann Intern Med*. 2018;169:467–473. doi: 10.7326/M18-0850.
