# Supplementary material for: Identifying priorities for research on financial risk protection to achieve universal health coverage: a scoping overview of reviews
Source: PubMed Central journal article supplement — BMJ Open. 2022 Mar 9;12(3):e052041. doi: 10.1136/bmjopen-2021-052041 (PMC8915291; doi:10.1136/bmjopen-2021-052041), 2022-03-09
Supplement: bmjopen-2021-052041supp001.pdf [file bmjopen-2021-052041supp001.pdf]

## **Supplementary material**

### **Identifying priorities for research on financial risk protection to achieve universal health coverage: A scoping overview of reviews**

**Supplementary file 1.** Electronic database search strategy

**Supplementary file 2.** Detailed eligibility criteria for scoping overview of reviews

**Supplementary file 1.** Electronic database search strategy (last updated July 20, 2021)**Ovid MEDLINE (n = 1,348)**

| <b>Ovid MEDLINE: Epub Ahead of Print, In-Process &amp; Other Non-Indexed Citations, Ovid MEDLINE® Daily and Ovid MEDLINE® &lt;1946-Present&gt;</b> |                                                                                                                                                                                                                                                                                                                                                                                                                                                                                                                                                                                                                                                                                                                  |                  |
|----------------------------------------------------------------------------------------------------------------------------------------------------|------------------------------------------------------------------------------------------------------------------------------------------------------------------------------------------------------------------------------------------------------------------------------------------------------------------------------------------------------------------------------------------------------------------------------------------------------------------------------------------------------------------------------------------------------------------------------------------------------------------------------------------------------------------------------------------------------------------|------------------|
| <b>#</b>                                                                                                                                           | <b>Searches</b>                                                                                                                                                                                                                                                                                                                                                                                                                                                                                                                                                                                                                                                                                                  | <b># Results</b> |
| 1                                                                                                                                                  | exp Insurance Coverage/                                                                                                                                                                                                                                                                                                                                                                                                                                                                                                                                                                                                                                                                                          | 18088            |
| 2                                                                                                                                                  | (UHC or ((universal or population or public or national or essential or social) adj4 (coverage or benefit* or insurance or care or healthcare or health care or health-care or health servic* or medicin*))).tw,kf.                                                                                                                                                                                                                                                                                                                                                                                                                                                                                              | 192191           |
| 3                                                                                                                                                  | 1 or 2                                                                                                                                                                                                                                                                                                                                                                                                                                                                                                                                                                                                                                                                                                           | 205627           |
| 4                                                                                                                                                  | (financial adj3 (protection or risk or coverage or risk-sharing or hardship or assist* or barrier* or access)).tw,kf.                                                                                                                                                                                                                                                                                                                                                                                                                                                                                                                                                                                            | 7609             |
| 5                                                                                                                                                  | (financing adj3 (health or healthcare or health care or health-care or health service* or medicin*)).tw,kf.                                                                                                                                                                                                                                                                                                                                                                                                                                                                                                                                                                                                      | 5727             |
| 6                                                                                                                                                  | (cost-sharing or cost sharing or social health protection or social protection in health or social health promotion or reimbursement incentive* or monetary incentive* or cash transfer or cash transfers or cash grant or cash grants or monetary grant or monetary grants or non-monetary grant or non-monetary grants or non monetary grant or non monetary grants or social welfare or social assist* or social grant or social grants or social safety net or social safety-net or sociali?ed healthcare or sociali?ed health care or sociali?ed health-care or social security or health security or healthcare security or health care security or health-care security or public welfare servic*).tw,kf. | 21032            |
| 7                                                                                                                                                  | 4 or 5 or 6                                                                                                                                                                                                                                                                                                                                                                                                                                                                                                                                                                                                                                                                                                      | 33432            |
| 8                                                                                                                                                  | Vulnerable populations/ or exp Socioeconomic Factors/ or Healthcare Disparities/ or Health Status Disparities/ or Poverty Areas/ or Urban Population/ or "Social Determinants of Health"/                                                                                                                                                                                                                                                                                                                                                                                                                                                                                                                        | 548521           |
| 9                                                                                                                                                  | (health adj3 (gap or gaps or gradient* or hierarch*)).tw,kf.                                                                                                                                                                                                                                                                                                                                                                                                                                                                                                                                                                                                                                                     | 4294             |
| 10                                                                                                                                                 | (equit* or inequit* or inequalit* or disparit* or equality).tw,kf.                                                                                                                                                                                                                                                                                                                                                                                                                                                                                                                                                                                                                                               | 153269           |
| 11                                                                                                                                                 | ((social* or socio-economic or socioeconomic or economic or structural or material) adj3 (advantage* or disadvantage* or exclude* or exclusion or include* or inclusion or status or position or gradient* or hierarch* or class* or determinant* or vulnerab* or insecurit*)).tw,kf.                                                                                                                                                                                                                                                                                                                                                                                                                            | 145322           |
| 12                                                                                                                                                 | (SES or SEP or sociodemographic* or socio-demographic* or income or wealth* or poverty or educational level or level of education or educational attainment or well educated or better educated or unemploy* or home owner* or tenure or affluen* or well off or better off or worse off).tw,kf.                                                                                                                                                                                                                                                                                                                                                                                                                 | 335018           |
| 13                                                                                                                                                 | (poverty or precar* or impoverish* or depriv* or destitut* or marginalis* or marginaliz* or indigen* or low-income or low income).tw,kf.                                                                                                                                                                                                                                                                                                                                                                                                                                                                                                                                                                         | 214037           |
| 14                                                                                                                                                 | ((out-of-pocket or out of pocket or catastrophic) adj4 (spend* or expend* or cost* or expens* or payment*)).tw,kf.                                                                                                                                                                                                                                                                                                                                                                                                                                                                                                                                                                                               | 6509             |
| 15                                                                                                                                                 | 8 or 9 or 10 or 11 or 12 or 13 or 14                                                                                                                                                                                                                                                                                                                                                                                                                                                                                                                                                                                                                                                                             | 1045017          |
| 16                                                                                                                                                 | 3 and 7                                                                                                                                                                                                                                                                                                                                                                                                                                                                                                                                                                                                                                                                                                          | 7126             |
| 17                                                                                                                                                 | 3 and 15                                                                                                                                                                                                                                                                                                                                                                                                                                                                                                                                                                                                                                                                                                         | 48135            |
| 18                                                                                                                                                 | 16 or 17                                                                                                                                                                                                                                                                                                                                                                                                                                                                                                                                                                                                                                                                                                         | 51289            |
| 19                                                                                                                                                 | Meta-Analysis as Topic/                                                                                                                                                                                                                                                                                                                                                                                                                                                                                                                                                                                                                                                                                          | 20252            |

|    |                                                 |          |
|----|-------------------------------------------------|----------|
| 20 | meta analy\$.tw.                                | 209726   |
| 21 | metaanaly\$.tw.                                 | 2309     |
| 22 | Meta-Analysis/                                  | 141057   |
| 23 | (systematic adj (review\$1 or overview\$1)).tw. | 215867   |
| 24 | exp Review Literature as Topic/                 | 17597    |
| 25 | 19 or 20 or 21 or 22 or 23 or 24                | 360568   |
| 26 | cochrane.ab.                                    | 102470   |
| 27 | cochrane.ab.                                    | 102470   |
| 28 | (psychlit or psyclit).ab.                       | 915      |
| 29 | (psychinfo or psycinfo).ab.                     | 44220    |
| 30 | (cinahl or cinhal).ab.                          | 34735    |
| 31 | science citation index.ab.                      | 3359     |
| 32 | bids.ab.                                        | 576      |
| 33 | cancerlit.ab.                                   | 635      |
| 34 | 26 or 27 or 28 or 29 or 30 or 31 or 32 or 33    | 149833   |
| 35 | reference list\$.ab.                            | 19743    |
| 36 | bibliograph\$.ab.                               | 19851    |
| 37 | hand-search\$.ab.                               | 7592     |
| 38 | relevant journals.ab.                           | 1253     |
| 39 | manual search\$.ab.                             | 5024     |
| 40 | 35 or 36 or 37 or 38 or 39                      | 47958    |
| 41 | selection criteria.ab.                          | 32644    |
| 42 | data extraction.ab.                             | 25296    |
| 43 | 41 or 42                                        | 55488    |
| 44 | Review/                                         | 2855357  |
| 45 | 43 and 44                                       | 30460    |
| 46 | Comment/                                        | 926722   |
| 47 | Letter/                                         | 1150406  |
| 48 | Editorial/                                      | 579399   |
| 49 | animal/                                         | 6910459  |
| 50 | human/                                          | 19655862 |
| 51 | 49 not (49 and 50)                              | 4848355  |
| 52 | 46 or 47 or 48 or 51                            | 6770006  |
| 53 | 25 or 34 or 40 or 45                            | 426013   |
| 54 | 53 not 52                                       | 404619   |
| 55 | 18 and 54                                       | 1399     |
| 56 | limit 55 to (english or french)                 | 1370     |
| 57 | limit 56 to dt=19950101-20210720                | 1348     |

## Ovid APA PsycINFO (n = 454)

| APA PsycInfo <1806 to August Week 5 2021> |                                                                                                                                                                                                                                                                                                                                                                                                                                                                                                                                                                                                                                                                                                                  |           |
|-------------------------------------------|------------------------------------------------------------------------------------------------------------------------------------------------------------------------------------------------------------------------------------------------------------------------------------------------------------------------------------------------------------------------------------------------------------------------------------------------------------------------------------------------------------------------------------------------------------------------------------------------------------------------------------------------------------------------------------------------------------------|-----------|
| #                                         | Searches                                                                                                                                                                                                                                                                                                                                                                                                                                                                                                                                                                                                                                                                                                         | # Results |
| 1                                         | Health Care Reform/ or Global Health/                                                                                                                                                                                                                                                                                                                                                                                                                                                                                                                                                                                                                                                                            | 4912      |
| 2                                         | health insurance/ or exp employee health insurance/ or "underinsured (health insurance)"/ or "uninsured (health insurance)"/                                                                                                                                                                                                                                                                                                                                                                                                                                                                                                                                                                                     | 6044      |
| 3                                         | (UHC or ((universal or population or public or national or essential or social) adj4 (coverage or benefit* or insurance or care or healthcare or health care or health-care or health servic* or medicin*))).ti,ab.                                                                                                                                                                                                                                                                                                                                                                                                                                                                                              | 50112     |
| 4                                         | 1 or 2 or 3                                                                                                                                                                                                                                                                                                                                                                                                                                                                                                                                                                                                                                                                                                      | 58615     |
| 5                                         | (financial adj3 (protection or risk or coverage or risk-sharing or hardship or assist* or barrier* or access)).ti,ab.                                                                                                                                                                                                                                                                                                                                                                                                                                                                                                                                                                                            | 3467      |
| 6                                         | (financing adj3 (health or healthcare or health care or health-care or health service* or medicin*)).ti,ab.                                                                                                                                                                                                                                                                                                                                                                                                                                                                                                                                                                                                      | 693       |
| 7                                         | (cost-sharing or cost sharing or social health protection or social protection in health or social health promotion or reimbursement incentive* or monetary incentive* or cash transfer or cash transfers or cash grant or cash grants or monetary grant or monetary grants or non-monetary grant or non-monetary grants or non monetary grant or non monetary grants or social welfare or social assist* or social grant or social grants or social safety net or social safety-net or sociali?ed healthcare or sociali?ed health care or sociali?ed health-care or social security or health security or healthcare security or health care security or health-care security or public welfare servic*).ti,ab. | 8625      |
| 8                                         | 5 or 6 or 7                                                                                                                                                                                                                                                                                                                                                                                                                                                                                                                                                                                                                                                                                                      | 12656     |
| 9                                         | health disparities/                                                                                                                                                                                                                                                                                                                                                                                                                                                                                                                                                                                                                                                                                              | 9049      |
| 10                                        | exp Socioeconomic Status/                                                                                                                                                                                                                                                                                                                                                                                                                                                                                                                                                                                                                                                                                        | 60784     |
| 11                                        | health disparities/                                                                                                                                                                                                                                                                                                                                                                                                                                                                                                                                                                                                                                                                                              | 9049      |
| 12                                        | poverty/ or disadvantaged/ or lower income status/ or poverty areas/                                                                                                                                                                                                                                                                                                                                                                                                                                                                                                                                                                                                                                             | 18173     |
| 13                                        | "Equity (Social)"/ or "Equity (Payment)"/                                                                                                                                                                                                                                                                                                                                                                                                                                                                                                                                                                                                                                                                        | 3162      |
| 14                                        | (health adj3 (gap or gaps or gradient* or hierarch*)).ti,ab.                                                                                                                                                                                                                                                                                                                                                                                                                                                                                                                                                                                                                                                     | 1830      |
| 15                                        | (equit* or inequit* or inequalit* or disparit* or equality).ti,ab.                                                                                                                                                                                                                                                                                                                                                                                                                                                                                                                                                                                                                                               | 84511     |
| 16                                        | ((social* or socio-economic or socioeconomic or economic or structural or material) adj3 (advantage* or disadvantage* or exclude* or exclusion or include* or inclusion or status or position or gradient* or hierarch* or class* or determinant* or vulnerab* or insecurit*)).ti,ab.                                                                                                                                                                                                                                                                                                                                                                                                                            | 97625     |
| 17                                        | (SES or SEP or sociodemographic* or socio-demographic* or income or wealth* or poverty or educational level or level of education or educational attainment or well educated or better educated or unemploy* or home owner* or tenure or affluen* or well off or better off or worse off).ti,ab.                                                                                                                                                                                                                                                                                                                                                                                                                 | 189818    |
| 18                                        | (poverty or precar* or impoverish* or depriv* or destitut* or marginalis* or marginaliz* or indigen* or low-income or low income).ti,ab.                                                                                                                                                                                                                                                                                                                                                                                                                                                                                                                                                                         | 108472    |
| 19                                        | ((out-of-pocket or out of pocket or catastrophic) adj4 (spend* or expend* or cost* or expens* or payment*)).ti,ab.                                                                                                                                                                                                                                                                                                                                                                                                                                                                                                                                                                                               | 977       |
| 20                                        | 9 or 10 or 11 or 12 or 13 or 14 or 15 or 16 or 17 or 18 or 19                                                                                                                                                                                                                                                                                                                                                                                                                                                                                                                                                                                                                                                    | 400615    |
| 21                                        | 4 and 8                                                                                                                                                                                                                                                                                                                                                                                                                                                                                                                                                                                                                                                                                                          | 2166      |

|    |                                                                                                                                                                                                                                                                                                                                                                                                                                                                                                                     |        |
|----|---------------------------------------------------------------------------------------------------------------------------------------------------------------------------------------------------------------------------------------------------------------------------------------------------------------------------------------------------------------------------------------------------------------------------------------------------------------------------------------------------------------------|--------|
| 22 | 4 and 20                                                                                                                                                                                                                                                                                                                                                                                                                                                                                                            | 13418  |
| 23 | 21 or 22                                                                                                                                                                                                                                                                                                                                                                                                                                                                                                            | 14597  |
| 24 | (((comprehensive* or integrative or systematic*) adj3 (bibliographic* or review* or literature)) or (meta-analy* or metaanaly* or "research synthesis" or ((information or data) adj3 synthesis) or (data adj2 extract*))).ti,ab,id. or ((review adj5 (rationale or evidence)).ti,ab,id. and "Literature Review".md.) or (cinahl or (cochrane adj3 trial*) or embase or medline or psyclit or pubmed or scopus or "sociological abstracts" or "web of science").ab. or ("systematic review" or "meta analysis").md. | 105124 |
| 25 | 23 and 24                                                                                                                                                                                                                                                                                                                                                                                                                                                                                                           | 504    |
| 26 | limit 25 to up=19950101-20210720                                                                                                                                                                                                                                                                                                                                                                                                                                                                                    | 486    |
| 27 | limit 26 to (english or french)                                                                                                                                                                                                                                                                                                                                                                                                                                                                                     | 454    |

### EBSCO CINAHL-Plus (n = 935)

| EBSCO CINAHL Plus with Full Text |                                                                                                                                                                                                                                                                                                                                                                                                                                                                                                                                                                                                                                                                                                                                                                                                                                                                                                 |           |
|----------------------------------|-------------------------------------------------------------------------------------------------------------------------------------------------------------------------------------------------------------------------------------------------------------------------------------------------------------------------------------------------------------------------------------------------------------------------------------------------------------------------------------------------------------------------------------------------------------------------------------------------------------------------------------------------------------------------------------------------------------------------------------------------------------------------------------------------------------------------------------------------------------------------------------------------|-----------|
| #                                | Searches                                                                                                                                                                                                                                                                                                                                                                                                                                                                                                                                                                                                                                                                                                                                                                                                                                                                                        | # Results |
| S21                              | S14 AND S20<br>Limiters - Published Date: 19950101-20210731; Exclude MEDLINE records; Language: English, French                                                                                                                                                                                                                                                                                                                                                                                                                                                                                                                                                                                                                                                                                                                                                                                 | 935       |
| S20                              | S18 OR S19                                                                                                                                                                                                                                                                                                                                                                                                                                                                                                                                                                                                                                                                                                                                                                                                                                                                                      | 50,552    |
| S19                              | S15 AND S17                                                                                                                                                                                                                                                                                                                                                                                                                                                                                                                                                                                                                                                                                                                                                                                                                                                                                     | 47,638    |
| S18                              | S15 AND S16                                                                                                                                                                                                                                                                                                                                                                                                                                                                                                                                                                                                                                                                                                                                                                                                                                                                                     | 5,991     |
| S17                              | S6 OR S7 OR S8 OR S9 OR S10 OR S11 OR S12 OR S13                                                                                                                                                                                                                                                                                                                                                                                                                                                                                                                                                                                                                                                                                                                                                                                                                                                | 559,599   |
| S16                              | S3 OR S4 OR S5                                                                                                                                                                                                                                                                                                                                                                                                                                                                                                                                                                                                                                                                                                                                                                                                                                                                                  | 14,448    |
| S15                              | S1 OR S2                                                                                                                                                                                                                                                                                                                                                                                                                                                                                                                                                                                                                                                                                                                                                                                                                                                                                        | 232,140   |
| S14                              | (TI (systematic* n3 review*)) or (AB (systematic* n3 review*)) or (TI (systematic* n3 bibliographic*)) or (AB (systematic* n3 bibliographic*)) or (TI (systematic* n3 literature)) or (AB (systematic* n3 literature)) or (TI (comprehensive* n3 literature)) or (AB (comprehensive* n3 literature)) or (TI (comprehensive* n3 bibliographic*)) or (AB (comprehensive* n3 bibliographic*)) or (TI (integrative n3 review)) or (AB (integrative n3 review)) or (JN "Cochrane Database of Systematic Reviews") or (TI (information n2 synthesis)) or (TI (data n2 synthesis)) or (AB (information n2 synthesis)) or (AB (data n2 synthesis)) or (TI (data n2 extract*)) or (AB (data n2 extract*)) or (TI (medline or pubmed or psyclit or cinahl or (psycinfo not "psycinfo database") or "web of science" or scopus or embase)) or (AB (medline or pubmed or psyclit or cinahl or (psycinfo not | 231,631   |

|     |                                                                                                                                                                                                                                                                                                                                                                                                                                                                                                                                                                                                                                                                                                                                                                                                                                                                                                                                                                                                                                                                                                                                                                                                                                                                                                                                                                                                                            |         |
|-----|----------------------------------------------------------------------------------------------------------------------------------------------------------------------------------------------------------------------------------------------------------------------------------------------------------------------------------------------------------------------------------------------------------------------------------------------------------------------------------------------------------------------------------------------------------------------------------------------------------------------------------------------------------------------------------------------------------------------------------------------------------------------------------------------------------------------------------------------------------------------------------------------------------------------------------------------------------------------------------------------------------------------------------------------------------------------------------------------------------------------------------------------------------------------------------------------------------------------------------------------------------------------------------------------------------------------------------------------------------------------------------------------------------------------------|---------|
|     | “psycinfo database”) or “web of science” or scopus or embase)) or (MH “Systematic Review”) or (MH “Meta Analysis”) or (TI (meta-analy* or metaanaly*)) or (AB (meta-analy* or metaanaly*))                                                                                                                                                                                                                                                                                                                                                                                                                                                                                                                                                                                                                                                                                                                                                                                                                                                                                                                                                                                                                                                                                                                                                                                                                                 |         |
| S13 | TI((out-of-pocket or out of pocket or catastrophic) N4 (spend* or expend* or cost* or expens* or payment*)) or AB((out-of-pocket or out of pocket or catastrophic) N4 (spend* or expend* or cost* or expens* or payment*))                                                                                                                                                                                                                                                                                                                                                                                                                                                                                                                                                                                                                                                                                                                                                                                                                                                                                                                                                                                                                                                                                                                                                                                                 | 3,485   |
| S12 | TI(poverty or precar* or impoverish* or depriv* or destitut* or marginalis* or marginaliz* or indigen* or low-income or low income) or AB(poverty or precar* or impoverish* or depriv* or destitut* or marginalis* or marginaliz* or indigen* or low-income or low income)                                                                                                                                                                                                                                                                                                                                                                                                                                                                                                                                                                                                                                                                                                                                                                                                                                                                                                                                                                                                                                                                                                                                                 | 68,496  |
| S11 | TI(SES or SEP or sociodemographic* or socio-demographic* or income or wealth* or poverty or educational level or level of education or educational attainment or well educated or better educated or unemploy* or home owner* or tenure or affluen* or well off or better off or worse off) or AB(SES or SEP or sociodemographic* or socio-demographic* or income or wealth* or poverty or educational level or level of education or educational attainment or well educated or better educated or unemploy* or home owner* or tenure or affluen* or well off or better off or worse off)                                                                                                                                                                                                                                                                                                                                                                                                                                                                                                                                                                                                                                                                                                                                                                                                                                 | 151,541 |
| S10 | TI((social* or socio-economic or socioeconomic or economic or structural or material) N3 (advantage* or disadvantage* or exclude* or exclusion or include* or inclusion or status or position or gradient* or hierarch* or class* or determinant* or vulnerab* or insecurit*)) or AB((social* or socio-economic or socioeconomic or economic or structural or material) N3 (advantage* or disadvantage* or exclude* or exclusion or include* or inclusion or status or position or gradient* or hierarch* or class* or determinant* or vulnerab* or insecurit*))                                                                                                                                                                                                                                                                                                                                                                                                                                                                                                                                                                                                                                                                                                                                                                                                                                                           | 62,2760 |
| S9  | TI(equit* or inequit* or inequalit* or disparit* or equality) or AB(equit* or inequit* or inequalit* or disparit* or equality)                                                                                                                                                                                                                                                                                                                                                                                                                                                                                                                                                                                                                                                                                                                                                                                                                                                                                                                                                                                                                                                                                                                                                                                                                                                                                             | 71,667  |
| S8  | TI(health N3 (gap or gaps or gradient* or hierarch*)) or AB(health N3 (gap or gaps or gradient* or hierarch*))                                                                                                                                                                                                                                                                                                                                                                                                                                                                                                                                                                                                                                                                                                                                                                                                                                                                                                                                                                                                                                                                                                                                                                                                                                                                                                             | 3,571   |
| S7  | (MH "Health Status Disparities") OR (MH "Social Determinants of Health") OR (MH "Healthcare Disparities")                                                                                                                                                                                                                                                                                                                                                                                                                                                                                                                                                                                                                                                                                                                                                                                                                                                                                                                                                                                                                                                                                                                                                                                                                                                                                                                  | 27,070  |
| S6  | (MH "Socioeconomic Factors+")                                                                                                                                                                                                                                                                                                                                                                                                                                                                                                                                                                                                                                                                                                                                                                                                                                                                                                                                                                                                                                                                                                                                                                                                                                                                                                                                                                                              | 370,443 |
| S5  | TI(cost-sharing or cost sharing or social health protection or social protection in health or social health promotion or reimbursement incentive* or monetary incentive* or cash transfer or cash transfers or cash grant or cash grants or monetary grant or monetary grants or non-monetary grant or non-monetary grants or non monetary grant or non monetary grants or social welfare or social assist* or social grant or social grants or social safety net or social safety-net or sociali#ed healthcare or sociali#ed health care or sociali#ed health-care or social security or health security or healthcare security or health care security or health-care security or public welfare servic*) or AB(cost-sharing or cost sharing or social health protection or social protection in health or social health promotion or reimbursement incentive* or monetary incentive* or cash transfer or cash transfers or cash grant or cash grants or monetary grant or monetary grants or non-monetary grant or non-monetary grants or non monetary grant or non monetary grants or social welfare or social assist* or social grant or social grants or social safety net or social safety-net or sociali#ed healthcare or sociali#ed health care or sociali#ed health-care or social security or health security or healthcare security or health care security or health-care security or public welfare servic*) | 7,688   |

|    |                                                                                                                                                                                                                                                                                                                                                                                                                             |         |
|----|-----------------------------------------------------------------------------------------------------------------------------------------------------------------------------------------------------------------------------------------------------------------------------------------------------------------------------------------------------------------------------------------------------------------------------|---------|
| S4 | TI(financing N3 (health or healthcare or health care or health-care or health service* or medicin*)) or AB(financing N3 (health or healthcare or health care or health-care or health service* or medicin*))                                                                                                                                                                                                                | 2,168   |
| S3 | TI(financial N3 (protection or risk or coverage or risk-sharing or hardship or assist* or barrier* or access)) or AB(financial N3 (protection or risk or coverage or risk-sharing or hardship or assist* or barrier* or access))                                                                                                                                                                                            | 4,954   |
| S2 | TI(UHC or ((universal or population or public or national or essential or social) N4 (coverage or benefit* or insurance or care or healthcare or health care or health-care or health servic* or medicin*)) or AB(UHC or ((universal or population or public or national or essential or social) N4 (coverage or benefit* or insurance or care or healthcare or health care or health-care or health servic* or medicin*))) | 118,296 |
| S1 | (MH "Insurance+")                                                                                                                                                                                                                                                                                                                                                                                                           | 123,553 |

### ProQuest PAIS Index (n = 165)

| Search                                                                                                                                                                                                                                                                                                                                                                                                                                                                                                                                                                                                                                                                                                                                                                                                                                                                                                                                                                                                                                                                                                                                                                                                                                                                                                                                                                                                                                                                                                                                                                                                                                                                                                                                                                                                                                                                                                                                                                                                                                                                                                                                                                                                                                                                                                                                                                                                                                                                                                                                                                                                                                                                                                                                                                              | Results |
|-------------------------------------------------------------------------------------------------------------------------------------------------------------------------------------------------------------------------------------------------------------------------------------------------------------------------------------------------------------------------------------------------------------------------------------------------------------------------------------------------------------------------------------------------------------------------------------------------------------------------------------------------------------------------------------------------------------------------------------------------------------------------------------------------------------------------------------------------------------------------------------------------------------------------------------------------------------------------------------------------------------------------------------------------------------------------------------------------------------------------------------------------------------------------------------------------------------------------------------------------------------------------------------------------------------------------------------------------------------------------------------------------------------------------------------------------------------------------------------------------------------------------------------------------------------------------------------------------------------------------------------------------------------------------------------------------------------------------------------------------------------------------------------------------------------------------------------------------------------------------------------------------------------------------------------------------------------------------------------------------------------------------------------------------------------------------------------------------------------------------------------------------------------------------------------------------------------------------------------------------------------------------------------------------------------------------------------------------------------------------------------------------------------------------------------------------------------------------------------------------------------------------------------------------------------------------------------------------------------------------------------------------------------------------------------------------------------------------------------------------------------------------------------|---------|
| ti,ab((((UHC or ((universal or population or public or national or essential or social) NEAR/4 (coverage or benefit* or insurance or care or healthcare or "health care" or health-care or "health service" or "health services" or medicin*)) AND ((financial NEAR/3 (protection or risk or coverage or risk-sharing or hardship or assist* or barrier* or access)) OR (financing NEAR/3 (health or healthcare or "health care" or health-care or "health service" or "health services" or medicin*)) OR (cost-sharing or "cost sharing" or "social health protection" or "social protection in health" or "social health promotion" or "reimbursement incentive" or "reimbursement incentives" or "monetary incentive" or "monetary incentives" or "cash transfer" or "cash transfers" or "cash grant" or "cash grants" or "monetary grant" or "monetary grants" or "non-monetary grant" or "non-monetary grants" or "non monetary grant" or "non monetary grants" or "social welfare" or "social assistance" or "social grant" or "social grants" or "social safety net" or "social safety-net" or "socialized healthcare" or "socialised healthcare" or "socialized health care" or "socialised health care" or "socialized health-care" or "socialised health-care" or "social security" or "health security" or "healthcare security" or "health care security" or "health-care security" or "public welfare")))) OR ((UHC or ((universal or population or public or national or essential or social) NEAR/4 (coverage or benefit* or insurance or care or healthcare or "health care" or health-care or "health service" or "health services" or medicin*)) AND ((health NEAR/3 (gap or gaps or gradient* or hierarch*)) OR (equit* or inequit* or inequalit* or disparit* or equality) OR ((social* or socio-economic or socioeconomic or economic or structural or material) NEAR/3 (advantage* or disadvantage* or exclude* or exclusion or include* or inclusion or status or position or gradient* or hierarch* or class* or determinant* or vulnerab* or insecurit*)) OR (SES or SEP or sociodemographic* or socio-demographic* or income or wealth* or poverty or "educational level" or "level of education" or "educational attainment" or "well educated" or "well-education" or "better educated" or "better-educated" or unemploy* or homeowner or "home-owner" or "home owner" or homeowners or "home-owners" or "home owners" or tenure or affluen* or "well off" or "well-off" or "better off" or "better-off" or "worse off" or "worse-off") OR (poverty or precar* or impoverish* or depriv* or destitut* or marginalis* or marginaliz* or indigen* or low-income or "low income") OR ((out-of-pocket or "out of pocket" or catastrophic) NEAR/4 (spend* or | 165     |

expend\* or cost\* or expens\* or payment\*)))) AND (((comprehensive\* or integrative or systematic\* or realist or scoping or rapid or narrative) NEAR/3 (bibliographic\* or review\* or literature) OR (meta-analy\* or metaanaly\* or "meta analysis" or "meta analyse" or "meta analyze" "meta analysed" or "meta analyzed" or "meta analyzing" or "meta analysing" or "research synthesis") OR ((information or data) NEAR/3 synthesis) OR (data NEAR/2 extract\*) OR (review NEAR/5 (rationale OR evidence)) OR (cinahl or cinhal or cochrane or embase or medline or psyclit or psychlit or pubmed or scopus or "sociological abstracts" or "web of science"))))

Limit dates: 1995-01-01 to 2021-07-20

Limit language: English (no French option)



**Supplementary file 2.** Detailed eligibility criteria for scoping overview of reviews

| <b>Criterion</b>                         | <b>Definition for inclusion</b>                                                                                                                                                                                                                                                                                                                                                                                                                   | <b>Definition for exclusion</b>                                                                                                                                                                                                                                       |
|------------------------------------------|---------------------------------------------------------------------------------------------------------------------------------------------------------------------------------------------------------------------------------------------------------------------------------------------------------------------------------------------------------------------------------------------------------------------------------------------------|-----------------------------------------------------------------------------------------------------------------------------------------------------------------------------------------------------------------------------------------------------------------------|
| Research design                          | <p>Study methodology is a literature review (e.g., narrative, systematic, scoping, rapid, comparative, or realist reviews, including syntheses of quantitative, qualitative, or mixed methods data).</p> <p>Reviews could be combined with other methodologies (e.g., Delphi panel, survey, stakeholder interviews).</p> <p>An explicit 'Methods' section that confirms that a literature and/or document review was undertaken is available.</p> | <p>Study designs other than literature reviews.</p> <p>Studies where the methodology is unclear or not provided.</p>                                                                                                                                                  |
| Focus on universal health coverage (UHC) | <p>Study is focused on UHC, where UHC is of central interest to the article.</p> <p>UHC may be described using different terms denoting universality (e.g., universal coverage, insurance, or care).</p>                                                                                                                                                                                                                                          | <p>Study does not discuss UHC.</p> <p>Study incidentally mentions UHC, but it is not the focus of the article.</p>                                                                                                                                                    |
| Focus on financial risk protection       | <p>Study focuses on the achievement of UHC through FRP, where FRP is discussed in detail (e.g., as a concept, measure, or intervention).</p> <p>FRP is discussed in relation to the protection of health system users from financial hardship.</p>                                                                                                                                                                                                | <p>Study does not discuss FRP.</p> <p>Study incidentally mentions FRP, but it is not discussed in detail (e.g., as a concept, measure, or intervention).</p> <p>Study incidentally mentions FRP, but it is not discussed in the context of/as a dimension of UHC.</p> |
| Language                                 | Study is written in English or French.                                                                                                                                                                                                                                                                                                                                                                                                            | Studies in any language other than English or French.                                                                                                                                                                                                                 |
| Time frame                               | Study is published in or after 1995.                                                                                                                                                                                                                                                                                                                                                                                                              | Any studies published before 1995.                                                                                                                                                                                                                                    |
| Type of publication                      | Study is an original published work that has undergone peer-review.                                                                                                                                                                                                                                                                                                                                                                               | Conference abstracts, posters, editorials, thesis dissertations, technical reports, or books/book chapters.                                                                                                                                                           |
| Availability                             | Full text is accessible through the University of Toronto library services                                                                                                                                                                                                                                                                                                                                                                        |                                                                                                                                                                                                                                                                       |
